# Supplementary material for: π-Conjugated species with an unsupported Si–Si π-bond obtained from direct π-extension
Source: Royal Society of Chemistry journal article supplement (doi:10.1039/d1cc04332c), 2021-01-01
Supplement: d1cc04332c1.pdf [file d1cc04332c1.pdf]

## Electronic Supplementary Information

1,3-Diethynylbicyclo[1.1.0]tetrasilanes:  
 $\pi$ -Conjugated species with an unsupported Si–Si  $\pi$ -bond  
obtained from direct  $\pi$ -extension

*Takumi Nukazawa and Takeaki Iwamoto\**

Department of Chemistry, Graduate School of Science, Tohoku University, Sendai 980-8578, Japan

Email: [takeaki.iwamoto@tohoku.ac.jp](mailto:takeaki.iwamoto@tohoku.ac.jp)

### Contents

1. Experimental Details S2
2. NMR Spectra S5
3. X-ray Diffraction Analysis S14
4. UV-vis Absorption Spectra S17
5. Computational Study S20
6. References S39

## 1. Experimental Details

### General Procedures

All reactions involving air-sensitive compounds were performed under argon or nitrogen atmosphere using a high-vacuum line and a standard Schlenk techniques, or a glove box, as well as dry and oxygen-free solvents. Reactions at lower temperatures were performed using an EYELA PSL-1400 cryobath. NMR spectra were recorded on a Bruker Avance III 500 FT NMR spectrometer. The  $^1\text{H}$  and  $^{13}\text{C}$  NMR chemical shifts were referenced to residual  $^1\text{H}$  and  $^{13}\text{C}$  shifts of the solvents:  $\text{C}_6\text{D}_6$  ( $^1\text{H}$ :  $\delta$  7.16 and  $^{13}\text{C}$ :  $\delta$  128.0), toluene- $d_8$  ( $^1\text{H}$ :  $\delta$  2.08).<sup>S1</sup> The  $^{29}\text{Si}$  NMR chemical shifts were relative to  $\text{Me}_4\text{Si}$  in ppm ( $\delta$  0.00). The sampling of air-sensitive compounds was carried out using a VAC NEXUS 100027 type glove box. Mass spectra were recorded on a Bruker Daltonics SolariX 9.4T spectrometer and JEOL JMS-T100GCV spectrometer. UV-vis spectra were recorded on JASCO V-770 and V-660 spectrometers. X-ray analysis was carried out using a Bruker AXS APEXII CCD diffractometer.

### Materials

Dry and degassed hexane, and THF were prepared using a VAC 103991 solvent purifier. Benzene- $d_6$  was dried by molecular sieves  $4\text{\AA}$  after degassing through three freeze-pump-thaw cycles. Toluene- $d_8$  and 3-methylpentane were dried in a tube covered with potassium mirror and then distilled under reduced pressure prior to use. Hexamethyldisiloxane was dried by lithium aluminum hydride after degassing through three freeze-pump-thaw cycles. 1,3-Dichlorobicyclo[1.1.0]tetrasilane **1** was prepared according to the published procedure.<sup>S2</sup> 1-Octynyllithium and lithium phenylacetylide were prepared by the reactions of the corresponding alkyne with butyl lithium in THF. 1-Octyne, phenylacetylene and butyl lithium were commercially available and used without further purification.

### Synthesis of 1,3-Dioctynylbicyclo[1.1.0]tetrasilane **3** [TN864,865]

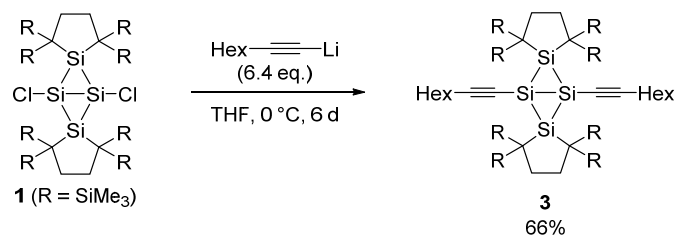

To a Schlenk tube (30 mL) equipped with a magnetic stir bar, 1,3-dichlorobicyclo[1.1.0]tetrasilane **1** (30.1 mg, 34.5  $\mu\text{mol}$ ) and 1-octynyllithium (25.5 mg, 220  $\mu\text{mol}$ ) were charged. To the Schlenk tube, dry and degassed THF (3.0 mL, cooled down to  $-27^\circ\text{C}$ ) was added and the mixture was stirred at  $0^\circ\text{C}$  for 6 days. The color of the resulting solution turned from orange to dark red. After the volatiles were removed in vacuo at  $0^\circ\text{C}$ , the crude was extracted with hexane and the filtrate was concentrated in vacuo. Recrystallization from hexamethyldisiloxane provided reddish purple crystals of **3** (23.4 mg, 22.9  $\mu\text{mol}$ ) in 66% yield.

**3**: reddish purple crystals; mp  $174\text{-}176^\circ\text{C}$  (decomp.);  $^1\text{H}$  NMR (500 MHz,  $\text{C}_6\text{D}_6$ , 296 K) 0.53 (s, 72H,  $\text{SiCH}_3$ ), 0.91 (t,  $J = 7.0$  Hz, 6H,  $\text{CH}_3$  (octynyl)), 1.16-1.24 (m, 4H,  $\text{CH}_2$  (octynyl)), 1.26-1.38 (m, 8H,  $\text{CH}_2$  (octynyl)), 1.50 (tt,  $J = 7.5$  Hz,  $J = 7.0$  Hz, 4H,  $\text{CH}_2$  (octynyl)), 2.05 (s, 8H,  $\text{CH}_2$  (silacyclopentane ring)), 2.30 (t,  $J = 7.0$  Hz, 4H,  $\text{CH}_2$  (octynyl));  $^{13}\text{C}$  NMR (126 MHz,  $\text{C}_6\text{D}_6$ , 297 K) 5.3 ( $\text{SiCH}_3$ ), 13.8 (C), 14.5 ( $\text{CH}_3$  (octynyl)), 21.6 ( $\text{CH}_2$  (octynyl)), 23.2 ( $\text{CH}_2$  (octynyl)), 28.6 ( $\text{CH}_2$  (octynyl)), 29.2 ( $\text{CH}_2$  (octynyl)), 31.9 ( $\text{CH}_2$  (octynyl)), 34.9 ( $\text{CH}_2$  (silacyclopentane ring)), 88.5 ( $\text{SiC}\equiv$ ), 130.3 ( $\text{HexC}\equiv$ );  $^{29}\text{Si}$  NMR (99 MHz,  $\text{C}_6\text{D}_6$ , 296 K)  $-8.0$  (Si), 4.7 ( $\text{SiMe}_3$ ), 83.3 ( $\text{SiC}\equiv$ ); UV-vis (hexane, 293 K)  $\lambda_{\text{max}}/\text{nm}$  ( $\epsilon$ ) 518 ( $5.6 \times 10^3$ ), 475 (sh,  $4.6 \times 10^3$ ), 340 ( $1.9 \times 10^3$ ), 248 ( $4.1 \times 10^4$ ), 212 ( $4.3 \times 10^4$ ); UV-vis (KBr matrix, 293 K)  $\lambda_{\text{max}}/\text{nm}$  552, 340, 249; HRMS (FD) Calcd for  $\text{C}_{48}\text{H}_{106}\text{Si}_{12}$  [ $\text{M}^+$ ], 1018.55257; Found, 1018.55232; Anal. Calcd for  $\text{C}_{48}\text{H}_{106}\text{Si}_{12}$ : C, 56.50; H, 10.47%. Found: C, 56.22; H, 10.78%.

### Synthesis of 1,3-Diphenylethynylbicyclo[1.1.0]tetrasilane **4** [TN575,577]

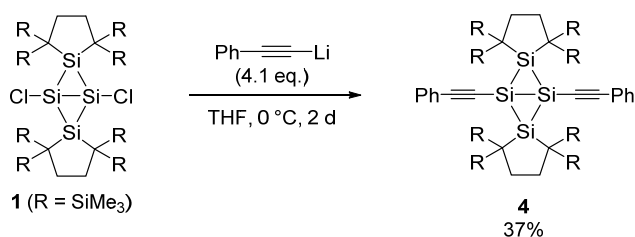

To a Schlenk tube (30 mL) equipped with a magnetic stir bar, 1,3-dichlorobicyclo[1.1.0]tetrasilane **1** (30.0 mg, 34.4  $\mu\text{mol}$ ) and lithium phenylacetylide (17.9 mg, 142  $\mu\text{mol}$ ) were charged. To the Schlenk tube, dry and degassed THF (5.0 mL, cooled down to  $-27^\circ\text{C}$ ) was added and the mixture was stirred at  $0^\circ\text{C}$  for 2 days. The color of the resulting suspension turned from orange to purple. After the volatiles were removed in vacuo at  $0^\circ\text{C}$ , the crude was extracted with hexane and the filtrate was concentrated in vacuo. The residue was washed with hexane to provide a blue solid of **4** (12.9 mg, 12.8  $\mu\text{mol}$ ) in 37% yield.

**4**: a blue solid; mp  $63\text{--}65^\circ\text{C}$  (decomp.);  $^1\text{H NMR}$  (500 MHz,  $\text{C}_6\text{D}_6$ , 295 K) 0.54 (s, 72H,  $\text{SiCH}_3$ ), 2.05 (s, 8H,  $\text{CH}_2$ ), 6.94–6.99 (m, 2H, aryl), 7.01–7.05 (m, 4H, aryl), 7.64–7.68 (m, 4H, aryl);  $^{13}\text{C NMR}$  (126 MHz,  $\text{C}_6\text{D}_6$ , 296 K) 5.2 ( $\text{SiCH}_3$ ), 14.1 (C), 34.9 ( $\text{CH}_2$ ), 98.6 ( $\text{SiC}\equiv$ ), 123.8 (aryl), 127.2 ( $\text{PhC}\equiv$ ), 128.9 (aryl), 129.5 (aryl), 131.7 (aryl);  $^{29}\text{Si NMR}$  (99 MHz,  $\text{C}_6\text{D}_6$ , 294 K)  $-6.1$  (Si), 4.9 ( $\text{SiMe}_3$ ), 91.5 ( $\text{SiC}\equiv$ ); UV-vis (hexane, 293 K)  $\lambda_{\text{max}}/\text{nm}$  ( $\epsilon$ ) 560 ( $7.8 \times 10^3$ ), 503 (sh,  $4.9 \times 10^3$ ), 312 ( $2.4 \times 10^4$ ), 298 (sh,  $2.2 \times 10^4$ ), 277 ( $2.2 \times 10^4$ ), 247 ( $3.8 \times 10^4$ ); UV-vis (KBr matrix, 293 K)  $\lambda_{\text{max}}/\text{nm}$  602, 317, 247, 214; HRMS (APCI\_positive) Calcd for  $\text{C}_{48}\text{H}_{90}\text{Si}_{12}$  [ $\text{M}^+$ ], 1002.42682; Found, 1002.42718; Anal. Calcd for  $\text{C}_{48}\text{H}_{90}\text{Si}_{12}$ : C, 57.41; H, 9.03%. Found: C, 57.60; H, 9.22%.

## 2. NMR Spectra

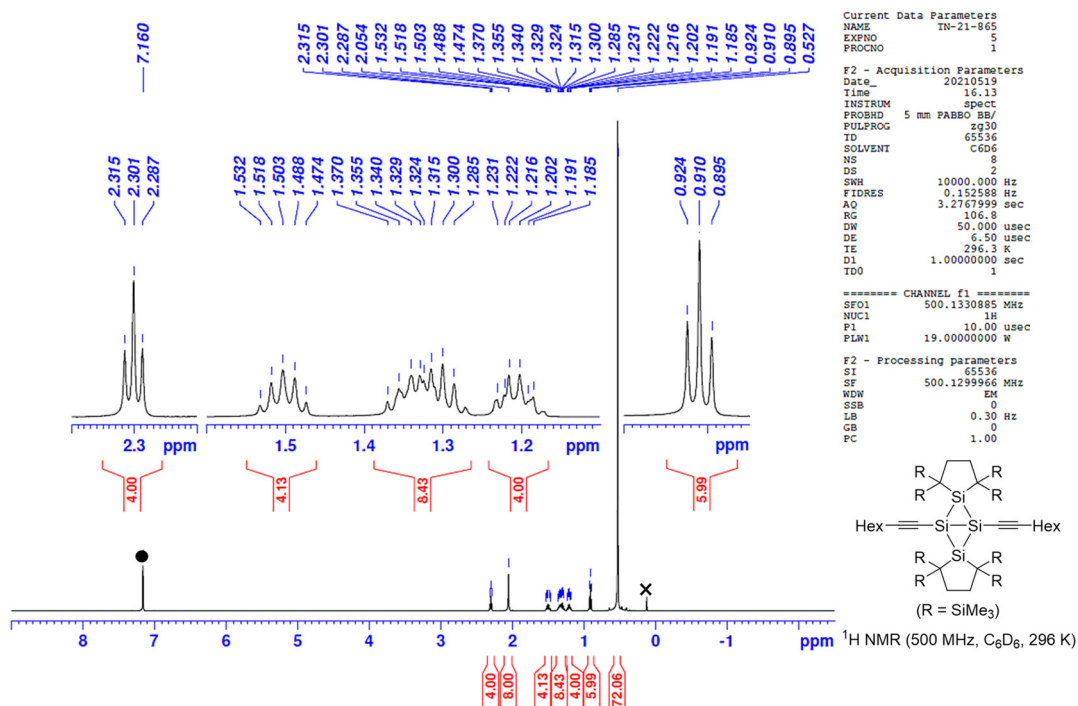

Figure S1. <sup>1</sup>H NMR spectrum of **3** in C<sub>6</sub>D<sub>6</sub> at 296 K (● = C<sub>6</sub>HD<sub>5</sub>, × = hexamethyldisiloxane).

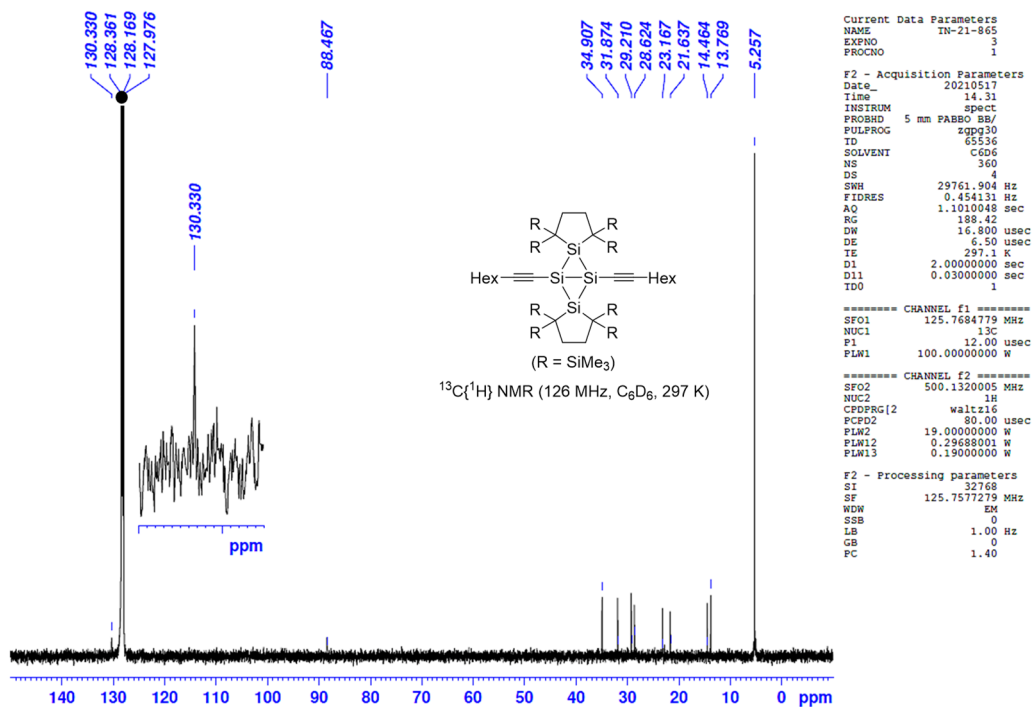

Figure S2. <sup>13</sup>C{<sup>1</sup>H} NMR spectrum of **3** in C<sub>6</sub>D<sub>6</sub> in 297 K (● = C<sub>6</sub>D<sub>6</sub>).

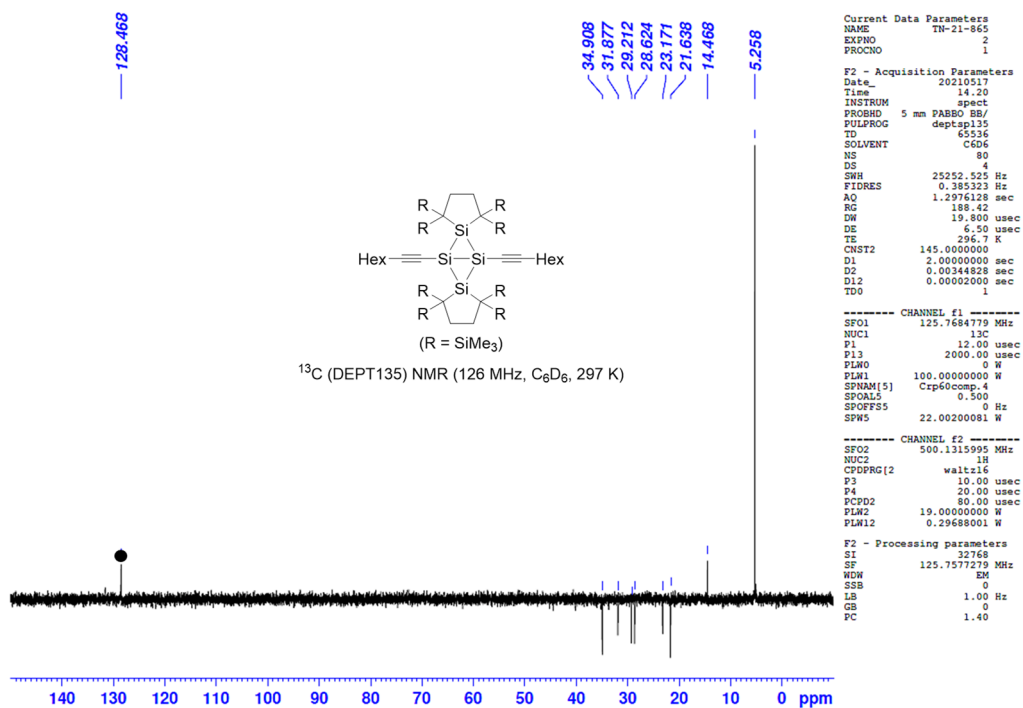

Figure S3. <sup>13</sup>C (DEPT135) NMR spectrum of **3** in C<sub>6</sub>D<sub>6</sub> at 297 K (● = C<sub>6</sub>D<sub>6</sub>).

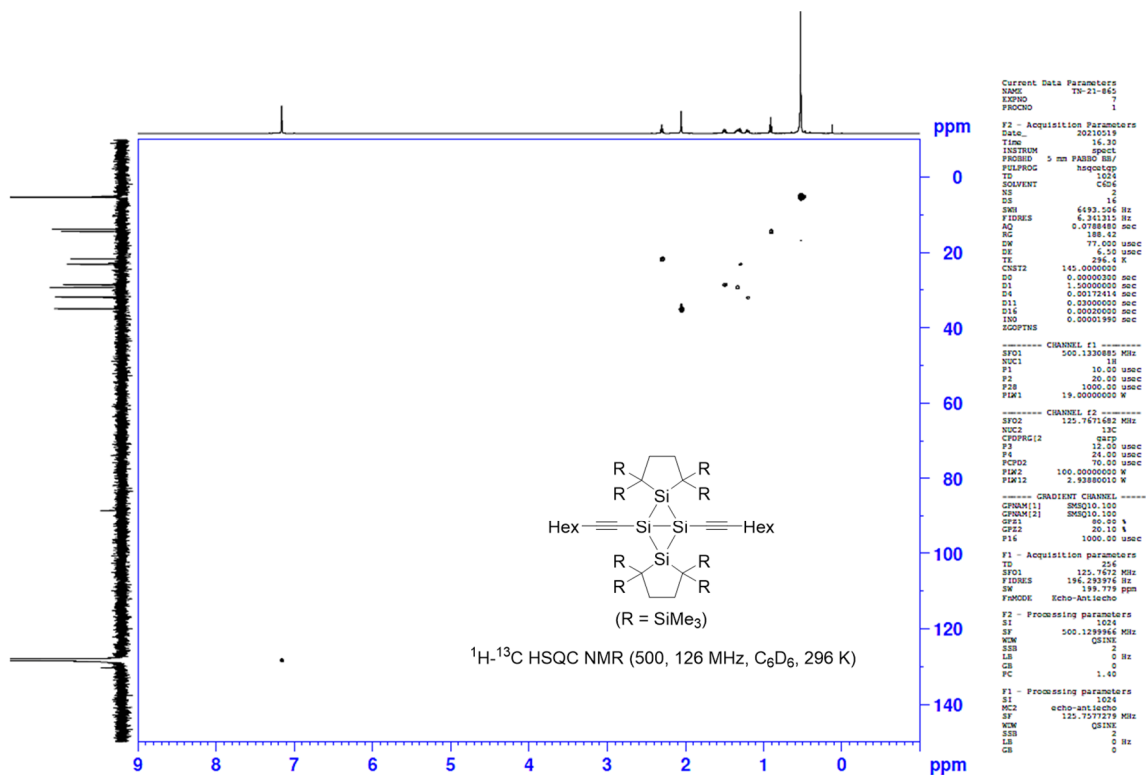

Figure S4. <sup>1</sup>H-<sup>13</sup>C HSQC NMR spectrum of **3** in C<sub>6</sub>D<sub>6</sub> at 296 K.

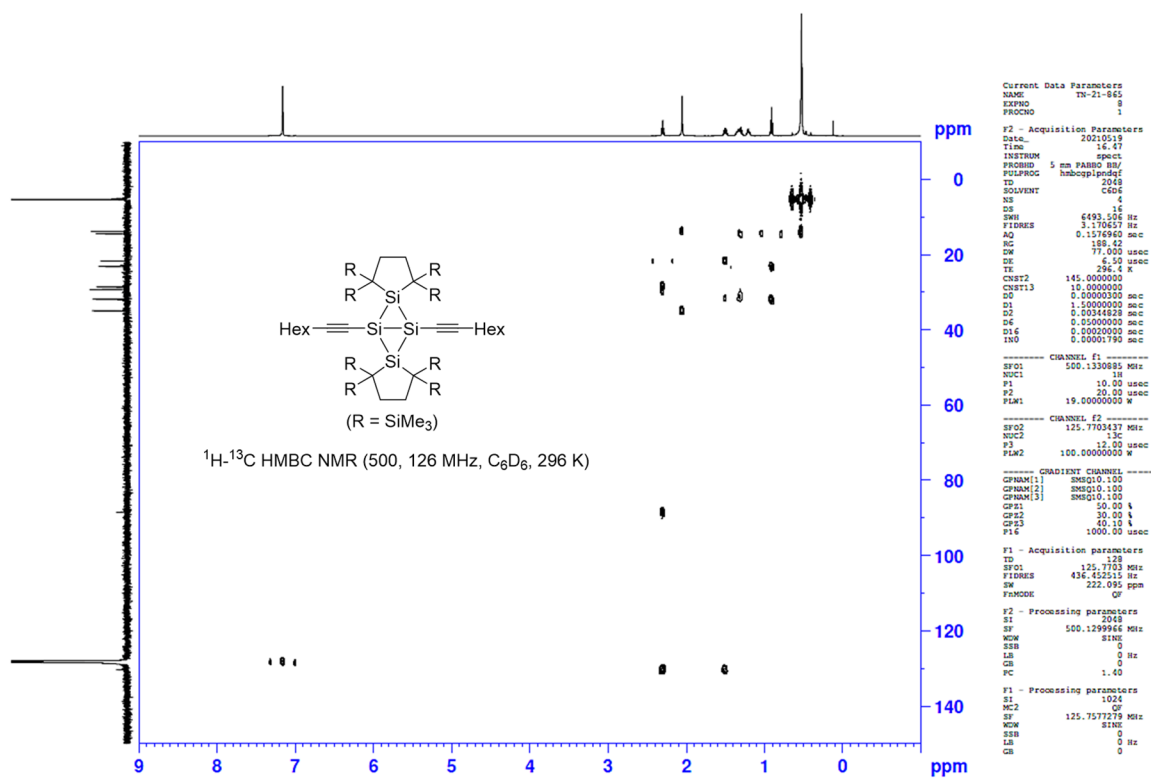

Figure S5.  $^1\text{H}-^{13}\text{C}$  HMBC NMR spectrum of **3** in  $\text{C}_6\text{D}_6$  at 296 K.

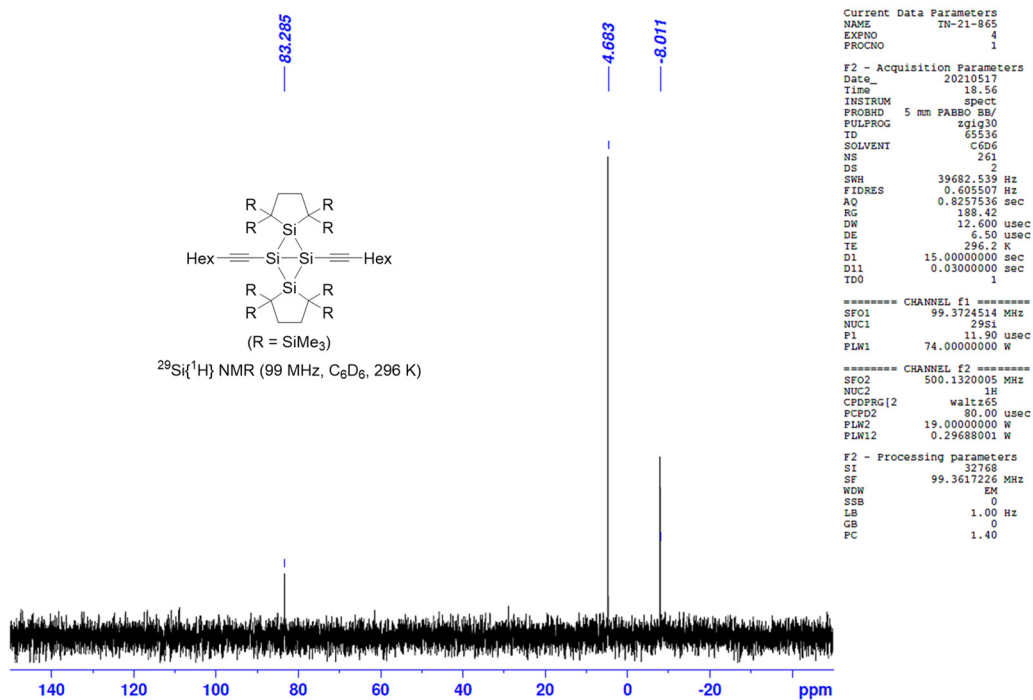

Figure S6.  $^{29}\text{Si}\{^1\text{H}\}$  NMR spectrum of **3** in  $\text{C}_6\text{D}_6$  at 296 K.

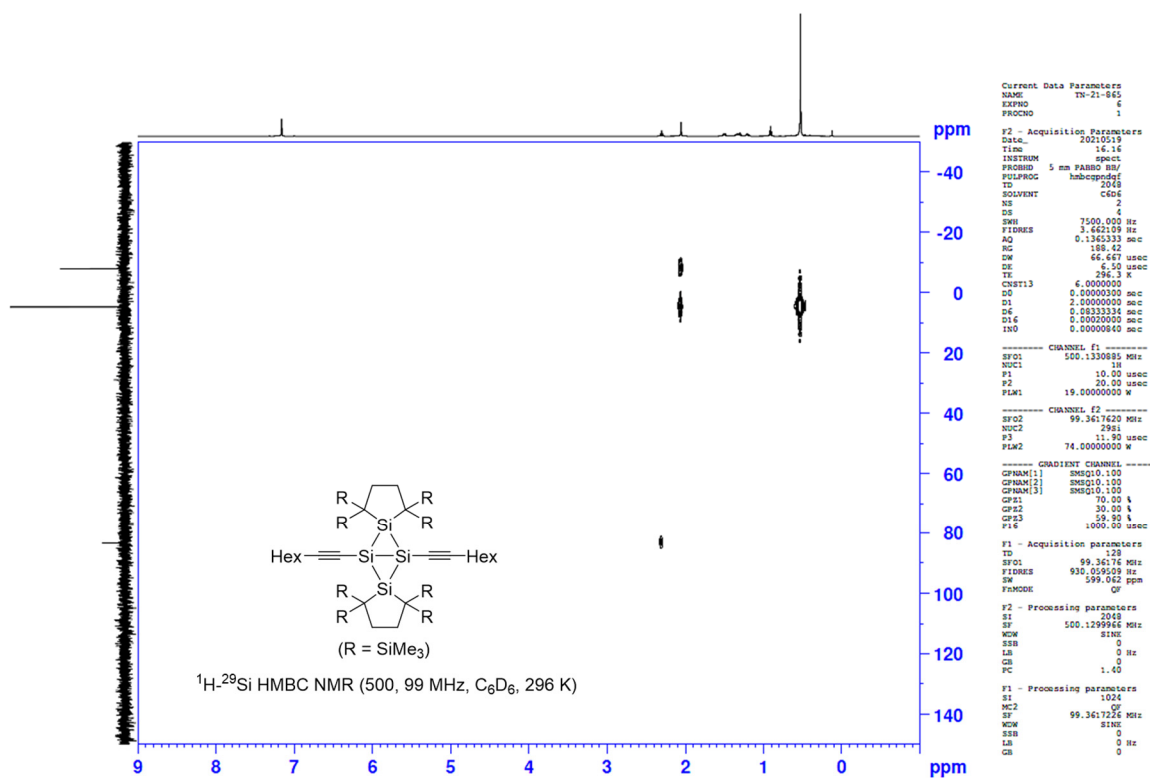

Figure S7. <sup>1</sup>H-<sup>29</sup>Si HMBC NMR spectrum of **3** in C<sub>6</sub>D<sub>6</sub> at 296 K.

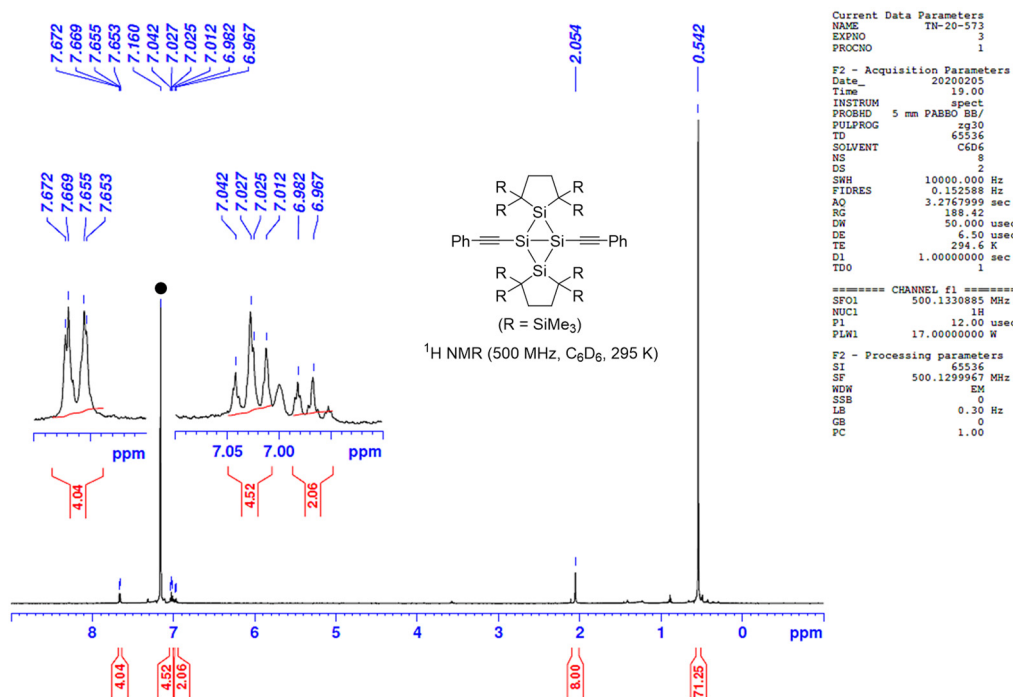

Figure S8. <sup>1</sup>H NMR spectrum of **4** in C<sub>6</sub>D<sub>6</sub> at 295 K (● = C<sub>6</sub>HD<sub>5</sub>).



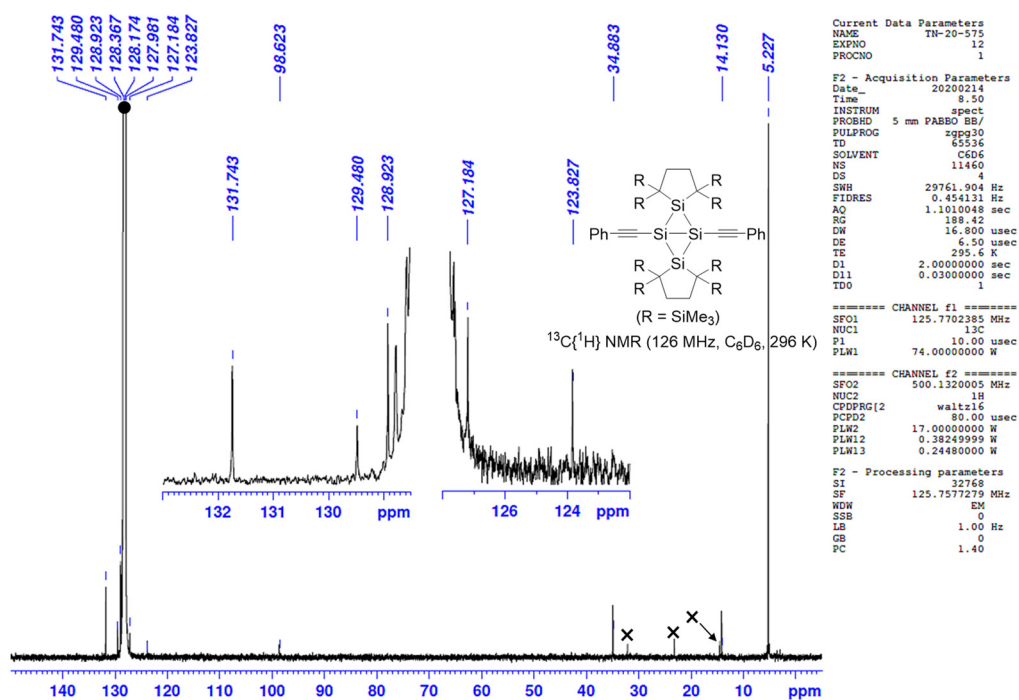

Figure S9. <sup>13</sup>C{<sup>1</sup>H} NMR spectrum of **4** in C<sub>6</sub>D<sub>6</sub> in 296 K (● = C<sub>6</sub>D<sub>6</sub>, x = hexane).

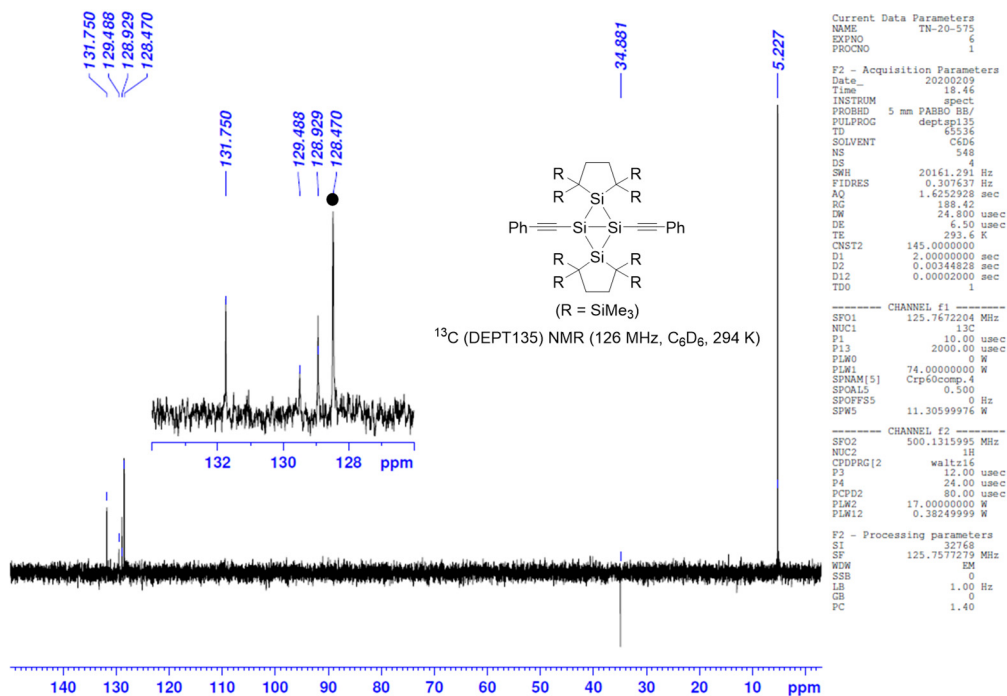

Figure S10. <sup>13</sup>C (DEPT135) NMR spectrum of **4** in C<sub>6</sub>D<sub>6</sub> at 294 K (● = C<sub>6</sub>D<sub>6</sub>).

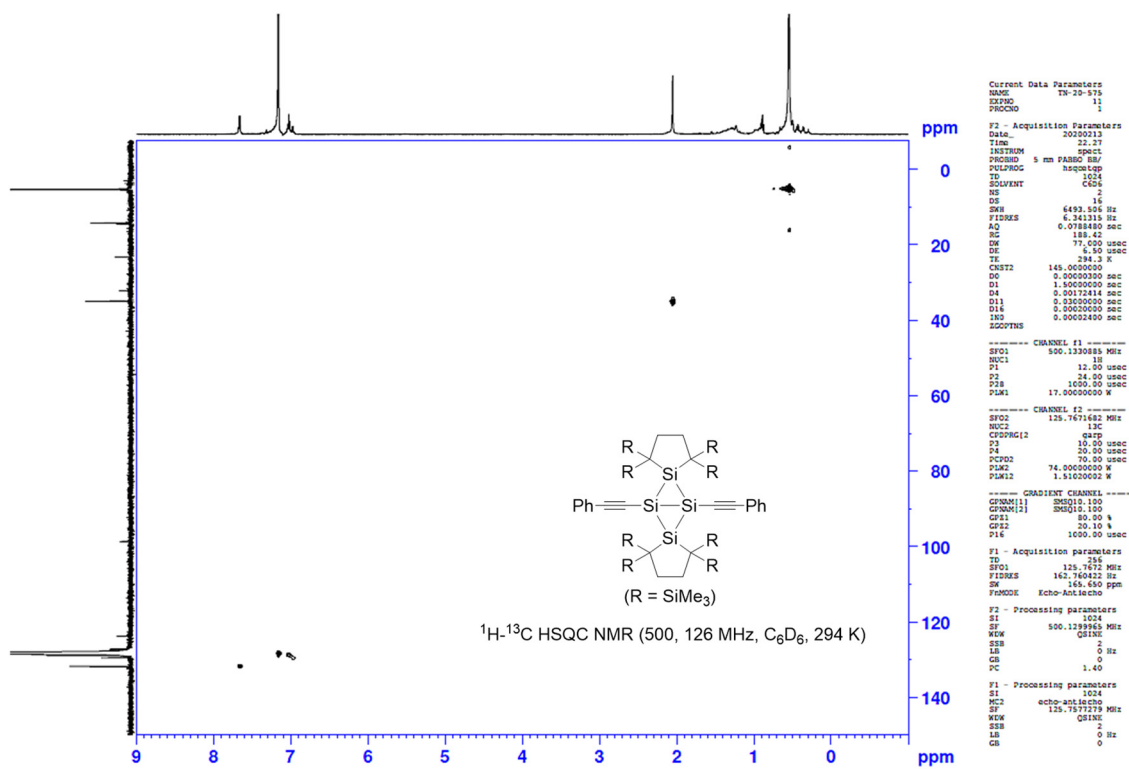

Figure S11. <sup>1</sup>H-<sup>13</sup>C HSQC NMR spectrum of **4** in C<sub>6</sub>D<sub>6</sub> at 294 K.

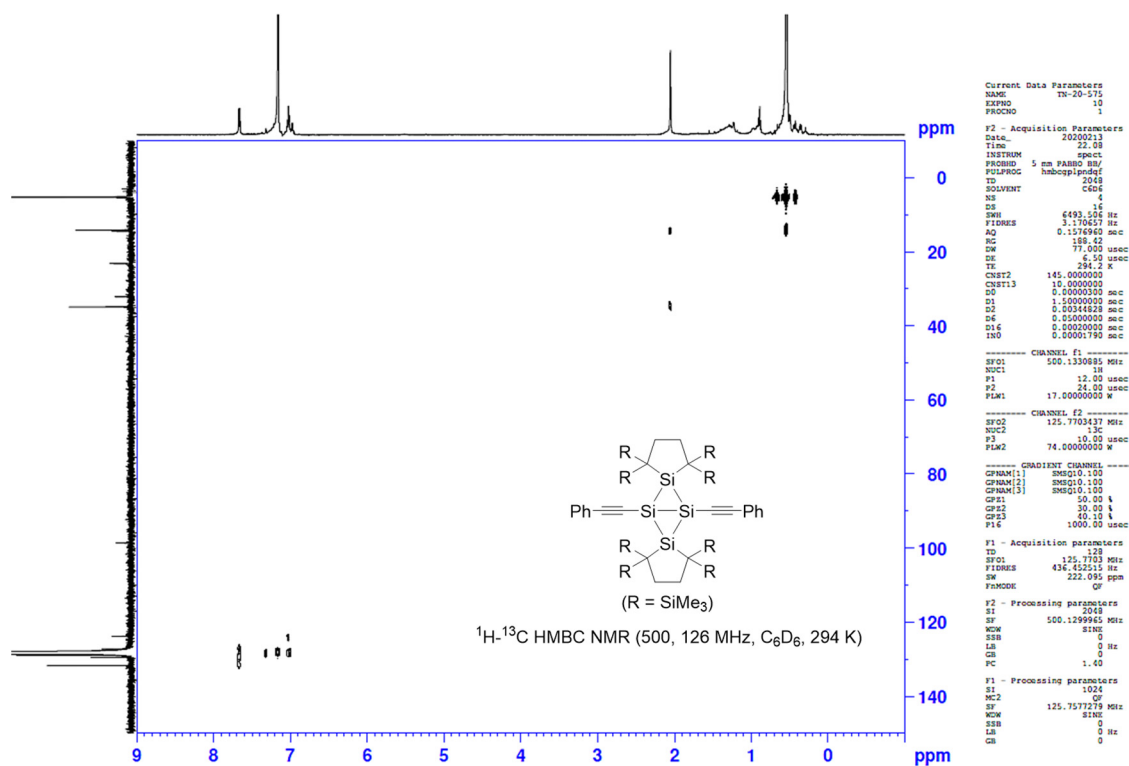

Figure S12. <sup>1</sup>H-<sup>13</sup>C HMBC NMR spectrum of **4** in C<sub>6</sub>D<sub>6</sub> at 294 K.

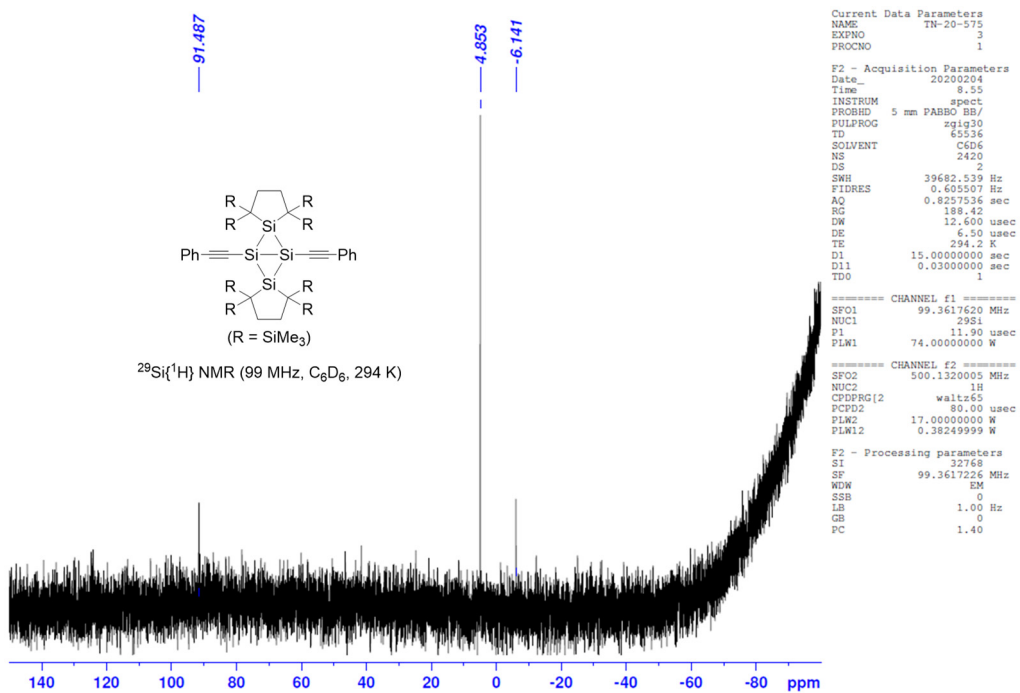

Figure S13. <sup>29</sup>Si{<sup>1</sup>H} NMR spectrum of 4 in C<sub>6</sub>D<sub>6</sub> at 294 K.

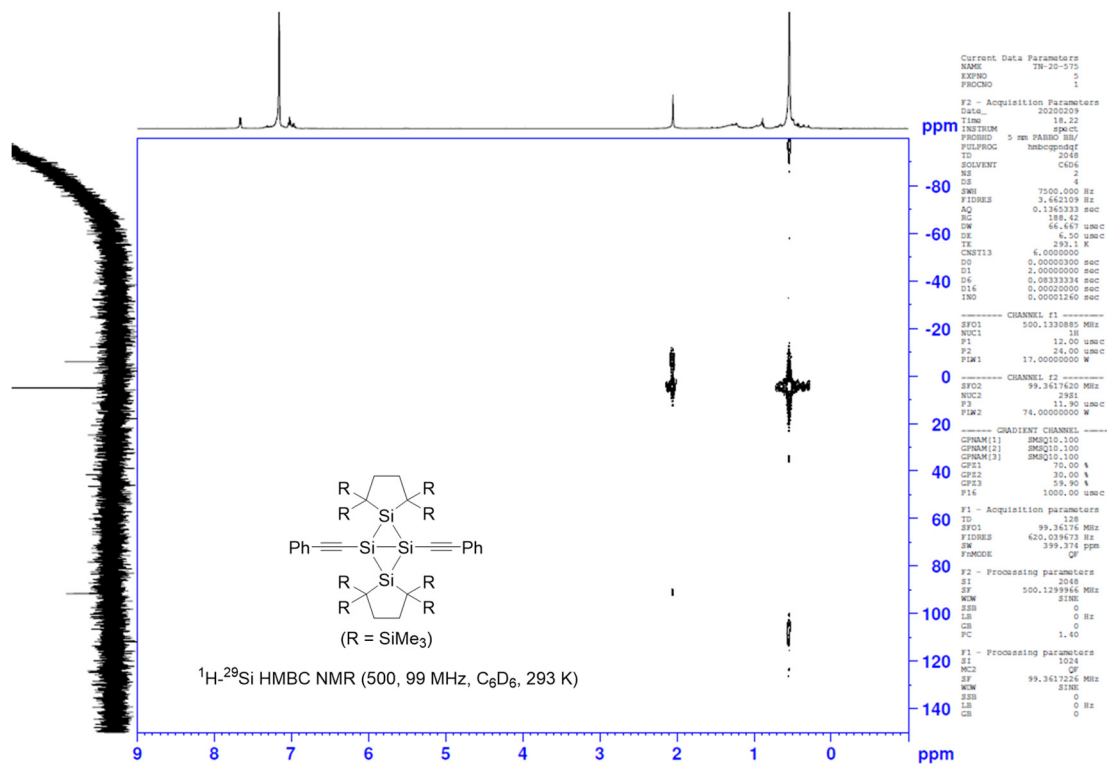

Figure S14. <sup>1</sup>H-<sup>29</sup>Si HMBC NMR spectrum of 4 in C<sub>6</sub>D<sub>6</sub> at 293 K.

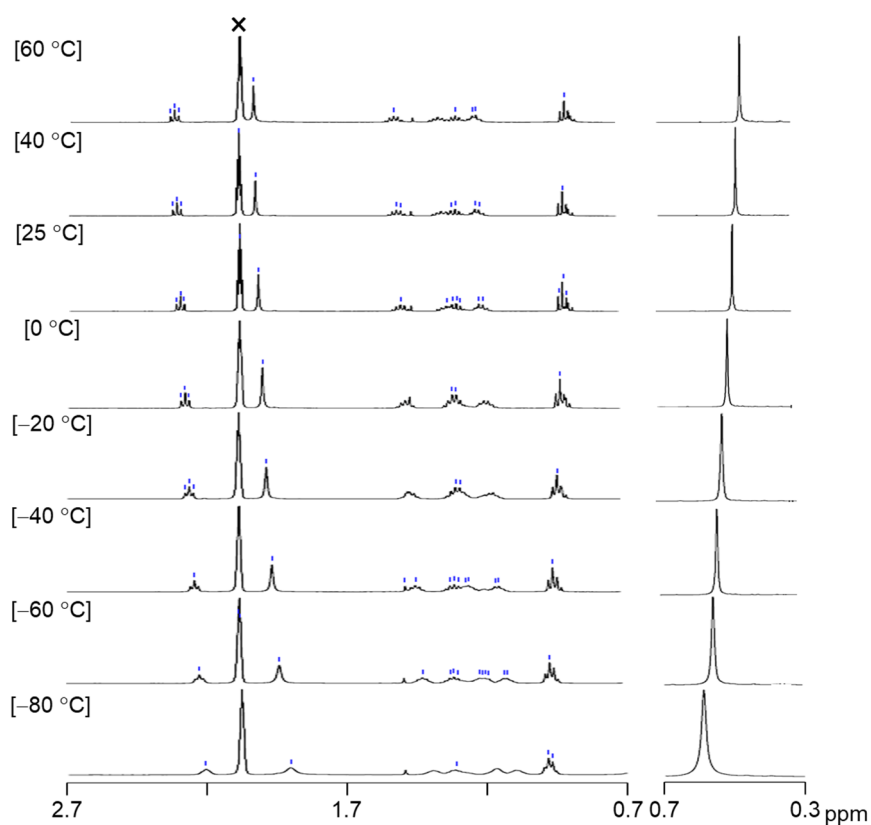

**Figure S15.**  $^1\text{H}$  NMR spectra of **3** in toluene- $d_8$  at variable temperatures ( $\times = \text{C}_7\text{D}_7\text{H}$ ).

**Table S1.**  $^{29}\text{Si}$  Chemical Shifts of **3** at Variable Temperatures.

| Temperature/ $^{\circ}\text{C}$ | $^{29}\text{Si}$ chemical shift/ppm <sup>a,b</sup> |           |                 | note        |
|---------------------------------|----------------------------------------------------|-----------|-----------------|-------------|
|                                 | Bridgehead Si                                      | Bridge Si | $\text{SiMe}_3$ |             |
| 60                              | 87.6                                               | -7.3      | 4.8             | TN880_NMR27 |
| 50                              | 86.3                                               | -7.5      | 4.6             | TN880_NMR25 |
| 40                              | 85.3                                               | -7.7      | 4.6             | TN880_NMR23 |
| 30                              | 84.4                                               | -8.0      | 4.6             | TN880_NMR21 |
| 25                              | 83.4                                               | -8.1      | 4.5             | TN880_NMR2  |
| 0                               | 80.4                                               | -8.6      | 4.6             | TN880_NMR18 |
| -10                             | 78.9                                               | -8.8      | 4.6             | TN880_NMR17 |
| -20                             | 77.1                                               | -9.2      | 4.6             | TN880_NMR9  |
| -30                             | 75.3                                               | -9.4      | 4.5             | TN880_NMR15 |
| -40                             | 73.2                                               | -9.6      | 4.4             | TN880_NMR5  |

a. These values were obtained by measurement of the  $^1\text{H}$ - $^{29}\text{Si}$  HMBC 2D NMR spectra in toluene- $d_8$ .

b. Spectral resolution is 0.39 ppm.

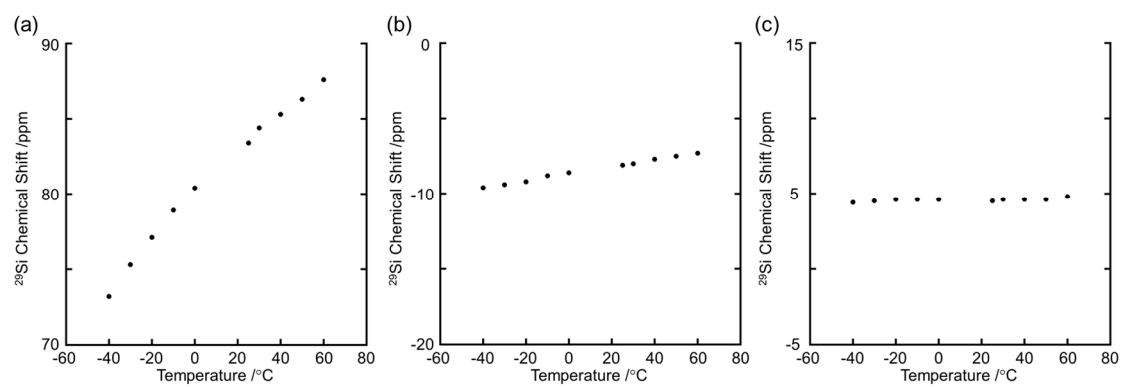

**Figure S16.** A plot of observed  $^{29}\text{Si}$  chemical shift of **3** vs measurement temperature (a: bridgehead Si, b: bridge Si, c:  $\text{SiMe}_3$ ).

### 3. X-ray Diffraction Analysis

Single crystals suitable for X-ray diffraction study were obtained by recrystallization in an inert atmosphere using the following conditions; from hexamethyldisiloxane at room temperature for **3**, from toluene at  $-27\text{ }^{\circ}\text{C}$  for **4**. For data collection, the single crystals coated by Apiezon grease were mounted on the glass fibre and then transferred to the cold nitrogen gas stream of the diffractometer. X-ray diffraction data were collected on a Bruker AXS APEX II CCD diffractometer using a graphite monochromated Mo-K $\alpha$  radiation. An empirical absorption correction based on the multiple measurements of equivalent reflections was applied using the program SADABS<sup>S3</sup> and the structures were solved by direct methods and refined by full-matrix least squares against  $F^2$  using all data (SHELXL-2018/3).<sup>S4</sup> Molecular structure was analysed by Yadokari-XG software.<sup>S5</sup>

Crystal data of **3** [tn87a] (100 K) [CCDC-2095782]: C<sub>48</sub>H<sub>106</sub>Si<sub>12</sub>; Fw 1020.40; triclinic;  $P-1$ ,  $a = 11.9028(5)\text{ \AA}$ ,  $b = 12.0034(5)\text{ \AA}$ ,  $c = 12.1944(5)\text{ \AA}$ ,  $\alpha = 79.1540(10)^{\circ}$ ,  $\beta = 81.4440(10)^{\circ}$ ,  $\gamma = 62.7870(10)^{\circ}$ ,  $V = 1517.81(11)\text{ \AA}^3$ ,  $Z = 1$ ,  $D_{\text{calc}} = 1.116\text{ Mg/m}^3$ ,  $R1 = 0.0304$  ( $I > 2\sigma(I)$ ),  $wR2 = 0.0786$  (all data), GOF = 1.045.

Crystal data of **4** [tn53b] (100 K) [CCDC-2095783]: C<sub>48</sub>H<sub>90</sub>Si<sub>12</sub>; Fw 1004.27; monoclinic;  $P2_1/c$ ,  $a = 10.9137(5)\text{ \AA}$ ,  $b = 23.4184(12)\text{ \AA}$ ,  $c = 11.4842(6)\text{ \AA}$ ,  $\beta = 90.4870(10)^{\circ}$ ,  $V = 2935.0(3)\text{ \AA}^3$ ,  $Z = 2$ ,  $D_{\text{calc}} = 1.136\text{ Mg/m}^3$ ,  $R1 = 0.0400$  ( $I > 2\sigma(I)$ ),  $wR2 = 0.1013$  (all data), GOF = 1.076.

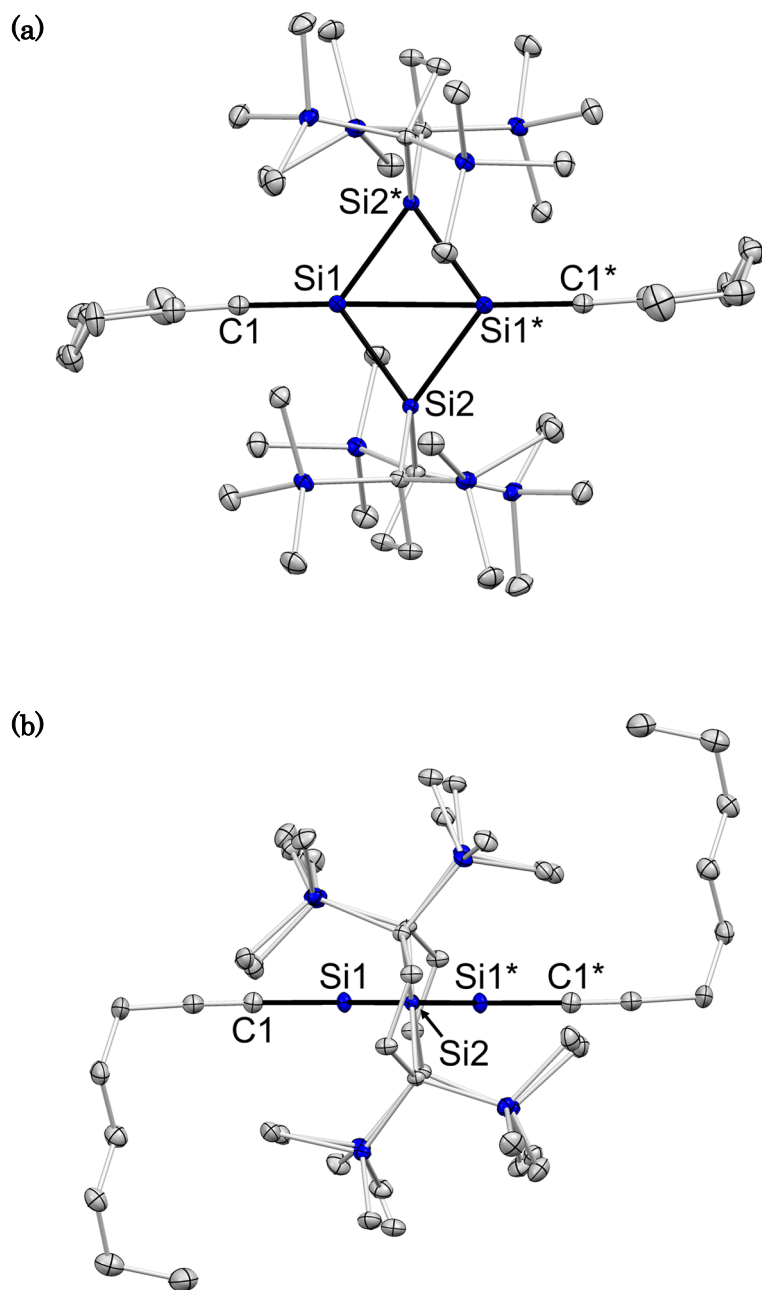

**Figure S17.** ORTEPs of **3** (a: top view, b: side view). Thermal ellipsoids are shown at the 50% probability level. Hydrogen atoms were omitted for clarity.

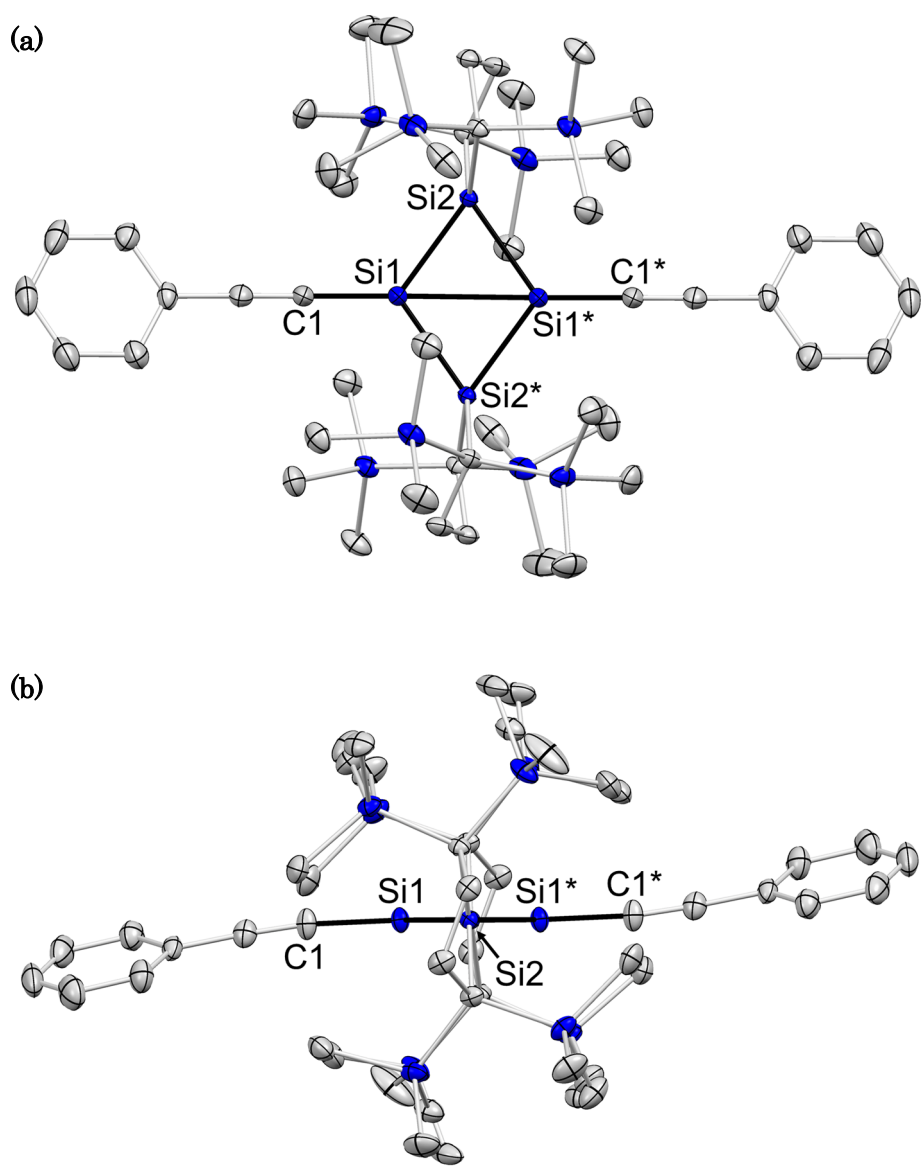

**Figure S18.** ORTEPs of **4** (a: top view, b: side view). Thermal ellipsoids are shown at the 50% probability level. Hydrogen atoms were omitted for clarity.



#### 4. UV-vis Absorption Spectrum [TN575,840,865,867]

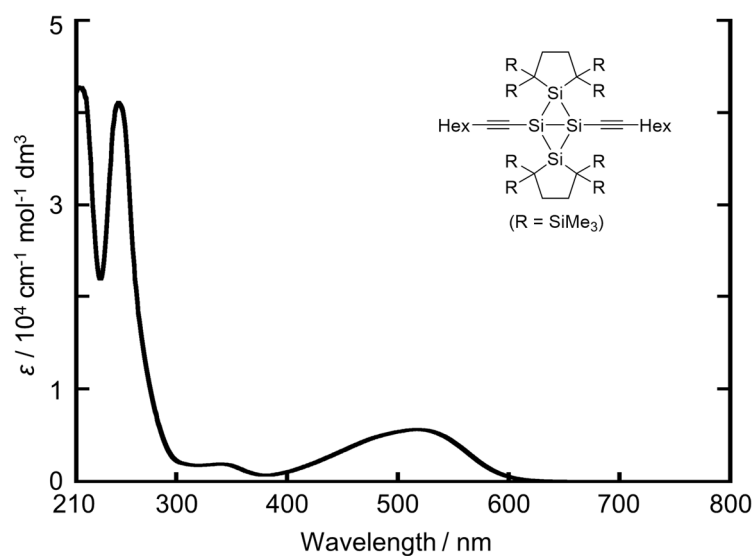

**Figure S19.** UV-Vis absorption spectrum of **3** in hexane at room temperature. [TN865]

**Table S2.** UV-vis Absorption Bands of **3** in Hexane at Room Temperature

| Absorption maximum / nm | $\epsilon / \text{cm}^{-1} \text{mol}^{-1} \text{dm}^3$ |
|-------------------------|---------------------------------------------------------|
| 518                     | 5,600                                                   |
| 475 sh <sup>a)</sup>    | 4,600                                                   |
| 340                     | 1,900                                                   |
| 248                     | 41,000                                                  |
| 212                     | 43,000                                                  |

a) sh = shoulder

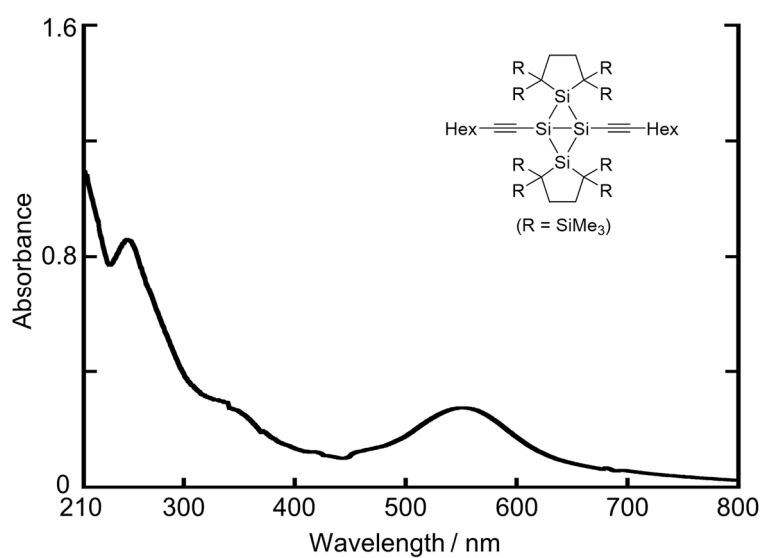

**Figure S20.** UV-Vis absorption spectrum of **3** in a KBr matrix at room temperature. [TN867]

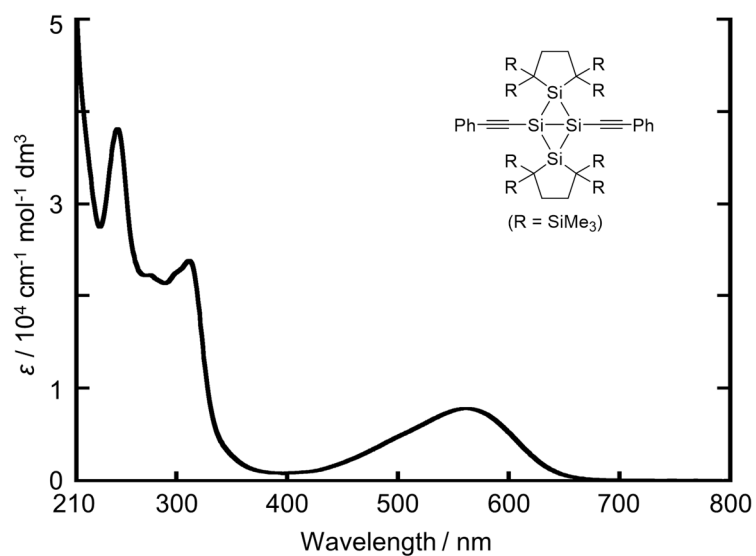

**Figure S21.** UV-Vis absorption spectrum of **4** in hexane at room temperature. [TN575]

**Table S3.** UV-vis Absorption Bands of **4** in Hexane at Room Temperature

| Absorption maximum / nm | $\epsilon / \text{cm}^{-1} \text{mol}^{-1} \text{dm}^3$ |
|-------------------------|---------------------------------------------------------|
| 560                     | 7,800                                                   |
| 503 sh <sup>a)</sup>    | 4,900                                                   |
| 312                     | 24,000                                                  |
| 298 sh <sup>a)</sup>    | 22,000                                                  |
| 277                     | 22,000                                                  |
| 247                     | 38,000                                                  |

a) sh = shoulder

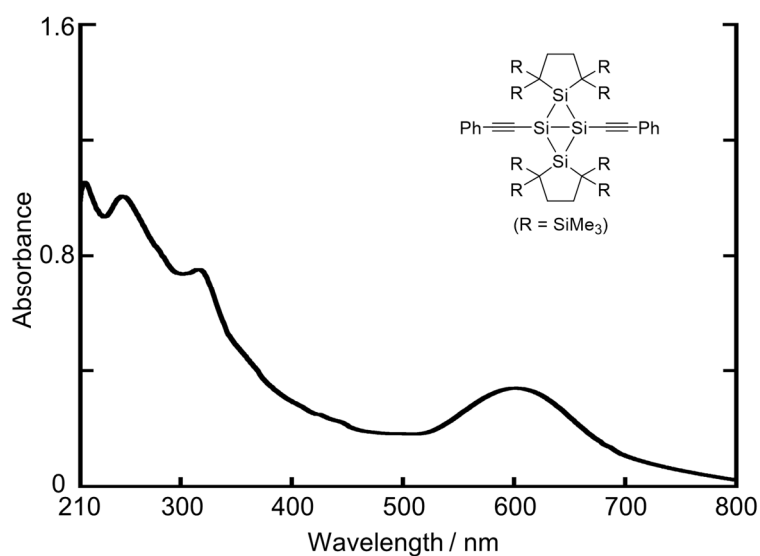

**Figure S22.** UV-Vis absorption spectrum of **4** in a KBr matrix at room temperature. [TN840]

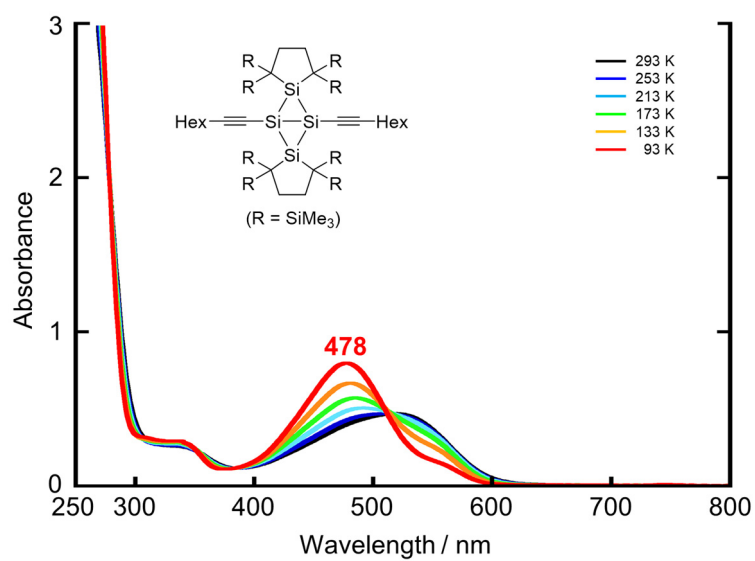

**Figure S23.** Variable-temperature UV-Vis absorption spectra of **3** in 3-methylpentane at 40 K intervals from 293 K to 93 K. [TN868]

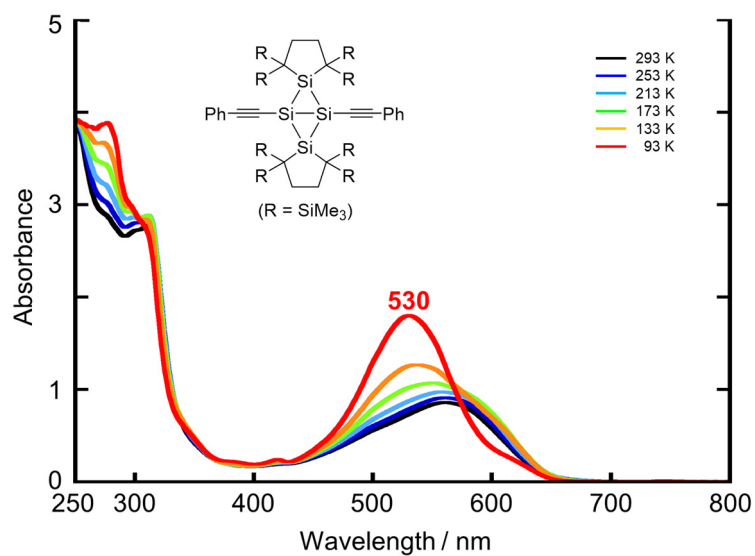

**Figure S24.** Variable-temperature UV-Vis absorption spectra of **4** in 3-methylpentane at 40 K intervals from 293 K to 93 K. [TN600]

## 5. Computational Study

All theoretical calculations were performed using a Gaussian 09<sup>S6</sup> program or GRRM14 program.<sup>S7</sup> Geometry optimization was carried out at the  $\omega$ B97XD/6-311G(d) (**3**<sub>opt</sub>) and  $\omega$ B97XD/6-311G(d) (SCRF = heptane) (**5**<sub>p</sub>, **5**<sub>c</sub>, **5**<sub>c'</sub>, and **5**<sub>c''</sub>) level of theory. Frontier Kohn-Sham orbitals and their energy levels of **3**<sub>cry</sub>, **4**<sub>cry</sub>, **5**<sub>p</sub>, and **5**<sub>c</sub> were shown in Figure S26. The atomic coordinates and energies of the optimized structures are summarized in the file named “optimized\_structures.xyz”. The selected structural parameters of **3**<sub>cry</sub>, **3**<sub>opt</sub>, **5**<sub>p</sub>, **5**<sub>c</sub>, **5**<sub>c'</sub>, and **5**<sub>c''</sub> are summarized in Tables S4 and S5. Isotropic chemical shielding tensors were calculated at the GIAO/M06L/6-311+G(2df,p) level of theory (Table S6). Absolute isotropic shielding tensors of <sup>29</sup>Si nucleus in tetramethylsilane were calculated to be 361.4 (GIAO/M06L/6-311+G(2df,p)). Natural bond orbital (NBO)<sup>S8</sup> calculations of **3**<sub>cry</sub> and **4**<sub>cry</sub> were performed at the  $\omega$ B97XD/6-311G(d) level of theory. Excitation energies and oscillator strengths of **3**<sub>cry</sub>, **4**<sub>cry</sub>, **5**<sub>p</sub>, and **5**<sub>c</sub> were calculated at the M06-2X/6-311G(d) level of theory (Tables S7-S10).

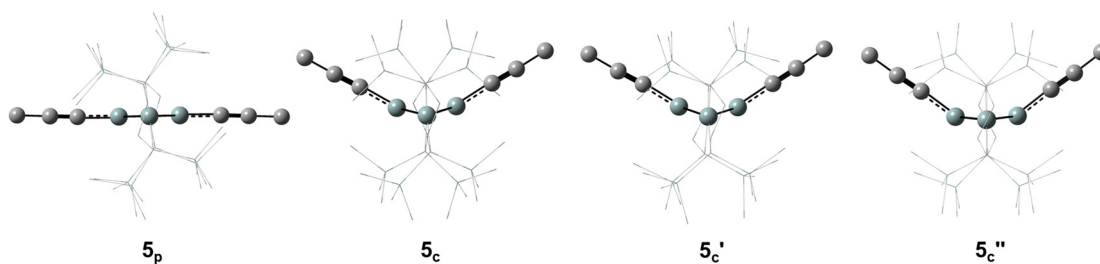

**Figure S25.** Molecular structures (side view) of **5**<sub>p</sub>, **5**<sub>c</sub>, **5**<sub>c'</sub>, and **5**<sub>c''</sub> optimized at the  $\omega$ B97XD/6-311G(d) (SCRF = heptane) level of theory.

**Table S4.** Selected Structural Parameters of **3<sub>cry</sub>** and **3<sub>opt</sub>**

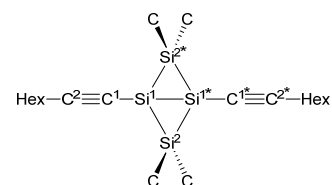

| Cpd                    | distance/Å                        |                                  |                                   |                                 |                                |                                                   | angle/°                                         |                                                    |                                                    |                                                                      | note<br>(job name) |  |
|------------------------|-----------------------------------|----------------------------------|-----------------------------------|---------------------------------|--------------------------------|---------------------------------------------------|-------------------------------------------------|----------------------------------------------------|----------------------------------------------------|----------------------------------------------------------------------|--------------------|--|
|                        | Si <sup>1</sup> -Si <sup>1*</sup> | Si <sup>1</sup> -Si <sup>2</sup> | Si <sup>1</sup> -Si <sup>2*</sup> | Si <sup>1</sup> -C <sup>1</sup> | C <sup>1</sup> -C <sup>2</sup> | C <sup>1</sup> -Si <sup>1</sup> -Si <sup>1*</sup> | C <sup>2</sup> -C <sup>1</sup> -Si <sup>1</sup> | Si <sup>1</sup> -Si <sup>2</sup> -Si <sup>1*</sup> | Si <sup>2</sup> -Si <sup>1</sup> -Si <sup>2*</sup> | Si <sup>2</sup> -Si <sup>1</sup> -Si <sup>1*</sup> -Si <sup>2*</sup> |                    |  |
| XRD                    |                                   |                                  |                                   |                                 |                                |                                                   |                                                 |                                                    |                                                    |                                                                      |                    |  |
| <b>3<sub>cry</sub></b> | 2.7112(7)                         | 2.3160(5)                        | 2.3256(5)                         | 1.8207(15)                      | 1.200(2)                       | 178.59(5)                                         | 176.51(13)                                      | 71.481(18)                                         | 108.519(18)                                        | 180.00                                                               | tn87a              |  |
| DFT <sup>a</sup>       |                                   |                                  |                                   |                                 |                                |                                                   |                                                 |                                                    |                                                    |                                                                      |                    |  |
| <b>3<sub>opt</sub></b> | 2.67379                           | 2.29718                          | 2.30776                           | 1.81264                         | 1.21154                        | 178.161                                           | 174.304                                         | 70.990                                             | 109.010                                            | 180.000                                                              | TN120da            |  |

a. optimized at the ωB97XD/6-311G(d) level of theory.

**Table S5.** Selected Structural Parameters of **5<sub>p</sub>**, **5<sub>c</sub>**, **5<sub>c'</sub>** and **5<sub>c''</sub>**

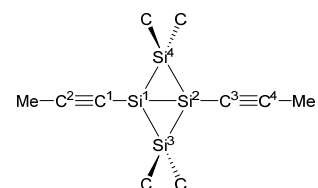

| Cpd                    | distance/Å                       |                                  |                                  |                                  |                                  |                                 | angle/°                         |                                |                                |                                                  |                                                  |                                                 |                                                 | <i>E</i> <sup>b,c</sup><br>[Δ <i>G</i> ] <sup>b,d</sup> | Δ <i>E</i> <sup>c,e</sup><br>[ΔΔ <i>G</i> ] <sup>d,e</sup> | note<br>(job name) |                                                                    |
|------------------------|----------------------------------|----------------------------------|----------------------------------|----------------------------------|----------------------------------|---------------------------------|---------------------------------|--------------------------------|--------------------------------|--------------------------------------------------|--------------------------------------------------|-------------------------------------------------|-------------------------------------------------|---------------------------------------------------------|------------------------------------------------------------|--------------------|--------------------------------------------------------------------|
|                        | Si <sup>1</sup> -Si <sup>2</sup> | Si <sup>1</sup> -Si <sup>3</sup> | Si <sup>1</sup> -Si <sup>4</sup> | Si <sup>2</sup> -Si <sup>3</sup> | Si <sup>2</sup> -Si <sup>4</sup> | Si <sup>1</sup> -C <sup>1</sup> | Si <sup>2</sup> -C <sup>3</sup> | C <sup>1</sup> -C <sup>2</sup> | C <sup>3</sup> -C <sup>4</sup> | C <sup>1</sup> -Si <sup>1</sup> -Si <sup>2</sup> | C <sup>3</sup> -Si <sup>2</sup> -Si <sup>1</sup> | C <sup>2</sup> -C <sup>1</sup> -Si <sup>1</sup> | C <sup>4</sup> -C <sup>3</sup> -Si <sup>2</sup> |                                                         |                                                            |                    | Si <sup>3</sup> -Si <sup>1</sup> -Si <sup>2</sup> -Si <sup>4</sup> |
| DFT <sup>a</sup>       |                                  |                                  |                                  |                                  |                                  |                                 |                                 |                                |                                |                                                  |                                                  |                                                 |                                                 |                                                         |                                                            |                    |                                                                    |
| <b>5<sub>p</sub></b>   | 2.67959                          | 2.29820                          | 2.30696                          | 2.30696                          | 2.29820                          | 1.81452                         | 1.81452                         | 1.21138                        | 1.21138                        | 178.373                                          | 178.373                                          | 177.273                                         | 177.273                                         | 180.000                                                 | -4972.787402                                               | 0.0                | TN116db                                                            |
| <b>5<sub>c</sub></b>   | 2.54519                          | 2.30283                          | 2.31023                          | 2.31023                          | 2.30283                          | 1.81026                         | 1.81026                         | 1.21045                        | 1.21045                        | 148.865                                          | 148.865                                          | 177.316                                         | 177.316                                         | 158.584                                                 | [-4972.896005]                                             | [0.0]              | TN117bb                                                            |
| <b>5<sub>c'</sub></b>  | 2.52079                          | 2.29977                          | 2.31678                          | 2.31467                          | 2.29824                          | 1.80992                         | 1.80837                         | 1.21003                        | 1.20977                        | 148.704                                          | 145.460                                          | 175.900                                         | 179.070                                         | 155.161                                                 | [-4972.897349]                                             | [-3.5]             | TN121bb                                                            |
| <b>5<sub>c''</sub></b> | 2.63320                          | 2.32112                          | 2.32606                          | 2.32606                          | 2.32112                          | 1.81198                         | 1.81198                         | 1.21016                        | 1.21016                        | 142.545                                          | 142.545                                          | 176.549                                         | 176.549                                         | 171.213                                                 | [-4972.895845]                                             | [0.4]              | TN124bb                                                            |
|                        |                                  |                                  |                                  |                                  |                                  |                                 |                                 |                                |                                |                                                  |                                                  |                                                 |                                                 |                                                         | [-4972.888189]                                             | [20.5]             |                                                                    |

a. optimized at the ωB97XD/6-311G(d) (SCRF = heptane) level of theory. b. in hartree. c. Zero-point vibrational energy corrections were included. d. at 298.15 K. e. in kJ mol<sup>-1</sup>.

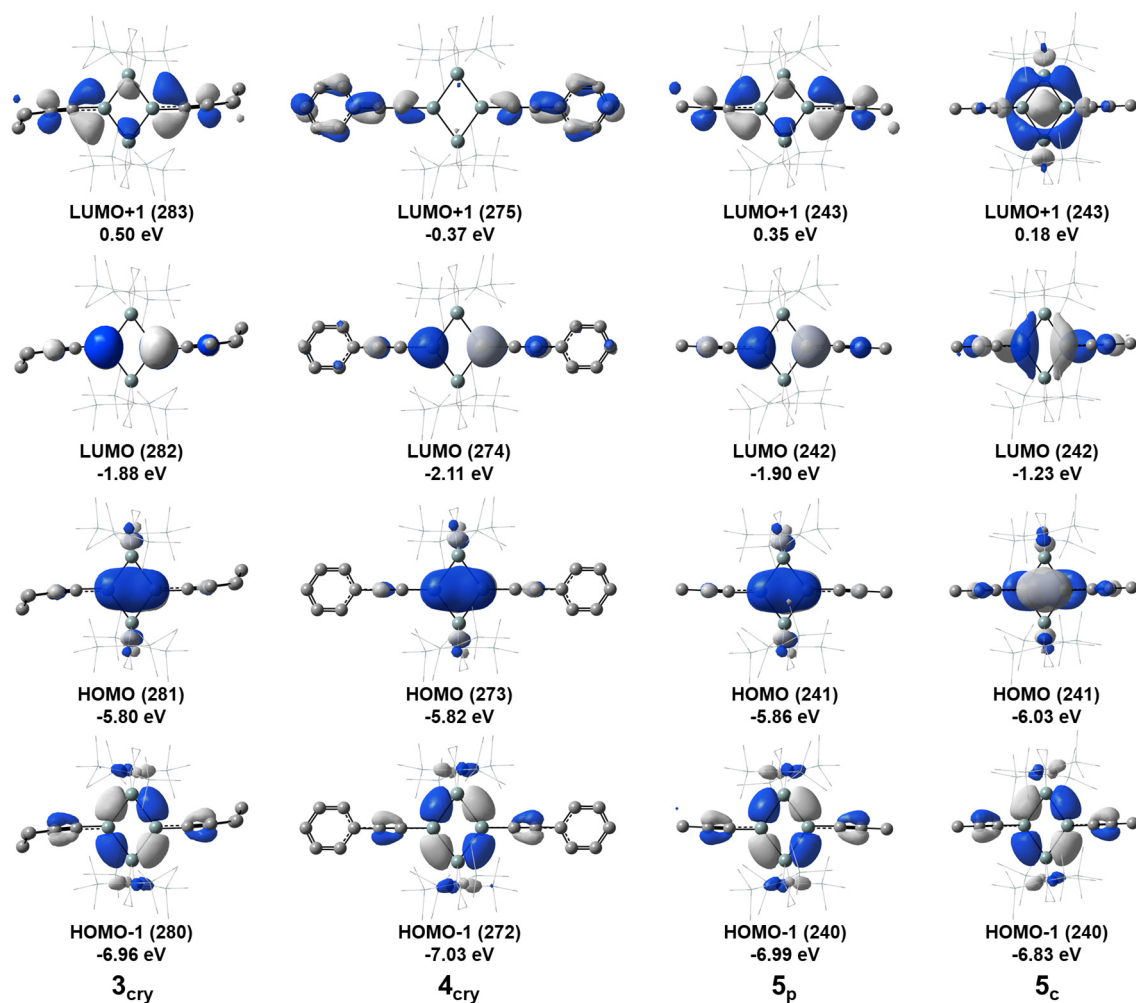

**Figure S26.** Frontier Kohn-Sham orbitals of  $3_{\text{cry}}$ ,  $4_{\text{cry}}$ ,  $5_{\text{p}}$ , and  $5_{\text{c}}$  at the M06-2X/6-311G(d) level of theory.

**Table S6.** Theoretical Isotropic  $^{29}\text{Si}$  Chemical Shifts of  $3_{\text{cry}}$ ,  $4_{\text{cry}}$ ,  $5_{\text{p}}$ ,  $5_{\text{c}}$ ,  $5_{\text{c}}'$ , and  $5_{\text{c}}''$

| Compound                                | SiMe <sub>3</sub>        | Bridge Si     | Bridgehead Si | note              |
|-----------------------------------------|--------------------------|---------------|---------------|-------------------|
| $3_{\text{cry}}^{\text{a,b}}$           | 7.5 (353.9) <sup>c</sup> | -17.1 (378.5) | 137.2 (224.2) | nmrTN120_tn87a2   |
| $4_{\text{cry}}^{\text{a,b}}$           | 8.0 (353.4) <sup>c</sup> | -15.9 (377.3) | 129.9 (231.5) | nmr_TN100_tn53b_a |
| $5_{\text{p}}^{\text{a,b}}$             | 3.6 (357.8) <sup>c</sup> | -21.3 (382.7) | 133.7 (227.7) | nmrTN116db1       |
| $5_{\text{c}}^{\text{a,b}}$             | 2.7 (358.7) <sup>c</sup> | -15.3 (376.7) | -25.7 (387.1) | nmrTN117bb1       |
| $5_{\text{c}}^{\prime\text{a,b}}$       | 3.6 (357.8) <sup>c</sup> | -16.8 (378.2) | -29.4 (390.8) | nmrTN121bb1       |
|                                         |                          | -17.5 (378.9) | -44.9 (406.3) |                   |
| $5_{\text{c}}^{\prime\prime\text{a,b}}$ | 3.7 (357.7) <sup>c</sup> | 18.2 (343.2)  | -27.4 (388.8) | nmrTN124bb1       |

a. GIAO/M06L/6-311+G(2df,p) level of theory. Absolute chemical shift for tetramethylsilane = 361.4.

b. the absolute chemical shift is shown in the parentheses. c. average values.

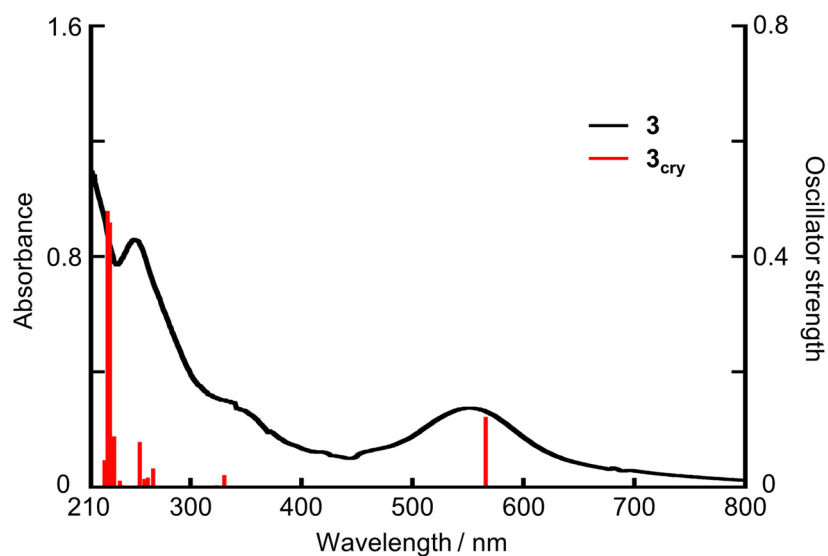

**Figure S27.** Experimental UV-vis absorption spectrum of **3** in a KBr matrix at room temperature (black) and theoretical band positions of **3<sub>cry</sub>** calculated at the TD-M06-2X/6-311G(d) level of theory (red bar). [tdTN120\_tn87a2]

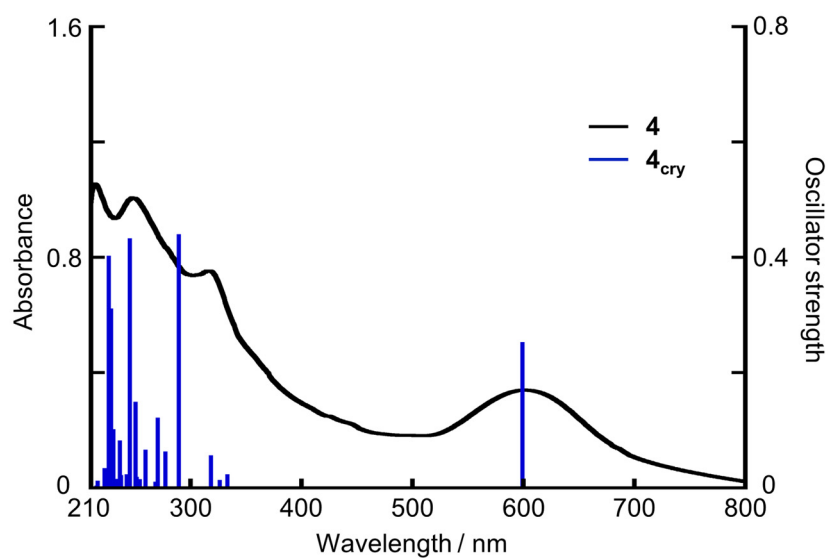

**Figure S28.** Experimental UV-vis absorption spectrum of **4** in a KBr matrix at room temperature (black) and theoretical band positions of **4<sub>cry</sub>** calculated at the TD-M06-2X/6-311G(d) level of theory (blue bar). [td\_TN100\_tn53b\_d]

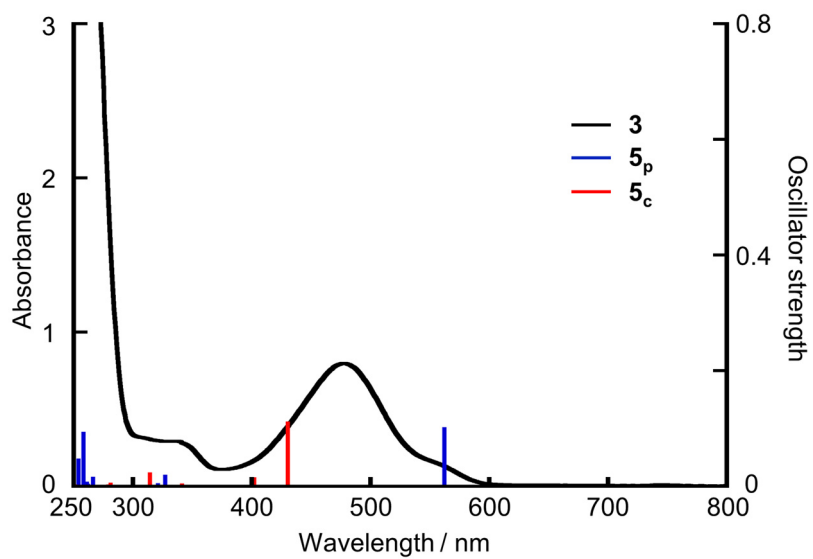

**Figure S29.** Experimental UV-vis absorption spectrum of **3** in 3-methylpentane at 93 K (black) and theoretical band positions of **5<sub>p</sub>** (blue bar) and **5<sub>c</sub>** (red bar) calculated at the TD-M06-2X/6-311G(d) level of theory. [tdTN116db1, tdTN117bb1]



**Table S7.** Transition Energy, Wavelength, and Oscillator Strengths of the Electronic Transition of **3<sub>cr</sub>**  
(The 281<sup>th</sup> orbital is highest occupied orbital shown in Figure S26) [tdTN120\_tn87a2]

|                                                                                   |     |           |           |           |          |                               |     |           |           |           |          |
|-----------------------------------------------------------------------------------|-----|-----------|-----------|-----------|----------|-------------------------------|-----|-----------|-----------|-----------|----------|
| Excited State<br><S**2>=0.000                                                     | 1:  | Singlet-A | 2.1894 eV | 566.29 nm | f=0.1218 | Excited State<br><S**2>=0.000 | 13: | Singlet-A | 4.7722 eV | 259.80 nm | f=0.0142 |
| 281 -> 282                                                                        |     | 0.70400   |           |           |          | 255 -> 282                    |     | -0.12009  |           |           |          |
| This state for optimization and/or second-order correction.                       |     |           |           |           |          |                               |     |           |           |           |          |
| Total Energy, E(TD-HF/TD-KS) = -5365.40034799                                     |     |           |           |           |          |                               |     |           |           |           |          |
| Copying the excited state density for this state as the 1-particle RhoCI density. |     |           |           |           |          |                               |     |           |           |           |          |
| Excited State<br><S**2>=0.000                                                     | 2:  | Singlet-A | 2.4748 eV | 500.98 nm | f=0.0000 | 269 -> 282                    |     | -0.26273  |           |           |          |
| 280 -> 282                                                                        |     | 0.69830   |           |           |          | 270 -> 282                    |     | -0.11321  |           |           |          |
| Excited State<br><S**2>=0.000                                                     | 3:  | Singlet-A | 3.7583 eV | 329.90 nm | f=0.0211 | 274 -> 282                    |     | 0.31873   |           |           |          |
| 272 -> 282                                                                        |     | -0.11190  |           |           |          | 276 -> 282                    |     | -0.21253  |           |           |          |
| 276 -> 282                                                                        |     | -0.14545  |           |           |          | 277 -> 282                    |     | -0.28704  |           |           |          |
| 279 -> 282                                                                        |     | 0.34366   |           |           |          | 281 -> 286                    |     | 0.31550   |           |           |          |
| 281 -> 284                                                                        |     | 0.56640   |           |           |          | 281 -> 287                    |     | 0.12555   |           |           |          |
| Excited State<br><S**2>=0.000                                                     | 4:  | Singlet-A | 3.8429 eV | 322.63 nm | f=0.0034 | Excited State<br><S**2>=0.000 | 14: | Singlet-A | 4.8005 eV | 258.27 nm | f=0.0142 |
| 272 -> 282                                                                        |     | -0.10406  |           |           |          | 255 -> 282                    |     | 0.11407   |           |           |          |
| 279 -> 282                                                                        |     | 0.51078   |           |           |          | 269 -> 282                    |     | 0.23811   |           |           |          |
| 281 -> 284                                                                        |     | -0.38319  |           |           |          | 270 -> 282                    |     | 0.10089   |           |           |          |
| 281 -> 286                                                                        |     | -0.18874  |           |           |          | 274 -> 282                    |     | 0.52493   |           |           |          |
| Excited State<br><S**2>=0.000                                                     | 5:  | Singlet-A | 3.8683 eV | 320.51 nm | f=0.0000 | 277 -> 282                    |     | -0.14357  |           |           |          |
| 281 -> 283                                                                        |     | 0.69629   |           |           |          | 281 -> 286                    |     | -0.19927  |           |           |          |
| Excited State<br><S**2>=0.000                                                     | 6:  | Singlet-A | 3.9886 eV | 310.85 nm | f=0.0005 | 281 -> 287                    |     | -0.13629  |           |           |          |
| 269 -> 282                                                                        |     | -0.11870  |           |           |          | Excited State<br><S**2>=0.000 | 15: | Singlet-A | 4.8771 eV | 254.21 nm | f=0.0782 |
| 272 -> 282                                                                        |     | 0.15346   |           |           |          | 269 -> 282                    |     | 0.14900   |           |           |          |
| 274 -> 282                                                                        |     | 0.16207   |           |           |          | 280 -> 285                    |     | 0.20220   |           |           |          |
| 276 -> 282                                                                        |     | 0.56065   |           |           |          | 281 -> 286                    |     | -0.10455  |           |           |          |
| 277 -> 282                                                                        |     | 0.13700   |           |           |          | 281 -> 287                    |     | 0.61429   |           |           |          |
| 279 -> 282                                                                        |     | 0.19980   |           |           |          | Excited State<br><S**2>=0.000 | 16: | Singlet-A | 5.1165 eV | 242.32 nm | f=0.0000 |
| 281 -> 286                                                                        |     | 0.14294   |           |           |          | 280 -> 284                    |     | 0.66376   |           |           |          |
| Excited State<br><S**2>=0.000                                                     | 7:  | Singlet-A | 4.0500 eV | 306.13 nm | f=0.0000 | 281 -> 288                    |     | 0.11058   |           |           |          |
| 281 -> 285                                                                        |     | 0.70060   |           |           |          | Excited State<br><S**2>=0.000 | 17: | Singlet-A | 5.2006 eV | 238.41 nm | f=0.0000 |
| Excited State<br><S**2>=0.000                                                     | 8:  | Singlet-A | 4.5832 eV | 270.52 nm | f=0.0000 | 259 -> 282                    |     | -0.22107  |           |           |          |
| 278 -> 282                                                                        |     | 0.69377   |           |           |          | 264 -> 282                    |     | 0.21226   |           |           |          |
| Excited State<br><S**2>=0.000                                                     | 9:  | Singlet-A | 4.6547 eV | 266.36 nm | f=0.0325 | 268 -> 282                    |     | -0.29507  |           |           |          |
| 274 -> 282                                                                        |     | 0.22164   |           |           |          | 271 -> 282                    |     | -0.23482  |           |           |          |
| 276 -> 282                                                                        |     | -0.21454  |           |           |          | 273 -> 282                    |     | -0.17298  |           |           |          |
| 277 -> 282                                                                        |     | 0.59868   |           |           |          | 280 -> 284                    |     | -0.11026  |           |           |          |
| 280 -> 283                                                                        |     | -0.12008  |           |           |          | 281 -> 288                    |     | 0.35385   |           |           |          |
| Excited State<br><S**2>=0.000                                                     | 10: | Singlet-A | 4.7524 eV | 260.89 nm | f=0.0164 | Excited State<br><S**2>=0.000 | 18: | Singlet-A | 5.2046 eV | 238.22 nm | f=0.0033 |
| 255 -> 282                                                                        |     | 0.14380   |           |           |          | 270 -> 282                    |     | 0.17445   |           |           |          |
| 269 -> 282                                                                        |     | 0.31318   |           |           |          | 272 -> 282                    |     | 0.58762   |           |           |          |
| 270 -> 282                                                                        |     | 0.14869   |           |           |          | 276 -> 282                    |     | -0.21049  |           |           |          |
| 279 -> 282                                                                        |     | 0.17967   |           |           |          | 279 -> 282                    |     | 0.11894   |           |           |          |
| 281 -> 286                                                                        |     | 0.46183   |           |           |          | 280 -> 283                    |     | 0.11051   |           |           |          |
| 281 -> 289                                                                        |     | 0.15284   |           |           |          | Excited State<br><S**2>=0.000 | 19: | Singlet-A | 5.2604 eV | 235.69 nm | f=0.0115 |
| Excited State<br><S**2>=0.000                                                     | 11: | Singlet-A | 4.7605 eV | 260.44 nm | f=0.0000 | 280 -> 285                    |     | -0.23388  |           |           |          |
| 256 -> 282                                                                        |     | -0.16463  |           |           |          | 281 -> 289                    |     | -0.26698  |           |           |          |
| 257 -> 282                                                                        |     | 0.34415   |           |           |          | 281 -> 291                    |     | 0.55664   |           |           |          |
| 269 -> 288                                                                        |     | 0.11172   |           |           |          | Excited State<br><S**2>=0.000 | 20: | Singlet-A | 5.2709 eV | 235.23 nm | f=0.0000 |
| 273 -> 282                                                                        |     | 0.43028   |           |           |          | 256 -> 282                    |     | 0.12117   |           |           |          |
| 275 -> 282                                                                        |     | -0.30276  |           |           |          | 257 -> 282                    |     | -0.14016  |           |           |          |
| Excited State<br><S**2>=0.000                                                     | 12: | Singlet-A | 4.7677 eV | 260.05 nm | f=0.0000 | 268 -> 282                    |     | 0.15479   |           |           |          |
| 257 -> 282                                                                        |     | 0.13972   |           |           |          | 271 -> 282                    |     | 0.28056   |           |           |          |
| 273 -> 282                                                                        |     | 0.23849   |           |           |          | 273 -> 282                    |     | 0.27884   |           |           |          |
| 275 -> 282                                                                        |     | 0.62722   |           |           |          | 281 -> 288                    |     | 0.48373   |           |           |          |
| Excited State<br><S**2>=0.000                                                     | 21: | Singlet-A | 5.3194 eV | 233.08 nm | f=0.0000 | Excited State<br><S**2>=0.000 | 21: | Singlet-A | 5.3194 eV | 233.08 nm | f=0.0000 |
| 256 -> 282                                                                        |     | 0.15550   |           |           |          | 256 -> 282                    |     | 0.15550   |           |           |          |
| 257 -> 282                                                                        |     | -0.21130  |           |           |          | 257 -> 282                    |     | -0.21130  |           |           |          |
| 259 -> 282                                                                        |     | -0.16737  |           |           |          | 259 -> 282                    |     | -0.16737  |           |           |          |
| 264 -> 282                                                                        |     | 0.29810   |           |           |          | 264 -> 282                    |     | 0.29810   |           |           |          |
| 266 -> 282                                                                        |     | 0.17928   |           |           |          | 266 -> 282                    |     | 0.17928   |           |           |          |
| 268 -> 282                                                                        |     | -0.23600  |           |           |          | 268 -> 282                    |     | -0.23600  |           |           |          |
| 271 -> 282                                                                        |     | 0.17912   |           |           |          | 271 -> 282                    |     | 0.17912   |           |           |          |
| 273 -> 282                                                                        |     | 0.28890   |           |           |          | 273 -> 282                    |     | 0.28890   |           |           |          |
| 281 -> 288                                                                        |     | -0.26773  |           |           |          | 281 -> 288                    |     | -0.26773  |           |           |          |

|               |     |           |           |           |          |               |          |           |           |
|---------------|-----|-----------|-----------|-----------|----------|---------------|----------|-----------|-----------|
| Excited State | 22: | Singlet-A | 5.3742 eV | 230.70 nm | f=0.0880 | 261 -> 282    | 0.52110  |           |           |
| <S**2>=0.000  |     |           |           |           |          | 263 -> 282    | 0.12175  |           |           |
| 258 -> 282    |     | -0.32587  |           |           |          | 266 -> 282    | -0.26795 |           |           |
| 260 -> 282    |     | -0.10605  |           |           |          | 268 -> 282    | -0.23503 |           |           |
| 265 -> 282    |     | -0.17302  |           |           |          | Excited State | 32:      | Singlet-A | 5.7361 eV |
| 267 -> 282    |     | 0.20476   |           |           |          | <S**2>=0.000  |          |           | 216.15 nm |
| 270 -> 282    |     | 0.10968   |           |           |          | 258 -> 282    | 0.33816  |           | f=0.0014  |
| 272 -> 282    |     | -0.16309  |           |           |          | 262 -> 282    | 0.19579  |           |           |
| 274 -> 282    |     | 0.13197   |           |           |          | 265 -> 282    | 0.16902  |           |           |
| 280 -> 283    |     | 0.42104   |           |           |          | 267 -> 282    | 0.48797  |           |           |
|               |     |           |           |           |          | 270 -> 282    | 0.20504  |           |           |
| Excited State | 23: | Singlet-A | 5.4201 eV | 228.75 nm | f=0.0000 | Excited State | 33:      | Singlet-A | 5.8225 eV |
| <S**2>=0.000  |     |           |           |           |          | <S**2>=0.000  |          |           | 212.94 nm |
| 256 -> 282    |     | -0.17279  |           |           |          | 257 -> 282    | 0.12520  |           | f=0.0000  |
| 257 -> 282    |     | 0.23432   |           |           |          | 259 -> 282    | 0.12420  |           |           |
| 263 -> 282    |     | 0.24785   |           |           |          | 261 -> 282    | 0.22432  |           |           |
| 271 -> 282    |     | 0.52129   |           |           |          | 263 -> 282    | -0.31923 |           |           |
| 273 -> 282    |     | -0.21217  |           |           |          | 264 -> 282    | 0.10886  |           |           |
| Excited State | 24: | Singlet-A | 5.4285 eV | 228.39 nm | f=0.0781 | Excited State | 34:      | Singlet-A | 5.8448 eV |
| <S**2>=0.000  |     |           |           |           |          | <S**2>=0.000  |          |           | 212.13 nm |
| 260 -> 282    |     | -0.13783  |           |           |          | 254 -> 282    | 0.10154  |           | f=0.0027  |
| 262 -> 282    |     | -0.13464  |           |           |          | 260 -> 282    | 0.20497  |           |           |
| 267 -> 282    |     | -0.20803  |           |           |          | 262 -> 282    | 0.60464  |           |           |
| 269 -> 282    |     | -0.19029  |           |           |          | 267 -> 282    | -0.23013 |           |           |
| 270 -> 282    |     | 0.52955   |           |           |          | 266 -> 282    | 0.43929  |           |           |
| 272 -> 282    |     | -0.14596  |           |           |          | 280 -> 287    | -0.25035 |           |           |
| 280 -> 283    |     | -0.12165  |           |           |          | Excited State | 35:      | Singlet-A | 5.8712 eV |
| 280 -> 285    |     | 0.17297   |           |           |          | <S**2>=0.000  |          |           | 211.17 nm |
| Excited State | 25: | Singlet-A | 5.4490 eV | 227.53 nm | f=0.4592 | <S**2>=0.000  |          |           | f=0.0000  |
| <S**2>=0.000  |     |           |           |           |          | 261 -> 282    | 0.19107  |           |           |
| 265 -> 282    |     | -0.12161  |           |           |          | 266 -> 282    | 0.20316  |           |           |
| 267 -> 282    |     | 0.12269   |           |           |          | 280 -> 287    | 0.57925  |           |           |
| 270 -> 282    |     | -0.11577  |           |           |          | 280 -> 289    | 0.15781  |           |           |
| 280 -> 285    |     | 0.56332   |           |           |          | Excited State | 36:      | Singlet-A | 5.8878 eV |
| 281 -> 287    |     | -0.17080  |           |           |          | <S**2>=0.000  |          |           | 210.58 nm |
| 281 -> 289    |     | -0.11404  |           |           |          | 281 -> 290    | 0.40951  |           | f=0.0000  |
| 281 -> 291    |     | 0.18586   |           |           |          | 281 -> 292    | -0.35153 |           |           |
| Excited State | 26: | Singlet-A | 5.4997 eV | 225.44 nm | f=0.0000 | 281 -> 293    | 0.13856  |           |           |
| <S**2>=0.000  |     |           |           |           |          | 281 -> 298    | 0.19211  |           |           |
| 280 -> 286    |     | 0.62932   |           |           |          | 281 -> 301    | 0.23320  |           |           |
| 280 -> 289    |     | 0.19356   |           |           |          | 281 -> 302    | 0.17527  |           |           |
| Excited State | 27: | Singlet-A | 5.5168 eV | 224.74 nm | f=0.4792 | Excited State | 37:      | Singlet-A | 5.9040 eV |
| <S**2>=0.000  |     |           |           |           |          | <S**2>=0.000  |          |           | 210.00 nm |
| 258 -> 282    |     | 0.26110   |           |           |          | 260 -> 282    | 0.20922  |           | f=0.0269  |
| 265 -> 282    |     | 0.29279   |           |           |          | 269 -> 282    | -0.13841 |           |           |
| 267 -> 282    |     | -0.19871  |           |           |          | 281 -> 289    | 0.34130  |           |           |
| 280 -> 283    |     | 0.48146   |           |           |          | 281 -> 291    | 0.23239  |           |           |
| 280 -> 285    |     | 0.13678   |           |           |          | 281 -> 294    | -0.21222 |           |           |
| Excited State | 28: | Singlet-A | 5.5678 eV | 222.68 nm | f=0.0000 | 281 -> 296    | -0.28585 |           |           |
| <S**2>=0.000  |     |           |           |           |          | 281 -> 308    | -0.11670 |           |           |
| 259 -> 282    |     | -0.19050  |           |           |          | 281 -> 312    | -0.14696 |           |           |
| 261 -> 282    |     | 0.18507   |           |           |          | Excited State | 38:      | Singlet-A | 5.9217 eV |
| 263 -> 282    |     | 0.14678   |           |           |          | <S**2>=0.000  |          |           | 209.37 nm |
| 264 -> 282    |     | 0.37656   |           |           |          | 260 -> 282    | 0.56885  |           | f=0.0055  |
| 266 -> 282    |     | -0.10314  |           |           |          | 262 -> 282    | -0.17938 |           |           |
| 268 -> 282    |     | 0.48430   |           |           |          | 267 -> 282    | 0.16987  |           |           |
| Excited State | 29: | Singlet-A | 5.5727 eV | 222.48 nm | f=0.0465 | 270 -> 282    | 0.11938  |           |           |
| <S**2>=0.000  |     |           |           |           |          | 281 -> 289    | -0.16570 |           |           |
| 258 -> 282    |     | -0.35256  |           |           |          | Excited State | 39:      | Singlet-A | 5.9401 eV |
| 265 -> 282    |     | 0.56120   |           |           |          | <S**2>=0.000  |          |           | 208.73 nm |
| 267 -> 282    |     | 0.12014   |           |           |          | 259 -> 282    | 0.52188  |           | f=0.0000  |
| 270 -> 282    |     | -0.14496  |           |           |          | 261 -> 282    | -0.23785 |           |           |
| Excited State | 30: | Singlet-A | 5.7273 eV | 216.48 nm | f=0.0000 | 263 -> 282    | 0.19947  |           |           |
| <S**2>=0.000  |     |           |           |           |          | 264 -> 282    | 0.29277  |           |           |
| 261 -> 282    |     | 0.11943   |           |           |          | 271 -> 282    | -0.14241 |           |           |
| 263 -> 282    |     | 0.47840   |           |           |          | Excited State | 40:      | Singlet-A | 5.9778 eV |
| 264 -> 282    |     | -0.29406  |           |           |          | <S**2>=0.000  |          |           | 207.41 nm |
| 266 -> 282    |     | 0.33956   |           |           |          | 281 -> 286    | -0.22638 |           | f=0.0148  |
| 271 -> 282    |     | -0.12746  |           |           |          | 281 -> 289    | 0.41552  |           |           |
| Excited State | 31: | Singlet-A | 5.7308 eV | 216.35 nm | f=0.0000 | 281 -> 291    | 0.19039  |           |           |
| <S**2>=0.000  |     |           |           |           |          | 281 -> 294    | 0.20051  |           |           |
| 256 -> 282    |     | 0.11080   |           |           |          | 281 -> 296    | 0.25911  |           |           |
| 259 -> 282    |     | 0.20557   |           |           |          | 281 -> 297    | -0.13955 |           |           |

|                                   |          |           |           |           |          |                                   |           |           |           |          |
|-----------------------------------|----------|-----------|-----------|-----------|----------|-----------------------------------|-----------|-----------|-----------|----------|
| 281 -> 312                        | 0.13744  |           |           |           |          | Excited State 51:<br><S**2>=0.000 | Singlet-A | 6.3483 eV | 195.30 nm | f=0.0052 |
| Excited State 41:<br><S**2>=0.000 |          | Singlet-A | 6.0316 eV | 205.56 nm | f=0.0071 | 252 -> 282                        | 0.68416   |           |           |          |
| 254 -> 282                        | 0.30898  |           |           |           |          | Excited State 52:<br><S**2>=0.000 | Singlet-A | 6.3488 eV | 195.29 nm | f=0.0000 |
| 255 -> 282                        | -0.29883 |           |           |           |          | 253 -> 282                        | 0.45835   |           |           |          |
| 269 -> 282                        | 0.31892  |           |           |           |          | 258 -> 283                        | -0.10717  |           |           |          |
| 280 -> 288                        | -0.25077 |           |           |           |          | 276 -> 285                        | -0.17048  |           |           |          |
| 281 -> 294                        | -0.11275 |           |           |           |          | 279 -> 283                        | 0.12927   |           |           |          |
| 281 -> 296                        | -0.12536 |           |           |           |          | 279 -> 285                        | -0.38768  |           |           |          |
| Excited State 42:<br><S**2>=0.000 |          | Singlet-A | 6.0476 eV | 205.01 nm | f=0.0000 | 281 -> 292                        | 0.11576   |           |           |          |
| 281 -> 290                        | 0.49939  |           |           |           |          | Excited State 53:<br><S**2>=0.000 | Singlet-A | 6.3696 eV | 194.65 nm | f=0.0090 |
| 281 -> 292                        | 0.30250  |           |           |           |          | 255 -> 282                        | 0.11659   |           |           |          |
| 281 -> 293                        | -0.29032 |           |           |           |          | 258 -> 291                        | -0.13504  |           |           |          |
| 281 -> 301                        | -0.11985 |           |           |           |          | 259 -> 283                        | 0.20693   |           |           |          |
| Excited State 43:<br><S**2>=0.000 |          | Singlet-A | 6.1234 eV | 202.48 nm | f=0.0000 | 264 -> 283                        | -0.19193  |           |           |          |
| 256 -> 282                        | 0.57212  |           |           |           |          | 268 -> 283                        | 0.16221   |           |           |          |
| 257 -> 282                        | 0.36532  |           |           |           |          | 278 -> 285                        | 0.13284   |           |           |          |
| 261 -> 282                        | -0.11366 |           |           |           |          | 280 -> 288                        | 0.31499   |           |           |          |
| Excited State 44:<br><S**2>=0.000 |          | Singlet-A | 6.1365 eV | 202.04 nm | f=0.0134 | 281 -> 295                        | 0.14857   |           |           |          |
| 254 -> 282                        | 0.54152  |           |           |           |          | 281 -> 297                        | 0.10067   |           |           |          |
| 255 -> 282                        | 0.24840  |           |           |           |          | 281 -> 306                        | 0.18517   |           |           |          |
| 260 -> 282                        | -0.15662 |           |           |           |          | Excited State 54:<br><S**2>=0.000 | Singlet-A | 6.4165 eV | 193.23 nm | f=0.0000 |
| 272 -> 282                        | -0.15633 |           |           |           |          | 278 -> 284                        | -0.11736  |           |           |          |
| 279 -> 284                        | -0.10229 |           |           |           |          | 281 -> 290                        | -0.14307  |           |           |          |
| 280 -> 288                        | 0.19146  |           |           |           |          | 281 -> 292                        | 0.15494   |           |           |          |
| Excited State 45:<br><S**2>=0.000 |          | Singlet-A | 6.1659 eV | 201.08 nm | f=0.0025 | 281 -> 293                        | -0.35959  |           |           |          |
| 255 -> 282                        | 0.45960  |           |           |           |          | 281 -> 298                        | 0.45208   |           |           |          |
| 280 -> 288                        | -0.43761 |           |           |           |          | 281 -> 301                        | 0.14164   |           |           |          |
| Excited State 46:<br><S**2>=0.000 |          | Singlet-A | 6.1921 eV | 200.23 nm | f=0.0000 | 281 -> 302                        | 0.14926   |           |           |          |
| 281 -> 292                        | 0.40174  |           |           |           |          | 281 -> 303                        | -0.11872  |           |           |          |
| 281 -> 293                        | 0.47295  |           |           |           |          | Excited State 55:<br><S**2>=0.000 | Singlet-A | 6.4448 eV | 192.38 nm | f=0.6027 |
| 281 -> 298                        | 0.21848  |           |           |           |          | 276 -> 284                        | 0.48132   |           |           |          |
| Excited State 47:<br><S**2>=0.000 |          | Singlet-A | 6.2427 eV | 198.61 nm | f=0.1251 | 277 -> 284                        | 0.17457   |           |           |          |
| 272 -> 284                        | -0.11497 |           |           |           |          | 279 -> 284                        | 0.29965   |           |           |          |
| 274 -> 284                        | -0.10660 |           |           |           |          | 281 -> 294                        | 0.22084   |           |           |          |
| 276 -> 284                        | -0.29830 |           |           |           |          | Excited State 56:<br><S**2>=0.000 | Singlet-A | 6.4861 eV | 191.15 nm | f=0.1196 |
| 279 -> 284                        | 0.54962  |           |           |           |          | 276 -> 284                        | -0.16703  |           |           |          |
| Excited State 48:<br><S**2>=0.000 |          | Singlet-A | 6.2710 eV | 197.71 nm | f=0.0000 | 277 -> 284                        | -0.10127  |           |           |          |
| 256 -> 282                        | -0.10329 |           |           |           |          | 279 -> 284                        | -0.10664  |           |           |          |
| 257 -> 282                        | 0.18860  |           |           |           |          | 281 -> 294                        | 0.45652   |           |           |          |
| 258 -> 283                        | 0.31777  |           |           |           |          | 281 -> 295                        | 0.38594   |           |           |          |
| 259 -> 291                        | -0.12378 |           |           |           |          | 281 -> 297                        | 0.12275   |           |           |          |
| 264 -> 291                        | 0.11510  |           |           |           |          | 281 -> 312                        | -0.10000  |           |           |          |
| 272 -> 283                        | -0.15035 |           |           |           |          | Excited State 57:<br><S**2>=0.000 | Singlet-A | 6.5251 eV | 190.01 nm | f=0.0000 |
| 274 -> 283                        | 0.14571  |           |           |           |          | 251 -> 282                        | -0.18996  |           |           |          |
| 276 -> 283                        | -0.14234 |           |           |           |          | 276 -> 283                        | 0.20785   |           |           |          |
| 277 -> 283                        | 0.15638  |           |           |           |          | 276 -> 285                        | -0.33431  |           |           |          |
| 279 -> 283                        | 0.10981  |           |           |           |          | 280 -> 289                        | -0.18940  |           |           |          |
| 281 -> 298                        | 0.10463  |           |           |           |          | 280 -> 291                        | 0.40090   |           |           |          |
| Excited State 49:<br><S**2>=0.000 |          | Singlet-A | 6.3279 eV | 195.93 nm | f=0.0000 | Excited State 58:<br><S**2>=0.000 | Singlet-A | 6.5429 eV | 189.50 nm | f=0.0000 |
| 253 -> 282                        | -0.13453 |           |           |           |          | 241 -> 282                        | -0.12968  |           |           |          |
| 272 -> 283                        | -0.15667 |           |           |           |          | 249 -> 282                        | 0.11904   |           |           |          |
| 274 -> 283                        | -0.15691 |           |           |           |          | 251 -> 282                        | 0.62977   |           |           |          |
| 276 -> 283                        | -0.30566 |           |           |           |          | 280 -> 291                        | 0.10763   |           |           |          |
| 279 -> 283                        | 0.46880  |           |           |           |          | Excited State 59:<br><S**2>=0.000 | Singlet-A | 6.5593 eV | 189.02 nm | f=0.0012 |
| 280 -> 286                        | 0.11150  |           |           |           |          | 278 -> 285                        | 0.11749   |           |           |          |
| 280 -> 291                        | 0.12557  |           |           |           |          | 281 -> 294                        | -0.29651  |           |           |          |
| Excited State 50:<br><S**2>=0.000 |          | Singlet-A | 6.3397 eV | 195.57 nm | f=0.0000 | 281 -> 295                        | 0.31558   |           |           |          |
| 253 -> 282                        | 0.47822  |           |           |           |          | 281 -> 296                        | 0.41927   |           |           |          |
| 276 -> 285                        | 0.17198  |           |           |           |          | 281 -> 305                        | 0.13950   |           |           |          |
| 279 -> 285                        | 0.42721  |           |           |           |          | Excited State 60:<br><S**2>=0.000 | Singlet-A | 6.6176 eV | 187.36 nm | f=0.0000 |
| 280 -> 291                        | 0.10679  |           |           |           |          | 275 -> 284                        | 0.11561   |           |           |          |
|                                   |          |           |           |           |          | 276 -> 283                        | -0.12246  |           |           |          |
|                                   |          |           |           |           |          | 276 -> 285                        | -0.14926  |           |           |          |

|               |          |           |           |           |          |               |          |           |           |           |          |
|---------------|----------|-----------|-----------|-----------|----------|---------------|----------|-----------|-----------|-----------|----------|
| 278 -> 284    | 0.56146  |           |           |           |          | 281 -> 304    | 0.16239  |           |           |           |          |
| 281 -> 298    | 0.18486  |           |           |           |          | 281 -> 311    | 0.10881  |           |           |           |          |
| Excited State | 61:      | Singlet-A | 6.6351 eV | 186.86 nm | f=0.0162 | Excited State | 63:      | Singlet-A | 6.6607 eV | 186.14 nm | f=0.0311 |
| <S**2>=0.000  |          |           |           |           |          | <S**2>=0.000  |          |           |           |           |          |
| 274 -> 284    | -0.12304 |           |           |           |          | 274 -> 284    | -0.11544 |           |           |           |          |
| 276 -> 284    | -0.11128 |           |           |           |          | 277 -> 284    | 0.37873  |           |           |           |          |
| 277 -> 284    | 0.24624  |           |           |           |          | 278 -> 285    | 0.10598  |           |           |           |          |
| 278 -> 285    | 0.31532  |           |           |           |          | 281 -> 295    | 0.21505  |           |           |           |          |
| 281 -> 295    | -0.28166 |           |           |           |          | 281 -> 296    | -0.22102 |           |           |           |          |
| 281 -> 297    | 0.31211  |           |           |           |          | 281 -> 297    | -0.37123 |           |           |           |          |
| 281 -> 306    | 0.12596  |           |           |           |          | 281 -> 305    | -0.10152 |           |           |           |          |
|               |          |           |           |           |          | 281 -> 308    | 0.12553  |           |           |           |          |
| Excited State | 62:      | Singlet-A | 6.6603 eV | 186.15 nm | f=0.0001 | Excited State | 64:      | Singlet-A | 6.6885 eV | 185.37 nm | f=0.0073 |
| <S**2>=0.000  |          |           |           |           |          | <S**2>=0.000  |          |           |           |           |          |
| 275 -> 284    | 0.14674  |           |           |           |          | 276 -> 284    | -0.11548 |           |           |           |          |
| 276 -> 283    | 0.15403  |           |           |           |          | 277 -> 284    | 0.36359  |           |           |           |          |
| 276 -> 285    | 0.28218  |           |           |           |          | 278 -> 283    | 0.16130  |           |           |           |          |
| 278 -> 284    | 0.17577  |           |           |           |          | 278 -> 285    | -0.34302 |           |           |           |          |
| 279 -> 283    | 0.15394  |           |           |           |          | 281 -> 296    | 0.12392  |           |           |           |          |
| 281 -> 300    | 0.28868  |           |           |           |          | 281 -> 297    | 0.23002  |           |           |           |          |
| 281 -> 301    | 0.20141  |           |           |           |          | 281 -> 306    | -0.15532 |           |           |           |          |
| 281 -> 302    | 0.20002  |           |           |           |          |               |          |           |           |           |          |

**Table S8.** Transition Energy, Wavelength, and Oscillator Strengths of the Electronic Transition of **4<sub>cr</sub>** (The 273<sup>th</sup> orbital is highest occupied orbital shown in Figure S26) [td\_TN100\_tn53b\_d]

|                                                                                   |          |           |           |           |          |               |          |           |           |           |          |
|-----------------------------------------------------------------------------------|----------|-----------|-----------|-----------|----------|---------------|----------|-----------|-----------|-----------|----------|
| Excited State                                                                     | 1:       | Singlet-A | 2.0683 eV | 599.46 nm | f=0.2531 | <S**2>=0.000  |          |           |           |           |          |
| <S**2>=0.000                                                                      |          |           |           |           |          | 273 -> 275    | -0.38431 |           |           |           |          |
| 273 -> 274                                                                        | 0.70253  |           |           |           |          | 273 -> 277    | 0.41740  |           |           |           |          |
| This state for optimization and/or second-order correction.                       |          |           |           |           |          |               |          |           |           |           |          |
| Total Energy, E(TD-HF/TD-KS) = -5355.85581669                                     |          |           |           |           |          |               |          |           |           |           |          |
| Copying the excited state density for this state as the 1-particle RhoCI density. |          |           |           |           |          |               |          |           |           |           |          |
| Excited State                                                                     | 2:       | Singlet-A | 2.4338 eV | 509.42 nm | f=0.0000 | Excited State | 9:       | Singlet-A | 4.2873 eV | 289.19 nm | f=0.4400 |
| <S**2>=0.000                                                                      |          |           |           |           |          | <S**2>=0.000  |          |           |           |           |          |
| 272 -> 274                                                                        | 0.69128  |           |           |           |          | 265 -> 274    | 0.24723  |           |           |           |          |
| Excited State                                                                     | 3:       | Singlet-A | 3.5927 eV | 345.10 nm | f=0.0000 | Excited State | 10:      | Singlet-A | 4.3311 eV | 286.26 nm | f=0.0000 |
| <S**2>=0.000                                                                      |          |           |           |           |          | <S**2>=0.000  |          |           |           |           |          |
| 273 -> 275                                                                        | 0.54687  |           |           |           |          | 240 -> 274    | 0.10632  |           |           |           |          |
| 273 -> 277                                                                        | 0.39382  |           |           |           |          | 270 -> 274    | 0.64426  |           |           |           |          |
| 273 -> 280                                                                        | -0.14822 |           |           |           |          | Excited State | 11:      | Singlet-A | 4.4757 eV | 277.02 nm | f=0.0634 |
| Excited State                                                                     | 4:       | Singlet-A | 3.7244 eV | 332.90 nm | f=0.0235 | <S**2>=0.000  |          |           |           |           |          |
| <S**2>=0.000                                                                      |          |           |           |           |          | 244 -> 274    | 0.10564  |           |           |           |          |
| 260 -> 274                                                                        | 0.10504  |           |           |           |          | 264 -> 274    | -0.14064 |           |           |           |          |
| 265 -> 274                                                                        | -0.11439 |           |           |           |          | 265 -> 274    | 0.13539  |           |           |           |          |
| 269 -> 274                                                                        | -0.37159 |           |           |           |          | 272 -> 275    | 0.11886  |           |           |           |          |
| 273 -> 276                                                                        | 0.15090  |           |           |           |          | 273 -> 276    | 0.55163  |           |           |           |          |
| 273 -> 278                                                                        | 0.52565  |           |           |           |          | 273 -> 278    | -0.11255 |           |           |           |          |
| Excited State                                                                     | 5:       | Singlet-A | 3.8058 eV | 325.78 nm | f=0.0139 | Excited State | 12:      | Singlet-A | 4.4769 eV | 276.94 nm | f=0.0000 |
| <S**2>=0.000                                                                      |          |           |           |           |          | <S**2>=0.000  |          |           |           |           |          |
| 269 -> 274                                                                        | 0.46444  |           |           |           |          | 268 -> 274    | 0.68956  |           |           |           |          |
| 271 -> 274                                                                        | 0.17930  |           |           |           |          | Excited State | 13:      | Singlet-A | 4.5948 eV | 269.83 nm | f=0.1220 |
| 273 -> 278                                                                        | 0.39781  |           |           |           |          | <S**2>=0.000  |          |           |           |           |          |
| 273 -> 282                                                                        | -0.16517 |           |           |           |          | 244 -> 274    | 0.14681  |           |           |           |          |
| Excited State                                                                     | 6:       | Singlet-A | 3.8962 eV | 318.22 nm | f=0.0566 | Excited State | 14:      | Singlet-A | 4.6313 eV | 267.71 nm | f=0.0106 |
| <S**2>=0.000                                                                      |          |           |           |           |          | <S**2>=0.000  |          |           |           |           |          |
| 254 -> 274                                                                        | -0.11254 |           |           |           |          | 244 -> 274    | -0.10742 |           |           |           |          |
| 260 -> 274                                                                        | -0.12464 |           |           |           |          | 253 -> 274    | -0.11278 |           |           |           |          |
| 265 -> 274                                                                        | 0.40284  |           |           |           |          | 254 -> 274    | -0.12052 |           |           |           |          |
| 267 -> 274                                                                        | -0.30580 |           |           |           |          |               |          |           |           |           |          |
| 271 -> 274                                                                        | -0.34001 |           |           |           |          |               |          |           |           |           |          |
| 272 -> 275                                                                        | -0.10428 |           |           |           |          |               |          |           |           |           |          |
| 273 -> 278                                                                        | 0.12889  |           |           |           |          |               |          |           |           |           |          |
| 273 -> 282                                                                        | -0.12747 |           |           |           |          |               |          |           |           |           |          |
| Excited State                                                                     | 7:       | Singlet-A | 4.0407 eV | 306.84 nm | f=0.0000 | Excited State | 14:      | Singlet-A | 4.6313 eV | 267.71 nm | f=0.0106 |
| <S**2>=0.000                                                                      |          |           |           |           |          | <S**2>=0.000  |          |           |           |           |          |
| 273 -> 275                                                                        | -0.16230 |           |           |           |          | 244 -> 274    | -0.10742 |           |           |           |          |
| 273 -> 277                                                                        | 0.29352  |           |           |           |          | 253 -> 274    | -0.11278 |           |           |           |          |
| 273 -> 280                                                                        | -0.16112 |           |           |           |          | 254 -> 274    | -0.12052 |           |           |           |          |
| 273 -> 281                                                                        | 0.59153  |           |           |           |          |               |          |           |           |           |          |
| Excited State                                                                     | 8:       | Singlet-A | 4.2487 eV | 291.81 nm | f=0.0000 |               |          |           |           |           |          |

|                   |          |           |           |           |          |                   |           |           |           |          |
|-------------------|----------|-----------|-----------|-----------|----------|-------------------|-----------|-----------|-----------|----------|
| 264 -> 274        | 0.16503  |           |           |           |          | Excited State 23: | Singlet-A | 5.0972 eV | 243.24 nm | f=0.0000 |
| 265 -> 274        | 0.33405  |           |           |           |          | <S**2>=0.000      |           |           |           |          |
| 267 -> 274        | 0.46356  |           |           |           |          | 272 -> 276        | 0.19025   |           |           |          |
| 272 -> 275        | -0.19983 |           |           |           |          | 272 -> 278        | 0.64463   |           |           |          |
| 273 -> 276        | 0.15259  |           |           |           |          |                   |           |           |           |          |
| Excited State 15: |          | Singlet-A | 4.6386 eV | 267.29 nm | f=0.0000 | Excited State 24: | Singlet-A | 5.1128 eV | 242.50 nm | f=0.0000 |
| <S**2>=0.000      |          |           |           |           |          | <S**2>=0.000      |           |           |           |          |
| 261 -> 274        | 0.16217  |           |           |           |          | 243 -> 274        | -0.11701  |           |           |          |
| 266 -> 274        | 0.65404  |           |           |           |          | 246 -> 274        | 0.21341   |           |           |          |
| Excited State 16: |          | Singlet-A | 4.7365 eV | 261.76 nm | f=0.0000 | 247 -> 274        | 0.10981   |           |           |          |
| <S**2>=0.000      |          |           |           |           |          | 257 -> 274        | 0.13996   |           |           |          |
| 244 -> 275        | -0.10417 |           |           |           |          | 259 -> 274        | 0.23793   |           |           |          |
| 246 -> 274        | -0.23948 |           |           |           |          | 261 -> 274        | 0.51016   |           |           |          |
| 247 -> 274        | -0.25549 |           |           |           |          | 272 -> 276        | 0.18470   |           |           |          |
| 253 -> 275        | -0.12415 |           |           |           |          | Excited State 25: | Singlet-A | 5.1273 eV | 241.81 nm | f=0.0237 |
| 261 -> 274        | 0.39774  |           |           |           |          | <S**2>=0.000      |           |           |           |          |
| 266 -> 274        | -0.24187 |           |           |           |          | 245 -> 274        | -0.15853  |           |           |          |
| 270 -> 274        | 0.14825  |           |           |           |          | 258 -> 274        | 0.28933   |           |           |          |
| 272 -> 276        | -0.14520 |           |           |           |          | 260 -> 274        | 0.51652   |           |           |          |
| Excited State 17: |          | Singlet-A | 4.7933 eV | 258.66 nm | f=0.0664 | 265 -> 274        | 0.12933   |           |           |          |
| <S**2>=0.000      |          |           |           |           |          | 269 -> 274        | 0.14885   |           |           |          |
| 264 -> 274        | -0.22088 |           |           |           |          | 272 -> 275        | 0.15755   |           |           |          |
| 265 -> 274        | 0.10323  |           |           |           |          | 273 -> 282        | -0.13633  |           |           |          |
| 269 -> 274        | 0.18215  |           |           |           |          | Excited State 26: | Singlet-A | 5.2284 eV | 237.13 nm | f=0.0000 |
| 273 -> 278        | 0.11476  |           |           |           |          | <S**2>=0.000      |           |           |           |          |
| 273 -> 282        | 0.56737  |           |           |           |          | 259 -> 274        | -0.13017  |           |           |          |
| 273 -> 285        | -0.10833 |           |           |           |          | 262 -> 275        | -0.11177  |           |           |          |
| Excited State 18: |          | Singlet-A | 4.8816 eV | 253.98 nm | f=0.0153 | 263 -> 274        | -0.43140  |           |           |          |
| <S**2>=0.000      |          |           |           |           |          | 273 -> 277        | 0.18603   |           |           |          |
| 244 -> 274        | 0.12292  |           |           |           |          | 273 -> 280        | 0.48043   |           |           |          |
| 253 -> 274        | 0.14658  |           |           |           |          | Excited State 27: | Singlet-A | 5.2293 eV | 237.09 nm | f=0.0222 |
| 254 -> 274        | 0.10206  |           |           |           |          | <S**2>=0.000      |           |           |           |          |
| 264 -> 274        | 0.53631  |           |           |           |          | 262 -> 274        | -0.43459  |           |           |          |
| 265 -> 274        | 0.13823  |           |           |           |          | 263 -> 275        | -0.11707  |           |           |          |
| 272 -> 275        | 0.22937  |           |           |           |          | 273 -> 279        | 0.52004   |           |           |          |
| 273 -> 282        | 0.17956  |           |           |           |          | Excited State 28: | Singlet-A | 5.2635 eV | 235.55 nm | f=0.0821 |
| Excited State 19: |          | Singlet-A | 4.9323 eV | 251.37 nm | f=0.0192 | <S**2>=0.000      |           |           |           |          |
| <S**2>=0.000      |          |           |           |           |          | 253 -> 274        | 0.11331   |           |           |          |
| 262 -> 274        | 0.36958  |           |           |           |          | 270 -> 277        | 0.12019   |           |           |          |
| 262 -> 276        | 0.13036  |           |           |           |          | 273 -> 276        | 0.17137   |           |           |          |
| 263 -> 275        | 0.19007  |           |           |           |          | 273 -> 283        | -0.11467  |           |           |          |
| 270 -> 280        | -0.14392 |           |           |           |          | 273 -> 284        | 0.58527   |           |           |          |
| 271 -> 279        | -0.13658 |           |           |           |          | Excited State 29: | Singlet-A | 5.2682 eV | 235.35 nm | f=0.0000 |
| 273 -> 279        | 0.40983  |           |           |           |          | <S**2>=0.000      |           |           |           |          |
| 273 -> 283        | 0.23572  |           |           |           |          | 246 -> 274        | -0.12746  |           |           |          |
| Excited State 20: |          | Singlet-A | 4.9356 eV | 251.20 nm | f=0.0000 | 249 -> 274        | 0.12082   |           |           |          |
| <S**2>=0.000      |          |           |           |           |          | 250 -> 274        | 0.12985   |           |           |          |
| 262 -> 275        | 0.21034  |           |           |           |          | 259 -> 274        | 0.58375   |           |           |          |
| 263 -> 274        | 0.40911  |           |           |           |          | 261 -> 274        | -0.12718  |           |           |          |
| 263 -> 276        | 0.14436  |           |           |           |          | 272 -> 276        | -0.11797  |           |           |          |
| 270 -> 279        | -0.17070 |           |           |           |          | 273 -> 280        | 0.10418   |           |           |          |
| 271 -> 280        | -0.14071 |           |           |           |          | Excited State 30: | Singlet-A | 5.3128 eV | 233.37 nm | f=0.0157 |
| 273 -> 277        | 0.15536  |           |           |           |          | <S**2>=0.000      |           |           |           |          |
| 273 -> 280        | 0.40836  |           |           |           |          | 248 -> 274        | 0.12693   |           |           |          |
| Excited State 21: |          | Singlet-A | 4.9528 eV | 250.33 nm | f=0.1494 | 251 -> 274        | 0.12770   |           |           |          |
| <S**2>=0.000      |          |           |           |           |          | 254 -> 274        | 0.26577   |           |           |          |
| 253 -> 274        | -0.10538 |           |           |           |          | 256 -> 274        | 0.12034   |           |           |          |
| 262 -> 274        | -0.17485 |           |           |           |          | 258 -> 274        | 0.51968   |           |           |          |
| 272 -> 275        | 0.14065  |           |           |           |          | 260 -> 274        | -0.29434  |           |           |          |
| 272 -> 281        | -0.22063 |           |           |           |          | Excited State 31: | Singlet-A | 5.3854 eV | 230.22 nm | f=0.1019 |
| 273 -> 279        | -0.15687 |           |           |           |          | <S**2>=0.000      |           |           |           |          |
| 273 -> 283        | 0.51844  |           |           |           |          | 251 -> 274        | 0.17423   |           |           |          |
| 273 -> 284        | 0.11692  |           |           |           |          | 253 -> 274        | -0.18172  |           |           |          |
| Excited State 22: |          | Singlet-A | 5.0674 eV | 244.67 nm | f=0.4331 | 254 -> 274        | 0.40137   |           |           |          |
| <S**2>=0.000      |          |           |           |           |          | 256 -> 274        | -0.35521  |           |           |          |
| 244 -> 274        | -0.12720 |           |           |           |          | 258 -> 274        | -0.12376  |           |           |          |
| 253 -> 274        | -0.22746 |           |           |           |          | 272 -> 277        | 0.25605   |           |           |          |
| 254 -> 274        | -0.14857 |           |           |           |          | 272 -> 280        | -0.11000  |           |           |          |
| 260 -> 274        | -0.19832 |           |           |           |          | 272 -> 281        | 0.13620   |           |           |          |
| 272 -> 275        | 0.43787  |           |           |           |          | Excited State 32: | Singlet-A | 5.4184 eV | 228.82 nm | f=0.0000 |
| 272 -> 277        | 0.19371  |           |           |           |          | <S**2>=0.000      |           |           |           |          |
| 273 -> 276        | 0.13478  |           |           |           |          | 249 -> 274        | -0.12238  |           |           |          |
| 273 -> 283        | -0.22155 |           |           |           |          | 250 -> 274        | 0.17424   |           |           |          |
|                   |          |           |           |           |          | 255 -> 274        | -0.37302  |           |           |          |

|                               |          |           |           |           |                               |                               |           |           |           |           |          |
|-------------------------------|----------|-----------|-----------|-----------|-------------------------------|-------------------------------|-----------|-----------|-----------|-----------|----------|
| 257 -> 274                    | 0.52913  |           |           |           | 256 -> 274                    | -0.13613                      |           |           |           |           |          |
| Excited State<br><S**2>=0.000 | 33:      | Singlet-A | 5.4380 eV | 227.99 nm | f=0.3114                      | Excited State<br><S**2>=0.000 | 42:       | Singlet-A | 5.7390 eV | 216.04 nm | f=0.0124 |
| 253 -> 274                    | 0.24587  |           |           |           | 248 -> 274                    | -0.12415                      |           |           |           |           |          |
| 256 -> 274                    | 0.32589  |           |           |           | 251 -> 274                    | -0.16540                      |           |           |           |           |          |
| 272 -> 277                    | 0.41967  |           |           |           | 253 -> 274                    | 0.12666                       |           |           |           |           |          |
| 272 -> 280                    | -0.17266 |           |           |           | 254 -> 274                    | 0.15114                       |           |           |           |           |          |
| 272 -> 281                    | 0.23404  |           |           |           | 270 -> 275                    | 0.32965                       |           |           |           |           |          |
| 273 -> 283                    | 0.10571  |           |           |           | 270 -> 277                    | 0.24024                       |           |           |           |           |          |
| Excited State<br><S**2>=0.000 | 34:      | Singlet-A | 5.4938 eV | 225.68 nm | f=0.0000                      | 271 -> 276                    | 0.18350   |           |           |           |          |
| 246 -> 274                    | -0.11081 |           |           |           | 271 -> 284                    | -0.14148                      |           |           |           |           |          |
| 247 -> 274                    | -0.11556 |           |           |           | 272 -> 277                    | -0.16006                      |           |           |           |           |          |
| 250 -> 274                    | 0.13920  |           |           |           | 273 -> 284                    | -0.17410                      |           |           |           |           |          |
| 271 -> 275                    | 0.11689  |           |           |           | Excited State<br><S**2>=0.000 | 43:                           | Singlet-A | 5.7409 eV | 215.97 nm | f=0.0000  |          |
| 272 -> 276                    | 0.29163  |           |           |           | 246 -> 274                    | -0.10380                      |           |           |           |           |          |
| 272 -> 278                    | -0.15754 |           |           |           | 249 -> 274                    | 0.42952                       |           |           |           |           |          |
| 272 -> 282                    | 0.48426  |           |           |           | 250 -> 274                    | 0.14144                       |           |           |           |           |          |
| 272 -> 285                    | -0.11498 |           |           |           | 252 -> 274                    | -0.25499                      |           |           |           |           |          |
| Excited State<br><S**2>=0.000 | 35:      | Singlet-A | 5.4973 eV | 225.54 nm | f=0.4028                      | 271 -> 277                    | -0.13252  |           |           |           |          |
| 254 -> 274                    | -0.12611 |           |           |           | 272 -> 276                    | 0.24702                       |           |           |           |           |          |
| 256 -> 274                    | -0.11193 |           |           |           | 272 -> 282                    | -0.17311                      |           |           |           |           |          |
| 272 -> 277                    | -0.21578 |           |           |           | 272 -> 283                    | 0.10966                       |           |           |           |           |          |
| 272 -> 281                    | 0.56595  |           |           |           | Excited State<br><S**2>=0.000 | 44:                           | Singlet-A | 5.7632 eV | 215.13 nm | f=0.0040  |          |
| 273 -> 283                    | 0.16371  |           |           |           | 248 -> 274                    | 0.62640                       |           |           |           |           |          |
| 273 -> 284                    | 0.13853  |           |           |           | 253 -> 274                    | -0.16431                      |           |           |           |           |          |
| Excited State<br><S**2>=0.000 | 36:      | Singlet-A | 5.5617 eV | 222.93 nm | f=0.0000                      | 258 -> 274                    | -0.15993  |           |           |           |          |
| 249 -> 274                    | -0.27670 |           |           |           | Excited State<br><S**2>=0.000 | 45:                           | Singlet-A | 5.8018 eV | 213.70 nm | f=0.0000  |          |
| 250 -> 274                    | 0.49449  |           |           |           | 246 -> 274                    | 0.21220                       |           |           |           |           |          |
| 252 -> 274                    | -0.17830 |           |           |           | 247 -> 274                    | 0.24676                       |           |           |           |           |          |
| 255 -> 274                    | -0.13013 |           |           |           | 249 -> 274                    | 0.38089                       |           |           |           |           |          |
| 257 -> 274                    | -0.29882 |           |           |           | 250 -> 274                    | 0.16967                       |           |           |           |           |          |
| Excited State<br><S**2>=0.000 | 37:      | Singlet-A | 5.5740 eV | 222.43 nm | f=0.0000                      | 252 -> 274                    | -0.10737  |           |           |           |          |
| 250 -> 274                    | 0.34925  |           |           |           | 271 -> 275                    | 0.11154                       |           |           |           |           |          |
| 252 -> 274                    | 0.38873  |           |           |           | 271 -> 277                    | 0.12008                       |           |           |           |           |          |
| 255 -> 274                    | 0.40334  |           |           |           | 272 -> 276                    | -0.24832                      |           |           |           |           |          |
| 257 -> 274                    | 0.14675  |           |           |           | 272 -> 282                    | 0.12781                       |           |           |           |           |          |
| 259 -> 274                    | -0.14025 |           |           |           | Excited State<br><S**2>=0.000 | 46:                           | Singlet-A | 5.8960 eV | 210.29 nm | f=0.0059  |          |
| Excited State<br><S**2>=0.000 | 38:      | Singlet-A | 5.5806 eV | 222.17 nm | f=0.0345                      | 262 -> 274                    | 0.29265   |           |           |           |          |
| 248 -> 274                    | -0.15605 |           |           |           | 262 -> 275                    | -0.12286                      |           |           |           |           |          |
| 251 -> 274                    | 0.29035  |           |           |           | 262 -> 276                    | -0.19634                      |           |           |           |           |          |
| 253 -> 274                    | -0.15843 |           |           |           | 263 -> 274                    | 0.17447                       |           |           |           |           |          |
| 254 -> 274                    | 0.21893  |           |           |           | 263 -> 275                    | -0.21203                      |           |           |           |           |          |
| 256 -> 274                    | 0.44610  |           |           |           | 263 -> 276                    | -0.11716                      |           |           |           |           |          |
| 258 -> 274                    | -0.20065 |           |           |           | 270 -> 279                    | 0.12934                       |           |           |           |           |          |
| 260 -> 274                    | 0.14024  |           |           |           | 270 -> 280                    | 0.20690                       |           |           |           |           |          |
| 272 -> 277                    | -0.16720 |           |           |           | 271 -> 279                    | 0.22638                       |           |           |           |           |          |
| Excited State<br><S**2>=0.000 | 39:      | Singlet-A | 5.6223 eV | 220.52 nm | f=0.0000                      | 271 -> 280                    | 0.12160   |           |           |           |          |
| 270 -> 276                    | -0.17862 |           |           |           | 272 -> 279                    | 0.11044                       |           |           |           |           |          |
| 270 -> 284                    | 0.12113  |           |           |           | 272 -> 280                    | 0.16906                       |           |           |           |           |          |
| 271 -> 275                    | -0.32318 |           |           |           | 273 -> 279                    | 0.12644                       |           |           |           |           |          |
| 271 -> 277                    | -0.22009 |           |           |           | Excited State<br><S**2>=0.000 | 47:                           | Singlet-A | 5.8961 eV | 210.28 nm | f=0.0021  |          |
| 272 -> 276                    | -0.23978 |           |           |           | 262 -> 274                    | -0.17421                      |           |           |           |           |          |
| 272 -> 282                    | 0.33186  |           |           |           | 262 -> 275                    | -0.21076                      |           |           |           |           |          |
| Excited State<br><S**2>=0.000 | 40:      | Singlet-A | 5.6594 eV | 219.08 nm | f=0.0000                      | 262 -> 276                    | 0.11684   |           |           |           |          |
| 249 -> 274                    | 0.18843  |           |           |           | 263 -> 274                    | 0.29297                       |           |           |           |           |          |
| 252 -> 274                    | 0.47396  |           |           |           | 263 -> 275                    | 0.12368                       |           |           |           |           |          |
| 255 -> 274                    | -0.38436 |           |           |           | 263 -> 276                    | -0.19668                      |           |           |           |           |          |
| 257 -> 274                    | -0.22993 |           |           |           | 270 -> 279                    | 0.21856                       |           |           |           |           |          |
| 259 -> 274                    | 0.10188  |           |           |           | 270 -> 280                    | -0.12237                      |           |           |           |           |          |
| Excited State<br><S**2>=0.000 | 41:      | Singlet-A | 5.6771 eV | 218.39 nm | f=0.0006                      | 271 -> 279                    | -0.13292  |           |           |           |          |
| 244 -> 274                    | -0.10403 |           |           |           | 271 -> 280                    | 0.20728                       |           |           |           |           |          |
| 248 -> 274                    | 0.10779  |           |           |           | 272 -> 279                    | 0.18683                       |           |           |           |           |          |
| 251 -> 274                    | 0.54505  |           |           |           | 272 -> 280                    | -0.10009                      |           |           |           |           |          |
| 253 -> 274                    | 0.31186  |           |           |           | 273 -> 280                    | 0.11795                       |           |           |           |           |          |
| 254 -> 274                    | -0.16582 |           |           |           | Excited State<br><S**2>=0.000 | 48:                           | Singlet-A | 5.9102 eV | 209.78 nm | f=0.0000  |          |
|                               |          |           |           |           | 269 -> 275                    | -0.20496                      |           |           |           |           |          |
|                               |          |           |           |           | 272 -> 276                    | -0.10083                      |           |           |           |           |          |
|                               |          |           |           |           | 272 -> 283                    | 0.55473                       |           |           |           |           |          |
|                               |          |           |           |           | 272 -> 284                    | 0.12467                       |           |           |           |           |          |

**Table S9.** Transition Energy, Wavelength, and Oscillator Strengths of the Electronic Transition of **5<sub>p</sub>**  
(The 241<sup>th</sup> orbital is highest occupied orbital shown in Figure S26) [tdTN116db1]

|                                                                                   |            |                |           |          |                                   |            |           |           |          |
|-----------------------------------------------------------------------------------|------------|----------------|-----------|----------|-----------------------------------|------------|-----------|-----------|----------|
| Excited State 1:<br><S**2>=0.000                                                  | Singlet-AU | 2.2067 eV      | 561.84 nm | f=0.1023 | 230 -> 242                        | -0.11841   |           |           |          |
| 241 -> 242                                                                        | 0.70320    |                |           |          | 231 -> 248                        | 0.10068    |           |           |          |
| This state for optimization and/or second-order correction.                       |            |                |           |          | 233 -> 242                        | 0.35785    |           |           |          |
| Total Energy, E(TD-HF/TD-KS) =                                                    |            | -4973.38334234 |           |          | 236 -> 242                        | 0.45293    |           |           |          |
| Copying the excited state density for this state as the 1-particle RhoCI density. |            |                |           |          | 238 -> 242                        | -0.12637   |           |           |          |
| Excited State 2:<br><S**2>=0.000                                                  | Singlet-AG | 2.4947 eV      | 496.98 nm | f=0.0000 | Excited State 13:<br><S**2>=0.000 | Singlet-AU | 4.7500 eV | 261.02 nm | f=0.0082 |
| 240 -> 242                                                                        | 0.69761    |                |           |          | 234 -> 242                        | 0.53368    |           |           |          |
| Excited State 3:<br><S**2>=0.000                                                  | Singlet-AU | 3.7962 eV      | 326.60 nm | f=0.0203 | 235 -> 242                        | 0.10919    |           |           |          |
| 232 -> 242                                                                        | -0.11554   |                |           |          | 237 -> 242                        | 0.39784    |           |           |          |
| 239 -> 242                                                                        | 0.40747    |                |           |          | 240 -> 243                        | 0.11637    |           |           |          |
| 241 -> 244                                                                        | 0.53048    |                |           |          | Excited State 14:<br><S**2>=0.000 | Singlet-AU | 4.8080 eV | 257.87 nm | f=0.0943 |
| Excited State 4:<br><S**2>=0.000                                                  | Singlet-AG | 3.8037 eV      | 325.96 nm | f=0.0000 | 231 -> 242                        | 0.17320    |           |           |          |
| 241 -> 243                                                                        | 0.69593    |                |           |          | 234 -> 242                        | -0.11134   |           |           |          |
| Excited State 5:<br><S**2>=0.000                                                  | Singlet-AU | 3.8590 eV      | 321.29 nm | f=0.0053 | 240 -> 245                        | -0.13426   |           |           |          |
| 239 -> 242                                                                        | 0.47933    |                |           |          | 241 -> 246                        | 0.35087    |           |           |          |
| 241 -> 244                                                                        | -0.44044   |                |           |          | 241 -> 247                        | 0.48987    |           |           |          |
| 241 -> 246                                                                        | -0.13289   |                |           |          | 241 -> 250                        | -0.15387   |           |           |          |
| 241 -> 250                                                                        | 0.10706    |                |           |          | Excited State 15:<br><S**2>=0.000 | Singlet-AU | 4.8747 eV | 254.34 nm | f=0.0481 |
| Excited State 6:<br><S**2>=0.000                                                  | Singlet-AU | 4.0402 eV      | 306.88 nm | f=0.0013 | 231 -> 242                        | -0.13400   |           |           |          |
| 231 -> 242                                                                        | 0.11222    |                |           |          | 235 -> 242                        | 0.14767    |           |           |          |
| 232 -> 242                                                                        | -0.16820   |                |           |          | 239 -> 242                        | 0.13217    |           |           |          |
| 234 -> 242                                                                        | -0.20897   |                |           |          | 241 -> 246                        | 0.44400    |           |           |          |
| 235 -> 242                                                                        | 0.56404    |                |           |          | 241 -> 247                        | -0.37809   |           |           |          |
| 237 -> 242                                                                        | 0.15898    |                |           |          | 241 -> 250                        | -0.19876   |           |           |          |
| 239 -> 242                                                                        | -0.12028   |                |           |          | Excited State 16:<br><S**2>=0.000 | Singlet-AG | 5.1141 eV | 242.43 nm | f=0.0000 |
| 241 -> 246                                                                        | -0.10514   |                |           |          | 228 -> 242                        | 0.16061    |           |           |          |
| Excited State 7:<br><S**2>=0.000                                                  | Singlet-AG | 4.1716 eV      | 297.21 nm | f=0.0000 | 240 -> 244                        | 0.36013    |           |           |          |
| 241 -> 245                                                                        | 0.69945    |                |           |          | 240 -> 247                        | -0.10339   |           |           |          |
| Excited State 8:<br><S**2>=0.000                                                  | Singlet-AG | 4.5873 eV      | 270.28 nm | f=0.0000 | 241 -> 248                        | 0.49761    |           |           |          |
| 236 -> 242                                                                        | 0.21117    |                |           |          | 241 -> 249                        | -0.12182   |           |           |          |
| 238 -> 242                                                                        | 0.66342    |                |           |          | Excited State 17:<br><S**2>=0.000 | Singlet-AG | 5.1658 eV | 240.01 nm | f=0.0000 |
| Excited State 9:<br><S**2>=0.000                                                  | Singlet-AU | 4.6594 eV      | 266.09 nm | f=0.0164 | 240 -> 244                        | 0.57666    |           |           |          |
| 234 -> 242                                                                        | -0.30170   |                |           |          | 241 -> 248                        | -0.31451   |           |           |          |
| 235 -> 242                                                                        | -0.26762   |                |           |          | Excited State 18:<br><S**2>=0.000 | Singlet-AU | 5.2126 eV | 237.85 nm | f=0.0122 |
| 237 -> 242                                                                        | 0.53884    |                |           |          | 231 -> 242                        | 0.11669    |           |           |          |
| 240 -> 243                                                                        | -0.12741   |                |           |          | 240 -> 245                        | 0.15999    |           |           |          |
| Excited State 10:<br><S**2>=0.000                                                 | Singlet-AG | 4.7251 eV      | 262.40 nm | f=0.0000 | 241 -> 250                        | -0.25697   |           |           |          |
| 217 -> 242                                                                        | 0.24737    |                |           |          | 241 -> 251                        | 0.58118    |           |           |          |
| 230 -> 242                                                                        | 0.10699    |                |           |          | Excited State 19:<br><S**2>=0.000 | Singlet-AG | 5.2389 eV | 236.66 nm | f=0.0000 |
| 233 -> 242                                                                        | -0.30194   |                |           |          | 217 -> 242                        | -0.12481   |           |           |          |
| 236 -> 242                                                                        | 0.48650    |                |           |          | 218 -> 242                        | 0.15327    |           |           |          |
| 238 -> 242                                                                        | -0.18233   |                |           |          | 223 -> 242                        | 0.12710    |           |           |          |
| Excited State 11:<br><S**2>=0.000                                                 | Singlet-AU | 4.7350 eV      | 261.84 nm | f=0.0044 | 227 -> 242                        | 0.18246    |           |           |          |
| 214 -> 242                                                                        | -0.14281   |                |           |          | 228 -> 242                        | 0.37490    |           |           |          |
| 215 -> 242                                                                        | 0.12641    |                |           |          | 230 -> 242                        | -0.29461   |           |           |          |
| 231 -> 242                                                                        | 0.49660    |                |           |          | 233 -> 242                        | -0.22153   |           |           |          |
| 232 -> 242                                                                        | -0.10758   |                |           |          | 241 -> 248                        | -0.28931   |           |           |          |
| 237 -> 242                                                                        | -0.12469   |                |           |          | Excited State 20:<br><S**2>=0.000 | Singlet-AU | 5.2443 eV | 236.41 nm | f=0.0185 |
| 239 -> 242                                                                        | 0.10400    |                |           |          | 215 -> 242                        | 0.11509    |           |           |          |
| 240 -> 248                                                                        | 0.10915    |                |           |          | 229 -> 242                        | 0.19343    |           |           |          |
| 241 -> 247                                                                        | -0.23882   |                |           |          | 231 -> 242                        | 0.10580    |           |           |          |
| Excited State 12:<br><S**2>=0.000                                                 | Singlet-AG | 4.7352 eV      | 261.83 nm | f=0.0000 | 232 -> 242                        | 0.51726    |           |           |          |
| 217 -> 242                                                                        | -0.25453   |                |           |          | 235 -> 242                        | 0.18701    |           |           |          |
| 223 -> 242                                                                        | 0.11513    |                |           |          | 239 -> 242                        | 0.12706    |           |           |          |
|                                                                                   |            |                |           |          | 240 -> 243                        | -0.24190   |           |           |          |
|                                                                                   |            |                |           |          | 241 -> 246                        | -0.10139   |           |           |          |
|                                                                                   |            |                |           |          | Excited State 21:<br><S**2>=0.000 | Singlet-AG | 5.3108 eV | 233.46 nm | f=0.0000 |
|                                                                                   |            |                |           |          | 216 -> 242                        | 0.13891    |           |           |          |
|                                                                                   |            |                |           |          | 217 -> 242                        | 0.24133    |           |           |          |

|                   |            |           |           |          |  |  |  |  |                   |            |           |           |          |
|-------------------|------------|-----------|-----------|----------|--|--|--|--|-------------------|------------|-----------|-----------|----------|
| 218 -> 242        | 0.13602    |           |           |          |  |  |  |  | Excited State 31: | Singlet-AU | 5.8061 eV | 213.54 nm | f=0.0031 |
| 225 -> 242        | 0.12937    |           |           |          |  |  |  |  | <S**2>=0.000      |            |           |           |          |
| 227 -> 242        | 0.22910    |           |           |          |  |  |  |  | 241 -> 246        | 0.33719    |           |           |          |
| 228 -> 242        | 0.25647    |           |           |          |  |  |  |  | 241 -> 250        | 0.54929    |           |           |          |
| 230 -> 242        | 0.11278    |           |           |          |  |  |  |  | 241 -> 251        | 0.22086    |           |           |          |
| 233 -> 242        | 0.45019    |           |           |          |  |  |  |  |                   |            |           |           |          |
| Excited State 22: | Singlet-AU | 5.3218 eV | 232.97 nm | f=0.1734 |  |  |  |  | Excited State 32: | Singlet-AG | 5.8165 eV | 213.16 nm | f=0.0000 |
| <S**2>=0.000      |            |           |           |          |  |  |  |  | <S**2>=0.000      |            |           |           |          |
| 220 -> 242        | 0.20634    |           |           |          |  |  |  |  | 240 -> 247        | -0.25665   |           |           |          |
| 222 -> 242        | -0.10460   |           |           |          |  |  |  |  | 241 -> 248        | 0.12887    |           |           |          |
| 224 -> 242        | 0.19561    |           |           |          |  |  |  |  | 241 -> 249        | 0.58937    |           |           |          |
| 232 -> 242        | 0.29104    |           |           |          |  |  |  |  | 241 -> 252        | -0.13999   |           |           |          |
| 234 -> 242        | -0.17225   |           |           |          |  |  |  |  |                   |            |           |           |          |
| 240 -> 243        | 0.47610    |           |           |          |  |  |  |  | Excited State 33: | Singlet-AG | 5.8716 eV | 211.16 nm | f=0.0000 |
|                   |            |           |           |          |  |  |  |  | <S**2>=0.000      |            |           |           |          |
| Excited State 23: | Singlet-AU | 5.4813 eV | 226.19 nm | f=0.2998 |  |  |  |  | 216 -> 242        | -0.14516   |           |           |          |
| <S**2>=0.000      |            |           |           |          |  |  |  |  | 218 -> 242        | 0.17381    |           |           |          |
| 219 -> 242        | -0.11721   |           |           |          |  |  |  |  | 221 -> 242        | 0.50039    |           |           |          |
| 220 -> 242        | -0.35847   |           |           |          |  |  |  |  | 225 -> 242        | 0.33833    |           |           |          |
| 224 -> 242        | -0.22192   |           |           |          |  |  |  |  | 228 -> 242        | -0.19830   |           |           |          |
| 229 -> 242        | 0.35863    |           |           |          |  |  |  |  | 240 -> 247        | -0.11927   |           |           |          |
| 240 -> 243        | 0.36568    |           |           |          |  |  |  |  |                   |            |           |           |          |
| Excited State 24: | Singlet-AU | 5.5035 eV | 225.28 nm | f=0.5221 |  |  |  |  | Excited State 34: | Singlet-AG | 5.8916 eV | 210.44 nm | f=0.0000 |
| <S**2>=0.000      |            |           |           |          |  |  |  |  | <S**2>=0.000      |            |           |           |          |
| 240 -> 245        | 0.64322    |           |           |          |  |  |  |  | 216 -> 242        | 0.11244    |           |           |          |
| 241 -> 247        | 0.15419    |           |           |          |  |  |  |  | 217 -> 242        | 0.13257    |           |           |          |
| 241 -> 251        | -0.13459   |           |           |          |  |  |  |  | 218 -> 242        | 0.12304    |           |           |          |
|                   |            |           |           |          |  |  |  |  | 221 -> 242        | -0.21444   |           |           |          |
| Excited State 25: | Singlet-AG | 5.5684 eV | 222.66 nm | f=0.0000 |  |  |  |  | 223 -> 242        | 0.48129    |           |           |          |
| <S**2>=0.000      |            |           |           |          |  |  |  |  | 225 -> 242        | 0.30097    |           |           |          |
| 217 -> 242        | -0.12905   |           |           |          |  |  |  |  | 227 -> 242        | -0.16932   |           |           |          |
| 223 -> 242        | 0.28303    |           |           |          |  |  |  |  | 228 -> 242        | -0.14451   |           |           |          |
| 228 -> 242        | 0.20273    |           |           |          |  |  |  |  | 230 -> 242        | -0.12343   |           |           |          |
| 230 -> 242        | 0.52207    |           |           |          |  |  |  |  |                   |            |           |           |          |
| 240 -> 246        | 0.20599    |           |           |          |  |  |  |  | Excited State 35: | Singlet-AU | 5.9072 eV | 209.89 nm | f=0.0024 |
| 240 -> 250        | -0.11135   |           |           |          |  |  |  |  | <S**2>=0.000      |            |           |           |          |
|                   |            |           |           |          |  |  |  |  | 219 -> 242        | 0.29298    |           |           |          |
| Excited State 26: | Singlet-AU | 5.5741 eV | 222.43 nm | f=0.0369 |  |  |  |  | 220 -> 242        | 0.26152    |           |           |          |
| <S**2>=0.000      |            |           |           |          |  |  |  |  | 222 -> 242        | 0.18141    |           |           |          |
| 219 -> 242        | 0.11661    |           |           |          |  |  |  |  | 224 -> 242        | -0.16098   |           |           |          |
| 222 -> 242        | -0.20625   |           |           |          |  |  |  |  | 226 -> 242        | 0.40241    |           |           |          |
| 224 -> 242        | 0.30211    |           |           |          |  |  |  |  | 229 -> 242        | 0.17061    |           |           |          |
| 226 -> 242        | -0.13857   |           |           |          |  |  |  |  | 240 -> 248        | -0.12168   |           |           |          |
| 229 -> 242        | 0.50989    |           |           |          |  |  |  |  |                   |            |           |           |          |
| 232 -> 242        | -0.16862   |           |           |          |  |  |  |  | Excited State 36: | Singlet-AG | 5.9228 eV | 209.33 nm | f=0.0000 |
| 240 -> 243        | -0.11296   |           |           |          |  |  |  |  | <S**2>=0.000      |            |           |           |          |
|                   |            |           |           |          |  |  |  |  | 234 -> 243        | -0.10147   |           |           |          |
| Excited State 27: | Singlet-AG | 5.5827 eV | 222.09 nm | f=0.0000 |  |  |  |  | 241 -> 249        | 0.17047    |           |           |          |
| <S**2>=0.000      |            |           |           |          |  |  |  |  | 241 -> 252        | 0.48467    |           |           |          |
| 223 -> 242        | -0.11117   |           |           |          |  |  |  |  | 241 -> 257        | -0.25178   |           |           |          |
| 228 -> 242        | -0.11658   |           |           |          |  |  |  |  | 241 -> 259        | -0.24412   |           |           |          |
| 230 -> 242        | -0.18230   |           |           |          |  |  |  |  |                   |            |           |           |          |
| 240 -> 246        | 0.52403    |           |           |          |  |  |  |  | Excited State 37: | Singlet-AU | 5.9262 eV | 209.21 nm | f=0.0112 |
| 240 -> 250        | -0.28277   |           |           |          |  |  |  |  | <S**2>=0.000      |            |           |           |          |
| 240 -> 251        | -0.13312   |           |           |          |  |  |  |  | 220 -> 242        | 0.14694    |           |           |          |
|                   |            |           |           |          |  |  |  |  | 224 -> 242        | -0.12536   |           |           |          |
| Excited State 28: | Singlet-AG | 5.6516 eV | 219.38 nm | f=0.0000 |  |  |  |  | 226 -> 242        | 0.20142    |           |           |          |
| <S**2>=0.000      |            |           |           |          |  |  |  |  | 228 -> 243        | -0.12080   |           |           |          |
| 218 -> 242        | 0.12562    |           |           |          |  |  |  |  | 231 -> 242        | -0.17085   |           |           |          |
| 223 -> 242        | 0.15149    |           |           |          |  |  |  |  | 240 -> 248        | 0.24149    |           |           |          |
| 225 -> 242        | -0.12386   |           |           |          |  |  |  |  | 241 -> 254        | -0.12188   |           |           |          |
| 227 -> 242        | 0.53547    |           |           |          |  |  |  |  | 241 -> 255        | -0.14943   |           |           |          |
| 228 -> 242        | -0.34560   |           |           |          |  |  |  |  | 241 -> 256        | -0.23403   |           |           |          |
|                   |            |           |           |          |  |  |  |  | 241 -> 258        | 0.20364    |           |           |          |
| Excited State 29: | Singlet-AU | 5.7248 eV | 216.57 nm | f=0.0019 |  |  |  |  | 241 -> 262        | 0.17846    |           |           |          |
| <S**2>=0.000      |            |           |           |          |  |  |  |  | 241 -> 277        | -0.10815   |           |           |          |
| 219 -> 242        | -0.15276   |           |           |          |  |  |  |  | Excited State 38: | Singlet-AU | 5.9636 eV | 207.90 nm | f=0.0005 |
| 220 -> 242        | -0.21450   |           |           |          |  |  |  |  | <S**2>=0.000      |            |           |           |          |
| 222 -> 242        | -0.14579   |           |           |          |  |  |  |  | 214 -> 242        | 0.12231    |           |           |          |
| 224 -> 242        | 0.37032    |           |           |          |  |  |  |  | 222 -> 242        | 0.59701    |           |           |          |
| 226 -> 242        | 0.50138    |           |           |          |  |  |  |  | 224 -> 242        | 0.30521    |           |           |          |
|                   |            |           |           |          |  |  |  |  |                   |            |           |           |          |
| Excited State 30: | Singlet-AG | 5.7835 eV | 214.38 nm | f=0.0000 |  |  |  |  | Excited State 39: | Singlet-AG | 5.9762 eV | 207.46 nm | f=0.0000 |
| <S**2>=0.000      |            |           |           |          |  |  |  |  | <S**2>=0.000      |            |           |           |          |
| 221 -> 242        | 0.16732    |           |           |          |  |  |  |  | 217 -> 242        | -0.21713   |           |           |          |
| 240 -> 247        | 0.57145    |           |           |          |  |  |  |  | 218 -> 242        | -0.26691   |           |           |          |
| 240 -> 251        | -0.15427   |           |           |          |  |  |  |  | 221 -> 242        | -0.20533   |           |           |          |
| 241 -> 248        | 0.12104    |           |           |          |  |  |  |  | 223 -> 242        | -0.18617   |           |           |          |
| 241 -> 249        | 0.23329    |           |           |          |  |  |  |  | 225 -> 242        | 0.48281    |           |           |          |
|                   |            |           |           |          |  |  |  |  | 227 -> 242        | 0.16539    |           |           |          |



|                   |            |           |           |          |                   |            |           |                    |
|-------------------|------------|-----------|-----------|----------|-------------------|------------|-----------|--------------------|
| Excited State 40: | Singlet-AU | 6.0244 eV | 205.80 nm | f=0.0274 |                   |            |           |                    |
| <S**2>=0.000      |            |           |           |          | Excited State 48: | Singlet-AU | 6.2445 eV | 198.55 nm f=0.0885 |
| 219 -> 242        | -0.10824   |           |           |          | <S**2>=0.000      |            |           |                    |
| 231 -> 242        | -0.17614   |           |           |          | 214 -> 242        | 0.22044    |           |                    |
| 239 -> 244        | -0.13921   |           |           |          | 215 -> 242        | 0.34210    |           |                    |
| 240 -> 248        | 0.37634    |           |           |          | 235 -> 244        | 0.13265    |           |                    |
| 240 -> 249        | -0.10359   |           |           |          | 239 -> 244        | 0.48205    |           |                    |
| 241 -> 254        | 0.17141    |           |           |          |                   |            |           |                    |
| 241 -> 255        | 0.14975    |           |           |          | Excited State 49: | Singlet-AG | 6.2688 eV | 197.78 nm f=0.0000 |
| 241 -> 256        | 0.23098    |           |           |          | <S**2>=0.000      |            |           |                    |
| 241 -> 258        | -0.23228   |           |           |          | 235 -> 243        | -0.10484   |           |                    |
| 241 -> 277        | 0.10192    |           |           |          | 239 -> 243        | -0.11219   |           |                    |
|                   |            |           |           |          | 241 -> 252        | 0.20319    |           |                    |
| Excited State 41: | Singlet-AU | 6.0648 eV | 204.43 nm | f=0.0006 | 241 -> 253        | 0.53499    |           |                    |
| <S**2>=0.000      |            |           |           |          | 241 -> 257        | 0.20818    |           |                    |
| 215 -> 242        | -0.14998   |           |           |          | 241 -> 259        | 0.11316    |           |                    |
| 219 -> 242        | 0.52631    |           |           |          | 241 -> 261        | -0.22053   |           |                    |
| 220 -> 242        | -0.35279   |           |           |          |                   |            |           |                    |
| 229 -> 242        | -0.10678   |           |           |          | Excited State 50: | Singlet-AU | 6.2842 eV | 197.29 nm f=0.0011 |
| 240 -> 248        | 0.12588    |           |           |          | <S**2>=0.000      |            |           |                    |
|                   |            |           |           |          | 214 -> 242        | 0.38113    |           |                    |
| Excited State 42: | Singlet-AG | 6.0783 eV | 203.98 nm | f=0.0000 | 215 -> 242        | -0.25749   |           |                    |
| <S**2>=0.000      |            |           |           |          | 218 -> 243        | -0.14367   |           |                    |
| 217 -> 242        | -0.14309   |           |           |          | 227 -> 243        | -0.13825   |           |                    |
| 218 -> 242        | 0.50696    |           |           |          | 228 -> 243        | -0.19207   |           |                    |
| 221 -> 242        | -0.23340   |           |           |          | 231 -> 242        | 0.12092    |           |                    |
| 223 -> 242        | -0.22244   |           |           |          | 240 -> 248        | -0.15705   |           |                    |
| 227 -> 242        | -0.15482   |           |           |          | 241 -> 254        | 0.15860    |           |                    |
| 230 -> 242        | 0.14232    |           |           |          | 241 -> 262        | 0.12347    |           |                    |
| 241 -> 252        | 0.10786    |           |           |          |                   |            |           |                    |
|                   |            |           |           |          | Excited State 51: | Singlet-AG | 6.3593 eV | 194.96 nm f=0.0000 |
| Excited State 43: | Singlet-AG | 6.1331 eV | 202.16 nm | f=0.0000 | <S**2>=0.000      |            |           |                    |
| <S**2>=0.000      |            |           |           |          | 240 -> 251        | -0.14062   |           |                    |
| 216 -> 242        | 0.28144    |           |           |          | 241 -> 252        | 0.22696    |           |                    |
| 217 -> 242        | 0.20227    |           |           |          | 241 -> 253        | -0.37301   |           |                    |
| 219 -> 243        | 0.11198    |           |           |          | 241 -> 257        | 0.38157    |           |                    |
| 220 -> 243        | 0.23351    |           |           |          | 241 -> 259        | 0.17682    |           |                    |
| 221 -> 242        | 0.12697    |           |           |          | 241 -> 261        | -0.11947   |           |                    |
| 224 -> 243        | 0.13786    |           |           |          | 241 -> 263        | 0.13492    |           |                    |
| 228 -> 251        | -0.12075   |           |           |          |                   |            |           |                    |
| 229 -> 243        | -0.10730   |           |           |          | Excited State 52: | Singlet-AU | 6.4024 eV | 193.65 nm f=0.0253 |
| 232 -> 243        | -0.10785   |           |           |          | <S**2>=0.000      |            |           |                    |
| 234 -> 243        | 0.18758    |           |           |          | 241 -> 254        | 0.60067    |           |                    |
| 235 -> 243        | 0.11900    |           |           |          | 241 -> 255        | -0.16767   |           |                    |
| 241 -> 252        | 0.18733    |           |           |          | 241 -> 256        | -0.15970   |           |                    |
|                   |            |           |           |          |                   |            |           |                    |
| Excited State 44: | Singlet-AG | 6.1928 eV | 200.21 nm | f=0.0000 | Excited State 53: | Singlet-AG | 6.4244 eV | 192.99 nm f=0.0000 |
| <S**2>=0.000      |            |           |           |          | <S**2>=0.000      |            |           |                    |
| 216 -> 242        | 0.56970    |           |           |          | 213 -> 242        | 0.46720    |           |                    |
| 217 -> 242        | -0.29728   |           |           |          | 239 -> 245        | 0.32069    |           |                    |
| 221 -> 242        | 0.14871    |           |           |          | 240 -> 250        | 0.10689    |           |                    |
|                   |            |           |           |          | 240 -> 251        | -0.19465   |           |                    |
| Excited State 45: | Singlet-AU | 6.1965 eV | 200.09 nm | f=0.0027 | 241 -> 252        | 0.11084    |           |                    |
| <S**2>=0.000      |            |           |           |          | 241 -> 253        | 0.10003    |           |                    |
| 210 -> 242        | -0.12042   |           |           |          | 241 -> 259        | 0.10140    |           |                    |
| 214 -> 242        | 0.36758    |           |           |          | 241 -> 261        | 0.15245    |           |                    |
| 215 -> 242        | -0.16213   |           |           |          |                   |            |           |                    |
| 218 -> 243        | 0.10369    |           |           |          | Excited State 54: | Singlet-AG | 6.4252 eV | 192.97 nm f=0.0000 |
| 227 -> 243        | 0.10583    |           |           |          | <S**2>=0.000      |            |           |                    |
| 228 -> 243        | 0.14394    |           |           |          | 213 -> 242        | 0.45211    |           |                    |
| 231 -> 242        | 0.15776    |           |           |          | 239 -> 245        | -0.33911   |           |                    |
| 240 -> 248        | 0.34593    |           |           |          | 240 -> 250        | -0.12353   |           |                    |
|                   |            |           |           |          | 240 -> 251        | 0.25772    |           |                    |
| Excited State 46: | Singlet-AU | 6.2194 eV | 199.35 nm | f=0.0543 | 241 -> 257        | 0.11423    |           |                    |
| <S**2>=0.000      |            |           |           |          |                   |            |           |                    |
| 212 -> 242        | -0.10484   |           |           |          | Excited State 55: | Singlet-AU | 6.4294 eV | 192.84 nm f=0.0040 |
| 214 -> 242        | 0.22781    |           |           |          | <S**2>=0.000      |            |           |                    |
| 215 -> 242        | 0.42452    |           |           |          | 212 -> 242        | 0.66889    |           |                    |
| 219 -> 242        | 0.14839    |           |           |          | 214 -> 242        | 0.10287    |           |                    |
| 232 -> 242        | -0.12365   |           |           |          |                   |            |           |                    |
| 235 -> 244        | -0.14506   |           |           |          | Excited State 56: | Singlet-AU | 6.4909 eV | 191.01 nm f=0.5873 |
| 239 -> 244        | -0.36560   |           |           |          | <S**2>=0.000      |            |           |                    |
|                   |            |           |           |          | 234 -> 244        | -0.18053   |           |                    |
| Excited State 47: | Singlet-AG | 6.2270 eV | 199.11 nm | f=0.0000 | 235 -> 244        | 0.51583    |           |                    |
| <S**2>=0.000      |            |           |           |          | 237 -> 244        | 0.27100    |           |                    |
| 232 -> 243        | -0.15815   |           |           |          | 239 -> 244        | -0.20438   |           |                    |
| 234 -> 243        | -0.12160   |           |           |          |                   |            |           |                    |
| 235 -> 243        | 0.21776    |           |           |          | Excited State 57: | Singlet-AG | 6.4968 eV | 190.84 nm f=0.0000 |
| 239 -> 243        | 0.53860    |           |           |          | <S**2>=0.000      |            |           |                    |
| 240 -> 246        | -0.10936   |           |           |          | 213 -> 242        | -0.19830   |           |                    |
| 240 -> 250        | 0.11000    |           |           |          | 235 -> 243        | 0.12489    |           |                    |
| 241 -> 253        | 0.11096    |           |           |          | 235 -> 245        | -0.11810   |           |                    |

|                   |            |           |           |          |                   |            |           |           |          |  |  |  |
|-------------------|------------|-----------|-----------|----------|-------------------|------------|-----------|-----------|----------|--|--|--|
| 238 -> 244        | 0.13840    |           |           |          |                   |            |           |           |          |  |  |  |
| 240 -> 251        | 0.21444    |           |           |          |                   |            |           |           |          |  |  |  |
| 241 -> 252        | 0.23000    |           |           |          |                   |            |           |           |          |  |  |  |
| 241 -> 259        | 0.28503    |           |           |          |                   |            |           |           |          |  |  |  |
| 241 -> 261        | 0.34790    |           |           |          |                   |            |           |           |          |  |  |  |
| 241 -> 266        | 0.16813    |           |           |          |                   |            |           |           |          |  |  |  |
| Excited State 58: | Singlet-AG | 6.5378 eV | 189.64 nm | f=0.0000 | Excited State 61: | Singlet-AU | 6.5799 eV | 188.43 nm | f=0.0068 |  |  |  |
| <S**2>=0.000      |            |           |           |          | <S**2>=0.000      |            |           |           |          |  |  |  |
| 211 -> 242        | 0.29070    |           |           |          | 241 -> 255        | 0.46670    |           |           |          |  |  |  |
| 235 -> 243        | 0.12264    |           |           |          | 241 -> 256        | -0.33198   |           |           |          |  |  |  |
| 235 -> 245        | -0.28458   |           |           |          | 241 -> 258        | -0.12107   |           |           |          |  |  |  |
| 237 -> 245        | -0.10397   |           |           |          | 241 -> 260        | -0.26285   |           |           |          |  |  |  |
| 239 -> 245        | 0.26967    |           |           |          | 241 -> 265        | -0.12997   |           |           |          |  |  |  |
| 240 -> 247        | 0.10368    |           |           |          | 241 -> 268        | -0.12985   |           |           |          |  |  |  |
| 240 -> 250        | -0.11180   |           |           |          | 241 -> 269        | -0.10721   |           |           |          |  |  |  |
| 240 -> 251        | 0.23526    |           |           |          | Excited State 62: | Singlet-AG | 6.6134 eV | 187.47 nm | f=0.0000 |  |  |  |
| 241 -> 257        | 0.14140    |           |           |          | <S**2>=0.000      |            |           |           |          |  |  |  |
| 241 -> 259        | -0.14317   |           |           |          | 237 -> 243        | -0.12314   |           |           |          |  |  |  |
| 241 -> 261        | -0.16878   |           |           |          | 238 -> 244        | 0.57621    |           |           |          |  |  |  |
| Excited State 59: | Singlet-AU | 6.5543 eV | 189.16 nm | f=0.0085 | 241 -> 259        | -0.19648   |           |           |          |  |  |  |
| <S**2>=0.000      |            |           |           |          | 241 -> 264        | 0.14006    |           |           |          |  |  |  |
| 228 -> 243        | 0.10336    |           |           |          | Excited State 63: | Singlet-AU | 6.6220 eV | 187.23 nm | f=0.0075 |  |  |  |
| 235 -> 244        | -0.11023   |           |           |          | <S**2>=0.000      |            |           |           |          |  |  |  |
| 236 -> 245        | -0.13304   |           |           |          | 235 -> 244        | 0.11683    |           |           |          |  |  |  |
| 238 -> 245        | -0.20551   |           |           |          | 237 -> 244        | -0.32953   |           |           |          |  |  |  |
| 241 -> 254        | -0.10600   |           |           |          | 238 -> 243        | 0.11206    |           |           |          |  |  |  |
| 241 -> 258        | -0.17203   |           |           |          | 241 -> 255        | 0.17857    |           |           |          |  |  |  |
| 241 -> 262        | 0.46113    |           |           |          | 241 -> 256        | -0.19705   |           |           |          |  |  |  |
| 241 -> 269        | 0.13327    |           |           |          | 241 -> 260        | 0.18518    |           |           |          |  |  |  |
| Excited State 60: | Singlet-AG | 6.5685 eV | 188.75 nm | f=0.0000 | 241 -> 268        | 0.38835    |           |           |          |  |  |  |
| <S**2>=0.000      |            |           |           |          | Excited State 64: | Singlet-AU | 6.6512 eV | 186.41 nm | f=0.0293 |  |  |  |
| 211 -> 242        | 0.60663    |           |           |          | <S**2>=0.000      |            |           |           |          |  |  |  |
| 235 -> 245        | 0.10552    |           |           |          | 235 -> 244        | -0.22195   |           |           |          |  |  |  |
| 239 -> 245        | -0.13609   |           |           |          | 237 -> 244        | 0.43283    |           |           |          |  |  |  |
| 241 -> 261        | 0.15102    |           |           |          | 238 -> 243        | -0.16889   |           |           |          |  |  |  |

**Table S10.** Transition Energy, Wavelength, and Oscillator Strengths of the Electronic Transition of **5c**  
(The 241<sup>th</sup> orbital is highest occupied orbital shown in Figure S26) [tdTN117bb1]

|                                                                                   |           |           |           |          |                   |           |           |           |          |  |  |  |
|-----------------------------------------------------------------------------------|-----------|-----------|-----------|----------|-------------------|-----------|-----------|-----------|----------|--|--|--|
| Excited State 1:                                                                  | Singlet-B | 2.8807 eV | 430.39 nm | f=0.1121 | 236 -> 242        | 0.19983   |           |           |          |  |  |  |
| <S**2>=0.000                                                                      |           |           |           |          | 238 -> 242        | 0.26328   |           |           |          |  |  |  |
| 240 -> 244                                                                        | 0.11038   |           |           |          | 239 -> 242        | -0.11046  |           |           |          |  |  |  |
| 241 -> 242                                                                        | 0.68779   |           |           |          | 240 -> 243        | 0.40438   |           |           |          |  |  |  |
| This state for optimization and/or second-order correction.                       |           |           |           |          |                   |           |           |           |          |  |  |  |
| Total Energy, E(TD-HF/TD-KS) = -4973.36122781                                     |           |           |           |          |                   |           |           |           |          |  |  |  |
| Copying the excited state density for this state as the 1-particle RhoCI density. |           |           |           |          |                   |           |           |           |          |  |  |  |
| Excited State 2:                                                                  | Singlet-B | 3.0836 eV | 402.08 nm | f=0.0154 | Excited State 8:  | Singlet-A | 4.6600 eV | 266.06 nm | f=0.0022 |  |  |  |
| <S**2>=0.000                                                                      |           |           |           |          | <S**2>=0.000      |           |           |           |          |  |  |  |
| 240 -> 242                                                                        | 0.68349   |           |           |          | 232 -> 242        | 0.12124   |           |           |          |  |  |  |
| Excited State 3:                                                                  | Singlet-A | 3.6377 eV | 340.83 nm | f=0.0051 | 236 -> 242        | 0.22133   |           |           |          |  |  |  |
| <S**2>=0.000                                                                      |           |           |           |          | 238 -> 242        | 0.11880   |           |           |          |  |  |  |
| 241 -> 243                                                                        | 0.68177   |           |           |          | 239 -> 242        | 0.41889   |           |           |          |  |  |  |
| Excited State 4:                                                                  | Singlet-B | 3.9458 eV | 314.22 nm | f=0.0239 | 240 -> 243        | 0.14957   |           |           |          |  |  |  |
| <S**2>=0.000                                                                      |           |           |           |          | 241 -> 245        | -0.39424  |           |           |          |  |  |  |
| 241 -> 244                                                                        | 0.68675   |           |           |          | 241 -> 247        | 0.16781   |           |           |          |  |  |  |
| Excited State 5:                                                                  | Singlet-A | 4.4118 eV | 281.03 nm | f=0.0064 | Excited State 9:  | Singlet-A | 4.7530 eV | 260.85 nm | f=0.0003 |  |  |  |
| <S**2>=0.000                                                                      |           |           |           |          | <S**2>=0.000      |           |           |           |          |  |  |  |
| 232 -> 242                                                                        | 0.10939   |           |           |          | 230 -> 242        | 0.12674   |           |           |          |  |  |  |
| 235 -> 242                                                                        | -0.10778  |           |           |          | 235 -> 242        | -0.14607  |           |           |          |  |  |  |
| 236 -> 242                                                                        | 0.14713   |           |           |          | 236 -> 242        | -0.20533  |           |           |          |  |  |  |
| 239 -> 242                                                                        | 0.37873   |           |           |          | 238 -> 242        | -0.20735  |           |           |          |  |  |  |
| 240 -> 243                                                                        | -0.12879  |           |           |          | 240 -> 243        | 0.50789   |           |           |          |  |  |  |
| 241 -> 245                                                                        | 0.50112   |           |           |          | 241 -> 247        | -0.10472  |           |           |          |  |  |  |
| Excited State 6:                                                                  | Singlet-B | 4.4502 eV | 278.61 nm | f=0.0031 | 241 -> 248        | 0.18969   |           |           |          |  |  |  |
| <S**2>=0.000                                                                      |           |           |           |          | Excited State 10: | Singlet-A | 4.9405 eV | 250.95 nm | f=0.0033 |  |  |  |
| 240 -> 244                                                                        | -0.11076  |           |           |          | <S**2>=0.000      |           |           |           |          |  |  |  |
| 241 -> 246                                                                        | 0.68716   |           |           |          | 236 -> 242        | 0.16771   |           |           |          |  |  |  |
| Excited State 7:                                                                  | Singlet-A | 4.4545 eV | 278.33 nm | f=0.0005 | 238 -> 242        | 0.12912   |           |           |          |  |  |  |
| <S**2>=0.000                                                                      |           |           |           |          | 240 -> 243        | -0.11207  |           |           |          |  |  |  |
| 230 -> 242                                                                        | -0.15400  |           |           |          | 240 -> 245        | -0.22795  |           |           |          |  |  |  |
| 235 -> 242                                                                        | 0.24366   |           |           |          | 241 -> 247        | -0.20701  |           |           |          |  |  |  |
|                                                                                   |           |           |           |          | 241 -> 248        | 0.51714   |           |           |          |  |  |  |
|                                                                                   |           |           |           |          | Excited State 11: | Singlet-B | 5.0316 eV | 246.41 nm | f=0.0800 |  |  |  |
|                                                                                   |           |           |           |          | <S**2>=0.000      |           |           |           |          |  |  |  |

|                   |           |           |           |          |  |                   |           |           |           |          |  |
|-------------------|-----------|-----------|-----------|----------|--|-------------------|-----------|-----------|-----------|----------|--|
| 220 -> 242        | -0.15552  |           |           |          |  | <S**2>=0.000      |           |           |           |          |  |
| 233 -> 242        | -0.13708  |           |           |          |  | 214 -> 242        | -0.10602  |           |           |          |  |
| 234 -> 242        | -0.17730  |           |           |          |  | 230 -> 242        | 0.31700   |           |           |          |  |
| 240 -> 244        | 0.50759   |           |           |          |  | 235 -> 242        | 0.52325   |           |           |          |  |
| 240 -> 246        | -0.16854  |           |           |          |  | 239 -> 242        | 0.12570   |           |           |          |  |
| 241 -> 249        | -0.23084  |           |           |          |  | 240 -> 247        | -0.14223  |           |           |          |  |
| Excited State 12: | Singlet-A | 5.0345 eV | 246.27 nm | f=0.0000 |  | Excited State 22: | Singlet-A | 5.6766 eV | 218.41 nm | f=0.0010 |  |
| <S**2>=0.000      |           |           |           |          |  | <S**2>=0.000      |           |           |           |          |  |
| 235 -> 242        | 0.10882   |           |           |          |  | 222 -> 242        | -0.24592  |           |           |          |  |
| 236 -> 242        | 0.13622   |           |           |          |  | 227 -> 242        | 0.30682   |           |           |          |  |
| 238 -> 242        | 0.17092   |           |           |          |  | 229 -> 242        | 0.15718   |           |           |          |  |
| 239 -> 242        | -0.15252  |           |           |          |  | 230 -> 244        | -0.13721  |           |           |          |  |
| 240 -> 245        | 0.59365   |           |           |          |  | 231 -> 242        | -0.24365  |           |           |          |  |
| 241 -> 248        | 0.15557   |           |           |          |  | 232 -> 242        | 0.19878   |           |           |          |  |
| Excited State 13: | Singlet-B | 5.1029 eV | 242.97 nm | f=0.0830 |  | 235 -> 244        | 0.11550   |           |           |          |  |
| <S**2>=0.000      |           |           |           |          |  | 240 -> 248        | -0.24179  |           |           |          |  |
| 220 -> 242        | 0.20965   |           |           |          |  | 241 -> 247        | -0.10671  |           |           |          |  |
| 228 -> 242        | 0.13064   |           |           |          |  | Excited State 23: | Singlet-B | 5.7749 eV | 214.70 nm | f=0.0022 |  |
| 233 -> 242        | 0.16677   |           |           |          |  | <S**2>=0.000      |           |           |           |          |  |
| 240 -> 244        | 0.36343   |           |           |          |  | 218 -> 242        | 0.14634   |           |           |          |  |
| 240 -> 246        | 0.21087   |           |           |          |  | 225 -> 242        | -0.13744  |           |           |          |  |
| 241 -> 249        | 0.28153   |           |           |          |  | 236 -> 243        | -0.16220  |           |           |          |  |
| 241 -> 252        | 0.13035   |           |           |          |  | 239 -> 243        | -0.28114  |           |           |          |  |
| Excited State 14: | Singlet-A | 5.1506 eV | 240.72 nm | f=0.0340 |  | 240 -> 249        | 0.44743   |           |           |          |  |
| <S**2>=0.000      |           |           |           |          |  | 240 -> 252        | 0.21729   |           |           |          |  |
| 230 -> 242        | 0.23169   |           |           |          |  | Excited State 24: | Singlet-A | 5.7930 eV | 214.03 nm | f=0.0050 |  |
| 235 -> 242        | -0.17731  |           |           |          |  | <S**2>=0.000      |           |           |           |          |  |
| 236 -> 242        | 0.19175   |           |           |          |  | 230 -> 242        | 0.21025   |           |           |          |  |
| 239 -> 242        | -0.26696  |           |           |          |  | 240 -> 247        | 0.58135   |           |           |          |  |
| 241 -> 247        | 0.40820   |           |           |          |  | 240 -> 251        | 0.24741   |           |           |          |  |
| 241 -> 251        | 0.16325   |           |           |          |  | Excited State 25: | Singlet-B | 5.9399 eV | 208.73 nm | f=0.0215 |  |
| Excited State 15: | Singlet-A | 5.2160 eV | 237.70 nm | f=0.0286 |  | <S**2>=0.000      |           |           |           |          |  |
| <S**2>=0.000      |           |           |           |          |  | 218 -> 242        | 0.10455   |           |           |          |  |
| 230 -> 242        | -0.20667  |           |           |          |  | 225 -> 242        | -0.13500  |           |           |          |  |
| 235 -> 242        | 0.17139   |           |           |          |  | 228 -> 242        | -0.21012  |           |           |          |  |
| 236 -> 242        | -0.29717  |           |           |          |  | 233 -> 242        | 0.43844   |           |           |          |  |
| 241 -> 245        | 0.10026   |           |           |          |  | 234 -> 242        | -0.11304  |           |           |          |  |
| 241 -> 247        | 0.35842   |           |           |          |  | 239 -> 243        | 0.25358   |           |           |          |  |
| 241 -> 248        | 0.24745   |           |           |          |  | 241 -> 250        | 0.14646   |           |           |          |  |
| 241 -> 251        | 0.23554   |           |           |          |  | 241 -> 252        | -0.12144  |           |           |          |  |
| Excited State 16: | Singlet-B | 5.2824 eV | 234.71 nm | f=0.0596 |  | 241 -> 258        | 0.11466   |           |           |          |  |
| <S**2>=0.000      |           |           |           |          |  | Excited State 26: | Singlet-B | 5.9629 eV | 207.93 nm | f=0.0551 |  |
| 220 -> 242        | -0.24135  |           |           |          |  | <S**2>=0.000      |           |           |           |          |  |
| 223 -> 242        | -0.11962  |           |           |          |  | 218 -> 242        | -0.21465  |           |           |          |  |
| 228 -> 242        | -0.10305  |           |           |          |  | 219 -> 242        | -0.10846  |           |           |          |  |
| 233 -> 242        | -0.23519  |           |           |          |  | 223 -> 242        | -0.10302  |           |           |          |  |
| 237 -> 242        | 0.14784   |           |           |          |  | 225 -> 242        | 0.23621   |           |           |          |  |
| 240 -> 246        | 0.13548   |           |           |          |  | 226 -> 242        | 0.10844   |           |           |          |  |
| 241 -> 249        | 0.44825   |           |           |          |  | 228 -> 242        | 0.22567   |           |           |          |  |
| 241 -> 252        | 0.15671   |           |           |          |  | 240 -> 244        | -0.10055  |           |           |          |  |
| Excited State 17: | Singlet-A | 5.4026 eV | 229.49 nm | f=0.0031 |  | 240 -> 249        | 0.30333   |           |           |          |  |
| <S**2>=0.000      |           |           |           |          |  | 241 -> 250        | 0.16256   |           |           |          |  |
| 230 -> 242        | 0.12587   |           |           |          |  | 241 -> 252        | -0.18518  |           |           |          |  |
| 235 -> 242        | -0.15429  |           |           |          |  | 241 -> 258        | 0.15249   |           |           |          |  |
| 236 -> 242        | -0.36545  |           |           |          |  | Excited State 27: | Singlet-A | 5.9746 eV | 207.52 nm | f=0.0022 |  |
| 238 -> 242        | 0.54506   |           |           |          |  | <S**2>=0.000      |           |           |           |          |  |
| Excited State 18: | Singlet-B | 5.4068 eV | 229.31 nm | f=0.0167 |  | 222 -> 242        | 0.10547   |           |           |          |  |
| <S**2>=0.000      |           |           |           |          |  | 227 -> 242        | -0.13856  |           |           |          |  |
| 234 -> 242        | 0.13139   |           |           |          |  | 232 -> 242        | 0.53176   |           |           |          |  |
| 237 -> 242        | 0.66565   |           |           |          |  | 236 -> 242        | -0.11242  |           |           |          |  |
| Excited State 19: | Singlet-B | 5.4541 eV | 227.32 nm | f=0.4391 |  | 238 -> 242        | -0.10446  |           |           |          |  |
| <S**2>=0.000      |           |           |           |          |  | 239 -> 242        | -0.11306  |           |           |          |  |
| 234 -> 242        | -0.18123  |           |           |          |  | 241 -> 247        | -0.13316  |           |           |          |  |
| 240 -> 246        | 0.57976   |           |           |          |  | 241 -> 251        | 0.26522   |           |           |          |  |
| 241 -> 249        | -0.25283  |           |           |          |  | Excited State 28: | Singlet-A | 5.9857 eV | 207.13 nm | f=0.0019 |  |
| Excited State 20: | Singlet-B | 5.5190 eV | 224.65 nm | f=0.1602 |  | <S**2>=0.000      |           |           |           |          |  |
| <S**2>=0.000      |           |           |           |          |  | 232 -> 242        | -0.28106  |           |           |          |  |
| 234 -> 242        | 0.58873   |           |           |          |  | 241 -> 247        | -0.23187  |           |           |          |  |
| 237 -> 242        | -0.11400  |           |           |          |  | 241 -> 248        | -0.20597  |           |           |          |  |
| 240 -> 244        | 0.18455   |           |           |          |  | 241 -> 251        | 0.48972   |           |           |          |  |
| 240 -> 246        | 0.19538   |           |           |          |  | 241 -> 259        | 0.11130   |           |           |          |  |
| Excited State 21: | Singlet-A | 5.5699 eV | 222.60 nm | f=0.0003 |  | Excited State 29: | Singlet-B | 5.9979 eV | 206.71 nm | f=0.0290 |  |
| <S**2>=0.000      |           |           |           |          |  | <S**2>=0.000      |           |           |           |          |  |
|                   |           |           |           |          |  | 218 -> 242        | -0.12107  |           |           |          |  |

|               |          |           |           |           |          |               |          |           |           |           |          |
|---------------|----------|-----------|-----------|-----------|----------|---------------|----------|-----------|-----------|-----------|----------|
| 220 -> 242    | -0.18204 |           |           |           |          | 227 -> 244    | -0.15810 |           |           |           |          |
| 223 -> 242    | -0.11341 |           |           |           |          | 230 -> 242    | -0.12657 |           |           |           |          |
| 225 -> 242    | 0.12373  |           |           |           |          | 236 -> 244    | 0.12234  |           |           |           |          |
| 226 -> 242    | 0.10030  |           |           |           |          | 239 -> 244    | 0.31272  |           |           |           |          |
| 233 -> 242    | 0.40144  |           |           |           |          | 239 -> 246    | -0.11686 |           |           |           |          |
| 236 -> 243    | -0.13141 |           |           |           |          | 240 -> 248    | -0.17429 |           |           |           |          |
| 239 -> 243    | -0.30270 |           |           |           |          | 241 -> 253    | 0.18241  |           |           |           |          |
| 240 -> 249    | -0.13356 |           |           |           |          | 241 -> 254    | 0.15612  |           |           |           |          |
| 241 -> 250    | -0.18662 |           |           |           |          | 241 -> 257    | -0.14961 |           |           |           |          |
|               |          |           |           |           |          | 241 -> 259    | 0.26609  |           |           |           |          |
| Excited State | 30:      | Singlet-B | 6.0244 eV | 205.80 nm | f=0.0705 | Excited State | 38:      | Singlet-A | 6.2963 eV | 196.91 nm | f=0.0001 |
| <S**2>=0.000  |          |           |           |           |          | <S**2>=0.000  |          |           |           |           |          |
| 220 -> 242    | -0.13070 |           |           |           |          | 222 -> 244    | -0.11743 |           |           |           |          |
| 235 -> 243    | -0.12127 |           |           |           |          | 227 -> 244    | 0.12281  |           |           |           |          |
| 239 -> 243    | 0.30861  |           |           |           |          | 236 -> 244    | -0.17527 |           |           |           |          |
| 240 -> 249    | 0.24686  |           |           |           |          | 238 -> 244    | -0.11199 |           |           |           |          |
| 241 -> 249    | -0.16546 |           |           |           |          | 239 -> 244    | -0.23323 |           |           |           |          |
| 241 -> 250    | -0.17730 |           |           |           |          | 241 -> 253    | 0.48383  |           |           |           |          |
| 241 -> 252    | 0.27879  |           |           |           |          | 241 -> 254    | 0.10776  |           |           |           |          |
| 241 -> 258    | -0.19756 |           |           |           |          | 241 -> 259    | 0.13889  |           |           |           |          |
|               |          |           |           |           |          | 241 -> 260    | -0.10550 |           |           |           |          |
| Excited State | 31:      | Singlet-B | 6.0802 eV | 203.91 nm | f=0.0064 | Excited State | 39:      | Singlet-B | 6.3533 eV | 195.15 nm | f=0.0106 |
| <S**2>=0.000  |          |           |           |           |          | <S**2>=0.000  |          |           |           |           |          |
| 241 -> 250    | 0.57953  |           |           |           |          | 218 -> 242    | 0.14107  |           |           |           |          |
| 241 -> 252    | 0.29203  |           |           |           |          | 219 -> 242    | 0.22938  |           |           |           |          |
|               |          |           |           |           |          | 220 -> 242    | -0.11711 |           |           |           |          |
| Excited State | 32:      | Singlet-A | 6.1250 eV | 202.42 nm | f=0.0718 | 223 -> 242    | -0.17694 |           |           |           |          |
| <S**2>=0.000  |          |           |           |           |          | 225 -> 242    | -0.22705 |           |           |           |          |
| 227 -> 242    | 0.15211  |           |           |           |          | 226 -> 242    | 0.11683  |           |           |           |          |
| 229 -> 242    | 0.14016  |           |           |           |          | 228 -> 242    | 0.46878  |           |           |           |          |
| 231 -> 242    | -0.24188 |           |           |           |          | 241 -> 252    | -0.10010 |           |           |           |          |
| 239 -> 244    | 0.15439  |           |           |           |          |               |          |           |           |           |          |
| 240 -> 248    | 0.45150  |           |           |           |          | Excited State | 40:      | Singlet-A | 6.3574 eV | 195.02 nm | f=0.0282 |
| 240 -> 251    | 0.11586  |           |           |           |          | <S**2>=0.000  |          |           |           |           |          |
| 241 -> 257    | -0.11601 |           |           |           |          | 222 -> 244    | 0.11124  |           |           |           |          |
| 241 -> 259    | 0.14530  |           |           |           |          | 227 -> 244    | -0.12293 |           |           |           |          |
|               |          |           |           |           |          | 238 -> 244    | 0.10598  |           |           |           |          |
| Excited State | 33:      | Singlet-A | 6.1557 eV | 201.41 nm | f=0.0084 | 240 -> 248    | 0.19594  |           |           |           |          |
| <S**2>=0.000  |          |           |           |           |          | 241 -> 253    | 0.38363  |           |           |           |          |
| 227 -> 244    | 0.10791  |           |           |           |          | 241 -> 254    | -0.20592 |           |           |           |          |
| 230 -> 242    | 0.19191  |           |           |           |          | 241 -> 257    | 0.20031  |           |           |           |          |
| 231 -> 244    | -0.12642 |           |           |           |          | 241 -> 259    | -0.22364 |           |           |           |          |
| 232 -> 244    | 0.16159  |           |           |           |          | 241 -> 260    | -0.10166 |           |           |           |          |
| 236 -> 244    | 0.20397  |           |           |           |          |               |          |           |           |           |          |
| 238 -> 244    | 0.10803  |           |           |           |          | Excited State | 41:      | Singlet-A | 6.3930 eV | 193.94 nm | f=0.0028 |
| 239 -> 244    | 0.32308  |           |           |           |          | <S**2>=0.000  |          |           |           |           |          |
| 240 -> 248    | -0.20623 |           |           |           |          | 217 -> 242    | 0.13096  |           |           |           |          |
| 241 -> 251    | 0.16082  |           |           |           |          | 224 -> 242    | 0.26177  |           |           |           |          |
| 241 -> 259    | -0.12785 |           |           |           |          | 227 -> 242    | -0.11173 |           |           |           |          |
|               |          |           |           |           |          | 229 -> 242    | 0.54406  |           |           |           |          |
| Excited State | 34:      | Singlet-A | 6.1894 eV | 200.32 nm | f=0.0057 | 231 -> 242    | 0.25428  |           |           |           |          |
| <S**2>=0.000  |          |           |           |           |          |               |          |           |           |           |          |
| 222 -> 242    | -0.25156 |           |           |           |          | Excited State | 42:      | Singlet-B | 6.4063 eV | 193.54 nm | f=0.0127 |
| 227 -> 242    | 0.25477  |           |           |           |          | <S**2>=0.000  |          |           |           |           |          |
| 229 -> 242    | -0.20912 |           |           |           |          | 236 -> 243    | -0.23238 |           |           |           |          |
| 231 -> 242    | 0.50354  |           |           |           |          | 238 -> 243    | 0.21292  |           |           |           |          |
| 232 -> 242    | 0.11570  |           |           |           |          | 241 -> 249    | -0.11983 |           |           |           |          |
|               |          |           |           |           |          | 241 -> 250    | -0.10328 |           |           |           |          |
| Excited State | 35:      | Singlet-B | 6.2363 eV | 198.81 nm | f=0.4857 | 241 -> 252    | 0.25476  |           |           |           |          |
| <S**2>=0.000  |          |           |           |           |          | 241 -> 255    | 0.23456  |           |           |           |          |
| 235 -> 243    | 0.19539  |           |           |           |          | 241 -> 256    | -0.22711 |           |           |           |          |
| 236 -> 243    | 0.36067  |           |           |           |          | 241 -> 258    | 0.25523  |           |           |           |          |
| 238 -> 243    | 0.43114  |           |           |           |          | 241 -> 262    | 0.18188  |           |           |           |          |
| 239 -> 243    | -0.20915 |           |           |           |          | 241 -> 265    | 0.12425  |           |           |           |          |
| 241 -> 252    | 0.10600  |           |           |           |          |               |          |           |           |           |          |
|               |          |           |           |           |          | Excited State | 43:      | Singlet-B | 6.4148 eV | 193.28 nm | f=0.0051 |
| Excited State | 36:      | Singlet-B | 6.2608 eV | 198.03 nm | f=0.0041 | <S**2>=0.000  |          |           |           |           |          |
| <S**2>=0.000  |          |           |           |           |          | 219 -> 242    | -0.22667 |           |           |           |          |
| 218 -> 244    | -0.20244 |           |           |           |          | 223 -> 242    | 0.13274  |           |           |           |          |
| 220 -> 242    | 0.15796  |           |           |           |          | 225 -> 242    | -0.32942 |           |           |           |          |
| 222 -> 248    | 0.12876  |           |           |           |          | 226 -> 242    | 0.53334  |           |           |           |          |
| 225 -> 244    | 0.19314  |           |           |           |          |               |          |           |           |           |          |
| 227 -> 248    | -0.14076 |           |           |           |          | Excited State | 44:      | Singlet-A | 6.4503 eV | 192.22 nm | f=0.0012 |
| 228 -> 242    | 0.26209  |           |           |           |          | <S**2>=0.000  |          |           |           |           |          |
| 228 -> 244    | 0.13556  |           |           |           |          | 237 -> 243    | 0.62383  |           |           |           |          |
| 231 -> 248    | 0.10146  |           |           |           |          | 237 -> 245    | 0.12165  |           |           |           |          |
| 234 -> 244    | -0.20909 |           |           |           |          | 238 -> 244    | -0.13661 |           |           |           |          |
| 241 -> 252    | 0.23452  |           |           |           |          |               |          |           |           |           |          |
|               |          |           |           |           |          | Excited State | 45:      | Singlet-B | 6.4607 eV | 191.91 nm | f=0.0227 |
| Excited State | 37:      | Singlet-A | 6.2669 eV | 197.84 nm | f=0.0198 | <S**2>=0.000  |          |           |           |           |          |
| <S**2>=0.000  |          |           |           |           |          |               |          |           |           |           |          |
| 222 -> 244    | 0.15115  |           |           |           |          |               |          |           |           |           |          |

|                   |           |           |           |          |                   |           |           |           |          |
|-------------------|-----------|-----------|-----------|----------|-------------------|-----------|-----------|-----------|----------|
| 235 -> 243        | -0.11891  |           |           |          | 228 -> 242        | -0.18024  |           |           |          |
| 236 -> 243        | -0.35402  |           |           |          |                   |           |           |           |          |
| 237 -> 244        | -0.13827  |           |           |          | Excited State 53: | Singlet-A | 6.6437 eV | 186.62 nm | f=0.0538 |
| 238 -> 243        | 0.38769   |           |           |          | <S**2>=0.000      |           |           |           |          |
| 239 -> 243        | 0.10901   |           |           |          | 234 -> 243        | 0.36164   |           |           |          |
| 241 -> 252        | -0.10980  |           |           |          | 235 -> 246        | -0.11344  |           |           |          |
| 241 -> 255        | -0.17753  |           |           |          | 236 -> 244        | 0.22899   |           |           |          |
| 241 -> 256        | 0.17873   |           |           |          | 236 -> 246        | -0.18629  |           |           |          |
| 241 -> 258        | -0.14410  |           |           |          | 238 -> 244        | 0.11296   |           |           |          |
| 241 -> 262        | -0.13429  |           |           |          | 238 -> 246        | -0.18544  |           |           |          |
|                   |           |           |           |          | 239 -> 244        | -0.17592  |           |           |          |
| Excited State 46: | Singlet-B | 6.5334 eV | 189.77 nm | f=0.1185 | 239 -> 246        | 0.26838   |           |           |          |
| <S**2>=0.000      |           |           |           |          | 240 -> 248        | -0.10182  |           |           |          |
| 219 -> 242        | -0.23106  |           |           |          |                   |           |           |           |          |
| 221 -> 242        | -0.12569  |           |           |          | Excited State 54: | Singlet-B | 6.6667 eV | 185.98 nm | f=0.0171 |
| 223 -> 242        | -0.12038  |           |           |          | <S**2>=0.000      |           |           |           |          |
| 235 -> 243        | 0.27400   |           |           |          | 218 -> 242        | 0.27524   |           |           |          |
| 236 -> 243        | -0.13518  |           |           |          | 220 -> 242        | 0.13271   |           |           |          |
| 236 -> 245        | 0.10536   |           |           |          | 223 -> 242        | -0.11196  |           |           |          |
| 239 -> 245        | 0.38377   |           |           |          | 225 -> 242        | 0.10982   |           |           |          |
| 240 -> 249        | -0.12897  |           |           |          | 226 -> 242        | 0.11050   |           |           |          |
| 241 -> 262        | -0.12000  |           |           |          | 241 -> 256        | -0.12100  |           |           |          |
|                   |           |           |           |          | 241 -> 258        | -0.27015  |           |           |          |
| Excited State 47: | Singlet-A | 6.5393 eV | 189.60 nm | f=0.0000 | 241 -> 261        | -0.19104  |           |           |          |
| <S**2>=0.000      |           |           |           |          | 241 -> 262        | 0.29479   |           |           |          |
| 217 -> 242        | -0.16295  |           |           |          | 241 -> 265        | 0.18712   |           |           |          |
| 224 -> 242        | 0.55972   |           |           |          |                   |           |           |           |          |
| 227 -> 242        | -0.23868  |           |           |          | Excited State 55: | Singlet-B | 6.7094 eV | 184.79 nm | f=0.0452 |
| 229 -> 242        | -0.19214  |           |           |          | <S**2>=0.000      |           |           |           |          |
| 230 -> 242        | 0.10426   |           |           |          | 215 -> 242        | 0.10157   |           |           |          |
| 231 -> 242        | -0.11693  |           |           |          | 218 -> 242        | 0.32516   |           |           |          |
|                   |           |           |           |          | 219 -> 242        | -0.23725  |           |           |          |
| Excited State 48: | Singlet-B | 6.5823 eV | 188.36 nm | f=0.0023 | 223 -> 242        | -0.20508  |           |           |          |
| <S**2>=0.000      |           |           |           |          | 225 -> 242        | 0.12400   |           |           |          |
| 219 -> 242        | 0.25194   |           |           |          | 239 -> 245        | -0.26847  |           |           |          |
| 220 -> 242        | -0.10257  |           |           |          | 241 -> 258        | 0.21257   |           |           |          |
| 221 -> 242        | 0.27649   |           |           |          | 241 -> 262        | -0.14316  |           |           |          |
| 223 -> 242        | 0.31988   |           |           |          |                   |           |           |           |          |
| 225 -> 242        | 0.17627   |           |           |          | Excited State 56: | Singlet-A | 6.7118 eV | 184.73 nm | f=0.0410 |
| 226 -> 242        | 0.17458   |           |           |          | <S**2>=0.000      |           |           |           |          |
| 235 -> 243        | 0.33012   |           |           |          | 235 -> 244        | -0.12118  |           |           |          |
| 238 -> 245        | -0.10267  |           |           |          | 236 -> 244        | -0.11381  |           |           |          |
|                   |           |           |           |          | 238 -> 244        | -0.23402  |           |           |          |
| Excited State 49: | Singlet-B | 6.5909 eV | 188.12 nm | f=0.0212 | 239 -> 244        | 0.15138   |           |           |          |
| <S**2>=0.000      |           |           |           |          | 239 -> 246        | 0.15544   |           |           |          |
| 218 -> 242        | -0.15622  |           |           |          | 241 -> 253        | 0.11695   |           |           |          |
| 221 -> 242        | -0.15798  |           |           |          | 241 -> 254        | -0.26048  |           |           |          |
| 223 -> 242        | -0.13603  |           |           |          | 241 -> 257        | -0.25178  |           |           |          |
| 225 -> 242        | -0.25148  |           |           |          | 241 -> 259        | -0.12517  |           |           |          |
| 226 -> 242        | -0.17396  |           |           |          | 241 -> 260        | 0.28491   |           |           |          |
| 235 -> 243        | 0.35801   |           |           |          | 241 -> 268        | 0.11867   |           |           |          |
| 236 -> 245        | -0.15278  |           |           |          | 241 -> 270        | 0.10813   |           |           |          |
| 238 -> 245        | -0.15509  |           |           |          |                   |           |           |           |          |
| 239 -> 243        | 0.10976   |           |           |          | Excited State 57: | Singlet-A | 6.7222 eV | 184.44 nm | f=0.0068 |
| 239 -> 245        | -0.14523  |           |           |          | <S**2>=0.000      |           |           |           |          |
| 241 -> 255        | -0.14774  |           |           |          | 235 -> 246        | 0.10348   |           |           |          |
|                   |           |           |           |          | 236 -> 244        | 0.10142   |           |           |          |
| Excited State 50: | Singlet-A | 6.5910 eV | 188.11 nm | f=0.0014 | 239 -> 246        | -0.16442  |           |           |          |
| <S**2>=0.000      |           |           |           |          | 240 -> 251        | -0.12836  |           |           |          |
| 222 -> 242        | 0.43342   |           |           |          | 241 -> 254        | 0.36545   |           |           |          |
| 224 -> 242        | 0.19480   |           |           |          | 241 -> 259        | -0.20559  |           |           |          |
| 227 -> 242        | 0.35232   |           |           |          | 241 -> 260        | 0.38057   |           |           |          |
| 234 -> 243        | 0.18685   |           |           |          |                   |           |           |           |          |
| 239 -> 246        | -0.17672  |           |           |          | Excited State 58: | Singlet-A | 6.7284 eV | 184.27 nm | f=0.0332 |
|                   |           |           |           |          | <S**2>=0.000      |           |           |           |          |
| Excited State 51: | Singlet-A | 6.6125 eV | 187.50 nm | f=0.0105 | 236 -> 244        | -0.10515  |           |           |          |
| <S**2>=0.000      |           |           |           |          | 240 -> 247        | -0.23321  |           |           |          |
| 222 -> 242        | -0.31750  |           |           |          | 240 -> 248        | -0.11977  |           |           |          |
| 227 -> 242        | -0.16636  |           |           |          | 240 -> 251        | 0.50425   |           |           |          |
| 234 -> 243        | 0.41592   |           |           |          | 240 -> 259        | 0.10685   |           |           |          |
| 235 -> 244        | -0.15740  |           |           |          | 241 -> 254        | 0.21083   |           |           |          |
| 238 -> 246        | 0.10956   |           |           |          | 241 -> 257        | 0.10302   |           |           |          |
| 239 -> 246        | -0.24134  |           |           |          | 241 -> 259        | -0.13986  |           |           |          |
| 241 -> 254        | -0.10410  |           |           |          |                   |           |           |           |          |
|                   |           |           |           |          | Excited State 59: | Singlet-B | 6.7481 eV | 183.73 nm | f=0.0068 |
| Excited State 52: | Singlet-B | 6.6320 eV | 186.95 nm | f=0.0047 | <S**2>=0.000      |           |           |           |          |
| <S**2>=0.000      |           |           |           |          | 218 -> 242        | -0.10338  |           |           |          |
| 218 -> 242        | -0.13852  |           |           |          | 219 -> 242        | -0.13533  |           |           |          |
| 219 -> 242        | 0.36839   |           |           |          | 221 -> 242        | 0.49172   |           |           |          |
| 220 -> 242        | 0.32346   |           |           |          | 223 -> 242        | -0.14141  |           |           |          |
| 223 -> 242        | -0.35970  |           |           |          | 225 -> 242        | -0.18242  |           |           |          |
| 226 -> 242        | 0.19562   |           |           |          | 226 -> 242        | -0.12894  |           |           |          |

|               |          |           |           |           |          |  |  |  |  |               |               |           |           |           |           |          |  |  |  |  |
|---------------|----------|-----------|-----------|-----------|----------|--|--|--|--|---------------|---------------|-----------|-----------|-----------|-----------|----------|--|--|--|--|
| 238 -> 245    | -0.12120 |           |           |           |          |  |  |  |  |               | <S**2>=0.000  |           |           |           |           |          |  |  |  |  |
| 241 -> 255    | 0.19509  |           |           |           |          |  |  |  |  |               | 216 -> 242    | 0.19051   |           |           |           |          |  |  |  |  |
| 241 -> 258    | -0.13185 |           |           |           |          |  |  |  |  |               | 217 -> 242    | -0.20198  |           |           |           |          |  |  |  |  |
| 241 -> 261    | 0.15142  |           |           |           |          |  |  |  |  |               | 229 -> 242    | 0.11597   |           |           |           |          |  |  |  |  |
| Excited State | 60:      | Singlet-A | 6.7517 eV | 183.64 nm | f=0.0135 |  |  |  |  |               | 236 -> 246    | 0.14409   |           |           |           |          |  |  |  |  |
| <S**2>=0.000  |          |           |           |           |          |  |  |  |  |               | 241 -> 257    | 0.32138   |           |           |           |          |  |  |  |  |
| 235 -> 244    | -0.10334 |           |           |           |          |  |  |  |  |               | 241 -> 259    | 0.21263   |           |           |           |          |  |  |  |  |
| 236 -> 244    | -0.14352 |           |           |           |          |  |  |  |  |               | 241 -> 260    | 0.27533   |           |           |           |          |  |  |  |  |
| 238 -> 244    | -0.28992 |           |           |           |          |  |  |  |  |               | 241 -> 263    | 0.19231   |           |           |           |          |  |  |  |  |
| 239 -> 244    | 0.16524  |           |           |           |          |  |  |  |  |               | 241 -> 264    | -0.12039  |           |           |           |          |  |  |  |  |
| 239 -> 246    | 0.23284  |           |           |           |          |  |  |  |  |               | Excited State | 63:       | Singlet-B | 6.7827 eV | 182.79 nm | f=0.0861 |  |  |  |  |
| 240 -> 251    | -0.18653 |           |           |           |          |  |  |  |  | <S**2>=0.000  |               |           |           |           |           |          |  |  |  |  |
| 241 -> 254    | 0.29593  |           |           |           |          |  |  |  |  |               | 240 -> 250    | 0.49767   |           |           |           |          |  |  |  |  |
| 241 -> 257    | 0.16300  |           |           |           |          |  |  |  |  |               | 240 -> 252    | -0.21626  |           |           |           |          |  |  |  |  |
| 241 -> 259    | -0.13087 |           |           |           |          |  |  |  |  |               | 240 -> 255    | 0.10366   |           |           |           |          |  |  |  |  |
| 241 -> 260    | -0.19878 |           |           |           |          |  |  |  |  |               | 240 -> 258    | 0.22370   |           |           |           |          |  |  |  |  |
| 241 -> 268    | -0.10479 |           |           |           |          |  |  |  |  |               | 241 -> 256    | 0.10299   |           |           |           |          |  |  |  |  |
| Excited State | 61:      | Singlet-B | 6.7584 eV | 183.45 nm | f=0.0065 |  |  |  |  | Excited State | 64:           | Singlet-A | 6.7945 eV | 182.48 nm | f=0.0191  |          |  |  |  |  |
| <S**2>=0.000  |          |           |           |           |          |  |  |  |  | <S**2>=0.000  |               |           |           |           |           |          |  |  |  |  |
| 221 -> 242    | -0.23518 |           |           |           |          |  |  |  |  |               | 216 -> 242    | -0.29769  |           |           |           |          |  |  |  |  |
| 225 -> 242    | 0.11679  |           |           |           |          |  |  |  |  |               | 217 -> 242    | 0.42491   |           |           |           |          |  |  |  |  |
| 239 -> 245    | -0.17798 |           |           |           |          |  |  |  |  |               | 224 -> 242    | 0.13779   |           |           |           |          |  |  |  |  |
| 241 -> 255    | 0.35334  |           |           |           |          |  |  |  |  |               | 227 -> 242    | 0.10817   |           |           |           |          |  |  |  |  |
| 241 -> 258    | -0.32191 |           |           |           |          |  |  |  |  |               | 229 -> 242    | -0.15546  |           |           |           |          |  |  |  |  |
| 241 -> 261    | 0.22636  |           |           |           |          |  |  |  |  |               | 238 -> 246    | -0.11579  |           |           |           |          |  |  |  |  |
| 241 -> 265    | -0.13869 |           |           |           |          |  |  |  |  |               | 241 -> 257    | 0.18478   |           |           |           |          |  |  |  |  |
| Excited State | 62:      | Singlet-A | 6.7755 eV | 182.99 nm | f=0.0088 |  |  |  |  |               | 241 -> 260    | 0.16822   |           |           |           |          |  |  |  |  |

## 6. References

- S1. G. R. Fulmer, A. J. M. Miller, N. H. Sherden, H. E. Gottlieb, A. Nudelman, B. M. Stoltz, J. E. Bercaw, K. I. Goldberg, *Organometallics* 2010, **29**, 2176-2179.
- S2. T. Nukazawa, T. Iwamoto, *Dalton Trans.* 2020, **49**, 16728-16735.
- S3. G. M. Sheldrick, *SADABS, Empirical Absorption Correction Program*; Göttingen, Germany, 1996.
- S4. G. M. Sheldrick, *Acta Crystallogr., Sect. C: Struct. Chem.*, 2015, **71**, 3-8.
- S5. K. Wakita, Yadokari-XG: Software for Crystal Structure Analyses, 2001; Release of Software (Yadokari-XG 2009) for Crystal Structure Analyses, C. Kabuto, S. Akine, T. Nemoto, E. Kwon, *J. Crystallogr. Soc. Jpn.*, 2009, **51**, 218-224.
- S6. Gaussian 09, Revision D.01, M. J. Frisch, G. W. Trucks, H. B. Schlegel, G. E. Scuseria, M. A. Robb, J. R. Cheeseman, G. Scalmani, V. Barone, B. Mennucci, G. A. Petersson, H. Nakatsuji, M. Caricato, X. Li, H. P. Hratchian, A. F. Izmaylov, J. Bloino, G. Zheng, J. L. Sonnenberg, M. Hada, M. Ehara, K. Toyota, R. Fukuda, J. Hasegawa, M. Ishida, T. Nakajima, Y. Honda, O. Kitao, H. Nakai, T. Vreven, J. A. Montgomery Jr., J. E. Peralta, F. Ogliaro, M. Bearpark, J. J. Heyd, E. Brothers, K. N. Kudin, V. N. Staroverov, R. Kobayashi, J. Normand, K. Raghavachari, A. Rendell, J. C. Burant, S. S. Iyengar, J. Tomasi, M. Cossi, N. Rega, J. M. Millam, M. Klene, J. E. Knox, J. B. Cross, V. Bakken, C. Adamo, J. Jaramillo, R. Gomperts, R. E. Stratmann, O. Yazyev, A. J. Austin, R. Cammi, C. Pomelli, J. W. Ochterski, R. L. Martin, K. Morokuma, V. G. Zakrzewski, G. A. Voth, P. Salvador, J. J. Dannenberg, S. Dapprich, A. D. Daniels, Ö. Farkas, J. B. Foresman, J. V. Ortiz, J. Cioslowski, D. J. Fox, Gaussian, Inc., Wallingford CT, 2009.
- S7. **GRRM14**; a) S. Maeda, Y. Harabuchi, Y. Osada, T. Taketsugu, K. Morokuma, K. Ohno, see <https://iqce.jp/GRRM/> (accessed date March 21, 2020); b) S. Maeda, K. Ohno, K. Morokuma, *Phys. Chem. Chem. Phys.*, 2013, **15**, 3683-3701.
- S8. **NBO 7.0**, E. D. Glendening, J. K. Badenhoop, A. E. Reed, J. E. Carpenter, J. A. Bohmann, C. M. Morales, P. Karafiloglou, C. R. Landis, F. Weinhold, Theoretical Chemistry Institute, University of Wisconsin, Madison (2018).
